# Supplementary material
Source: publisher figshare collection journal article supplement (https://gsajournals.figshare.com/ndownloader/files/28319955)
Supplement: Supplementary file 1 [file 28319955]

## Sheet: Readme
The following spreadsheet consists of TRiP (transgenic RNAi Project) lines used in the following screen.
Column A Status on crosses (analyzed, crosses lethal, or Not available)
Analyzed-Spreadsheet in Yellow
Crosses lethal- Spreadsheet in Grey
Lines Not Available in Blue
Column B CG number
Column C Gene's common name otherwise denoted as CG number
Column D Bloomington Stock Center Number
Column E Genotype (background and vector insertion)
The following column consist of sleep traits and starvation resistance measured for testable lines.
Column F Total Sleep (mins./24hr)
Column G Starved sleep (mins. /24 hrs.)
Column H Percent change in sleep ((Starved-fed)/fed sleep)*100)
Column I Waking Activity (beam breaks/min)
Column J Sleep Bout (#of sleep/24hrs)
Column K Average Bout Length (mins/bout length)
Column L Day Sleep (mins./12 hrs.)
Column M Night Sleep (mins./12hrs)
Column N Starvation resistance (hrs. until death)

## Sheet: Master Screen Sheet
Status	CG number	Gene	BL number	Genotype	Total Sleep (mins./24hr)	Starved sleep (mins. /24 hrs)	Percent change in sleep ((Starved-fed)/fed sleep)*100	Waking Activity beam (breaks/min)	Sleep Bout (#of sleep/24hrs)	Average Bout Length (mins/bout length)	Day Sleep (mins./12 hrs)	Night Sleep (mins./12hrs)	Starvation resistance (hrs until death)
Analyzed	CG33100	4EHP	36876	y[1] sc[*] v[1]; P{y[+t7.7] v[+t1.8]=TRiP.GL01035}attP2	884.375	800	-7.47408	0.878422	37.0625	25.7774	296.25	588.125	85.708
Analyzed	CG32062	A2bp1	32476	y[1] sc[*] v[1]; P{y[+t7.7] v[+t1.8]=TRiP.HMS00478}attP2	876.429	763.929	-12.9161	0.958146	32.3571	28.5375	261.429	615	85.917
Analyzed	CG4633	Aats-ala-m	43274	y[1] sc[*] v[1]; P{y[+t7.7] v[+t1.8]=TRiP.GLC01463}attP2	1050.62	681.562	-34.4115	0.775835	27.125	42.1999	382.188	668.438	76.625
Analyzed	CG10687	Aats-asn	28317	y[1] v[1]; P{y[+t7.7] v[+t1.8]=TRiP.JF02948}attP2	955.556	637.222	-28.4264	0.789859	32.5556	30.0193	301.111	654.444	77.417
Analyzed	CG10325	abd-A	28739	y[1] v[1]; P{y[+t7.7] v[+t1.8]=TRiP.JF03167}attP2	1014	798.429	-20.8382	1.2339	31.4571	35.3774	380.143	633.857	9.9167
Analyzed	CG11648	Abd-B	26746	y[1] v[1]; P{y[+t7.7] v[+t1.8]=TRiP.JF02309}attP2	870.833	806.667	-8.46304	1.10683	30.8333	31.6948	297.5	573.333	24.2917
Analyzed	CG4032	Abl	61170	y[1] sc[*] v[1]; P{y[+t7.7] v[+t1.8]=TRiP.HMC05140}attP40	909	747.8	-11.6782	1.45969	37	26.7551	298.2	610.8	77.167
Analyzed	CG9210	Ac13E	62247	y[1] sc[*] v[1]; P{y[+t7.7] v[+t1.8]=TRiP.HMC05254}attP40	865.556	646.667	-23.4294	0.791615	36.6667	25.3859	302.778	562.778	78.083
Analyzed	CG9151	acj6	29335	y[1] v[1]; P{y[+t7.7] v[+t1.8]=TRiP.JF02497}attP2	957.069	725	-23.658	1.51746	32.069	30.659	306.897	650.172	74.542
Analyzed	CG8604	Amph	28048	y[1] v[1]; P{y[+t7.7] v[+t1.8]=TRiP.JF02883}attP2	898.333	845	-4.1251	1.00721	41.8	23.2597	340.333	558	77
Analyzed	CG42734	Ank2	29438	y[1] v[1]; P{y[+t7.7] v[+t1.8]=TRiP.JF03374}attP2	824.286	615	-24.5229	1.242	39.5714	21.573	257.857	566.429	78
Analyzed	CG5730	AnxB9	58111	y[1] v[1]; P{y[+t7.7] v[+t1.8]=TRiP.HMJ22047}attP40	907.5	645.769	-23.8992	1.13015	37.7308	27.5685	342.115	565.385	67.667
Analyzed	CG4531	aos	28383	y[1] v[1]; P{y[+t7.7] v[+t1.8]=TRiP.JF03020}attP2	736	701.5	-2.8232	1.22518	42.1	18.0229	283	453	82.5
Analyzed	CG6193	Apc2	28585	y[1] v[1]; P{y[+t7.7] v[+t1.8]=TRiP.HM05073}attP2	931.711	739.474	-20.2755	0.823881	38.2632	25.3508	298.421	633.289	76.583
Analyzed	CG14444	APC7	38932	y[1] sc[*] v[1]; P{y[+t7.7] v[+t1.8]=TRiP.GL01114}attP2	940	734.667	-21.5339	0.964	33.6667	29.7284	283	657	92.167
Analyzed	CG5393	apt	26236	y[1] v[1]; P{y[+t7.7] v[+t1.8]=TRiP.JF02134}attP2	1009.58	707.5	-29.8226	1.14828	36.9167	28.4893	370.417	639.167	65.875
Analyzed	CG31762	aret	38983	y[1] v[1]; P{y[+t7.7] v[+t1.8]=TRiP.HMS01899}attP40	1105.45	734.091	-32.6053	1.28399	28.4545	47.2479	434.091	671.364	39.0833
Analyzed	CG32031	Argk	41697	y[1] sc[*] v[1]; P{y[+t7.7] v[+t1.8]=TRiP.HMS02262}attP2	875	973.421	12.6406	1.03035	42.3158	21.4593	323.421	551.579	100.417
Analyzed	CG7558	Arp3	32921	y[1] sc[*] v[1]; P{y[+t7.7] v[+t1.8]=TRiP.HMS00711}attP2	772.5	864.167	17.1046	0.674417	37.1667	21.2862	203.75	568.75	63.75
Analyzed	CG5912	arr	31313	y[1] v[1]; P{y[+t7.7] v[+t1.8]=TRiP.JF01260}attP2	890	732.083	-11.0339	1.12426	33.6667	28.0215	314.167	575.833	27.6667
Analyzed	CG4276	aru	52976	y[1] v[1]; P{y[+t7.7] v[+t1.8]=TRiP.HMJ21663}attP40	727.083	665	-8.65526	0.847524	32.4167	22.9551	164.167	562.917	36
Analyzed	CG2969	Atet	50563	y[1] v[1]; P{y[+t7.7] v[+t1.8]=TRiP.GLC01683}attP2	979.5	449	-53.048	1.31916	32.9	32.1584	347	632.5	72.25
Analyzed	CG4428	Atg4a	28367	y[1] v[1]; P{y[+t7.7] v[+t1.8]=TRiP.JF03003}attP2	906.75	683.75	-23.6051	0.90133	39.1	23.8596	317.25	589.5	74.625
Analyzed	CG5489	Atg7	27707	y[1] v[1]; P{y[+t7.7] v[+t1.8]=TRiP.JF02787}attP2	859.286	446.071	-46.7981	0.814283	47.1429	18.8652	344.286	515	49.125
Analyzed	CG3624	babos	36728	y[1] sc[*] v[1]; P{y[+t7.7] v[+t1.8]=TRiP.HMS01619}attP2	743.333	707.778	3.33632	1.12149	36.2222	24.3583	243.889	499.444	61
Analyzed	CG5055	baz	38213	y[1] sc[*] v[1]; P{y[+t7.7] v[+t1.8]=TRiP.GL00654}attP40	902	777.429	-13.0567	1.31022	35.8857	26.4099	267	635	96.375
Analyzed	CG33179	beat-IIIb	56984	y[1] sc[*] v[1]; P{y[+t7.7] v[+t1.8]=TRiP.HMC04424}attP40	953.095	663.095	-28.4155	1.14329	30.7143	33.9442	316.19	636.905	88.875
Analyzed	CG5529	B-H1	31711	y[1] v[1]; P{y[+t7.7] v[+t1.8]=TRiP.HM04018}attP2	947.045	618.409	-33.7835	0.924892	30.8182	32.3081	335.909	611.136	71.458
Analyzed	CG5488	B-H2	33647	y[1] sc[*] v[1]; P{y[+t7.7] v[+t1.8]=TRiP.HMS00048}attP2	1011.43	759.107	-24.9151	1.05309	33.8214	31.6676	363.036	648.393	91.25
Analyzed	CG3578	bi	44095	y[1] sc[*] v[1]; P{y[+t7.7] v[+t1.8]=TRiP.HMS02815}attP2	855.833	878.333	3.94069	1.24677	42.75	20.9174	315.417	540.417	101.958
Analyzed	CG6605	BicD	42929	y[1] sc[*] v[1]; P{y[+t7.7] v[+t1.8]=TRiP.HMS02622}attP40	1006.67	584.444	-41.9039	1.74264	31.8889	33.6717	352.778	653.889	64.667
Analyzed	CG10021	bowl	27074	y[1] v[1]; P{y[+t7.7] v[+t1.8]=TRiP.JF02419}attP2	831.667	593.167	-26.895	1.03659	36.1667	31.6627	246.5	585.167	75.417
Analyzed	CG10719	brat	28590	y[1] v[1]; P{y[+t7.7] v[+t1.8]=TRiP.HM05078}attP2	690	635	-7.97101	1.04933	30	23	130	560	31.125
Analyzed	CG5942	brm	34520	y[1] sc[*] v[1]; P{y[+t7.7] v[+t1.8]=TRiP.HMS00050}attP2	857.941	763.235	-10.0953	1.28342	37.4706	23.8186	279.706	578.235	94.083
Analyzed	CG43065	bru-2	50627	y[1] v[1]; P{y[+t7.7] v[+t1.8]=TRiP.HMC02994}attP40	890.417	776.25	-11.8452	0.974094	35.5833	26.1844	267.5	622.917	110.375
Analyzed	CG43744	bru-3	50734	y[1] sc[*] v[1]; P{y[+t7.7] v[+t1.8]=TRiP.HMS02970}attP2	992.222	1053.33	9.67362	1.46387	29.1111	37.2882	473.889	518.333	108.365
Analyzed	CG3411	bs	26755	y[1] v[1]; P{y[+t7.7] v[+t1.8]=TRiP.JF02319}attP2	932.727	727.273	-20.0812	0.921469	43.2727	22.2047	389.091	543.636	0
Analyzed	CG12205	Bsg25A	58167	y[1] v[1]; P{y[+t7.7] v[+t1.8]=TRiP.HMJ22144}attP40	948.25	826.5	-11.9559	1.13171	36.15	27.5486	342.5	605.75	72.833
Analyzed	CG42281	bun	28322	y[1] v[1]; P{y[+t7.7] v[+t1.8]=TRiP.JF02954}attP2	1030.42	621.25	-40.3152	0.974083	32.4167	36.4782	415	615.417	24.4167
Analyzed	CG7260	byn	50906	y[1] v[1]; P{y[+t7.7] v[+t1.8]=TRiP.HMJ03127}attP40	903.636	751.364	-16.6716	0.853197	34.4545	26.9056	266.364	637.273	82
Analyzed	CG42328	C3G	31116	y[1] v[1]; P{y[+t7.7] v[+t1.8]=TRiP.JF01589}attP2	917.857	683.571	-24.7442	0.70914	33.7143	29.4669	275	642.857	56.333
Analyzed	CG42829	CadN2	27508	y[1] v[1]; P{y[+t7.7] v[+t1.8]=TRiP.JF02658}attP2	1015	703	-30.8597	0.869396	38.9	27.0098	371.5	643.5	72.625
Analyzed	CG7563	CalpA	29455	y[1] v[1]; P{y[+t7.7] v[+t1.8]=TRiP.JF03391}attP2	973.929	666.071	-32.4383	0.931301	36.2143	28.0137	334.643	639.286	86
Analyzed	CG11282	caps	28020	y[1] v[1]; P{y[+t7.7] v[+t1.8]=TRiP.JF02854}attP2	985.625	776.562	-19.7697	1.87858	32.125	33.0389	322.188	663.438	87.667
Analyzed	CG3399	capu	32922	y[1] sc[*] v[1]; P{y[+t7.7] v[+t1.8]=TRiP.HMS00712}attP2/TM3, Sb[1]	996	726.5	-27.3595	1.57812	35	33.747	377.5	618.5	27.3333
Analyzed	CG6703	CASK	27556	y[1] v[1]; P{y[+t7.7] v[+t1.8]=TRiP.JF02710}attP2	872.778	640	-25.6763	0.976821	39.5556	23.4189	310.556	562.222	79.5
Analyzed	CG7037	Cbl	27500	y[1] v[1]; P{y[+t7.7] v[+t1.8]=TRiP.JF02650}attP2	938.125	738.125	-20.6071	1.13547	33.75	30.0496	357.5	580.625	54.333
Analyzed	CG30106	CCHa1-R	27669	y[1] v[1]; P{y[+t7.7] v[+t1.8]=TRiP.JF02748}attP2	877.692	597.308	-30.3961	0.874497	39.0769	23.0881	288.077	589.615	77.167
Analyzed	CG42301	CCKLR-17D1	27494	y[1] v[1]; P{y[+t7.7] v[+t1.8]=TRiP.JF02644}attP2	887.159	780.909	-9.50271	1.18556	37.75	27.0378	321.932	565.227	86.292
Analyzed	CG31973	Cda5	55996	y[1] sc[*] v[1]; P{y[+t7.7] v[+t1.8]=TRiP.HMC04292}attP40	973.571	855.357	-9.97051	1.10203	31.6429	33.3384	313.214	660.357	80.458
Analyzed	CG1471	CDase	36764	y[1] sc[*] v[1]; P{y[+t7.7] v[+t1.8]=TRiP.HMS03025}attP2/TM3, Sb[1]	1009.62	822.692	-17.8516	0.82863	30.3077	35.4021	347.692	661.923	83.167
Analyzed	CG7207	cert	35579	y[1] sc[*] v[1]; P{y[+t7.7] v[+t1.8]=TRiP.GL00157}attP2	1027.5	781.25	-23.2596	0.924166	30.0833	37.1207	346.25	681.25	0
Analyzed	CG10202	CG10202	62498	y[1] v[1]; P{y[+t7.7] v[+t1.8]=TRiP.HMJ24022}attP40/CyO	813.333	345.667	-56.9197	0.886484	32.4	28.5697	346.667	466.667	47.375
Analyzed	CG10249	CG10249	33432	y[1] sc[*] v[1]; P{y[+t7.7] v[+t1.8]=TRiP.HMS00319}attP2	888.75	611.667	-30.9902	0.963316	26.1667	34.8367	277.083	611.667	66.917
Analyzed	CG10924	CG10924	36915	y[1] sc[*] v[1]; P{y[+t7.7] v[+t1.8]=TRiP.HMS00200}attP2	911.25	620.833	-29.8881	1.01502	38.0833	27.4054	322.917	588.333	72.375
Analyzed	CG11085	CG11085	42516	y[1] v[1]; P{y[+t7.7] v[+t1.8]=TRiP.HMJ02082}attP40	841.111	616.389	-23.5275	1.01822	40.0556	22.1492	326.389	514.722	73.792
Analyzed	CG11266	CG11266	44431	y[1] sc[*] v[1]; P{y[+t7.7] v[+t1.8]=TRiP.GLC01382}attP2/TM3, Sb[1]	851.705	697.727	-17.8841	1.08841	36.7955	24.5352	265.795	585.909	80.042
Analyzed	CG11658	CG11658	31373	y[1] v[1]; P{y[+t7.7] v[+t1.8]=TRiP.JF01340}attP2	934.545	669.545	-28.1689	0.921985	33.3636	30.0618	304.091	630.455	74.833
Analyzed	CG11700	CG11700	32933	y[1] sc[*] v[1]; P{y[+t7.7] v[+t1.8]=TRiP.HMS00726}attP2	885.312	642.812	-25.406	1.16624	37	25.6273	307.812	577.5	66
Analyzed	CG11843	CG11843	44092	y[1] sc[*] v[1]; P{y[+t7.7] v[+t1.8]=TRiP.HMS02809}attP2	994.545	765.909	-22.0436	0.901979	31.8182	33.3385	331.182	675	88.25
Analyzed	CG12069	CG12069	27677	y[1] v[1]; P{y[+t7.7] v[+t1.8]=TRiP.JF02756}attP2	1060.62	849.062	-19.7293	0.990303	30.125	38.0926	385.625	676	76.458
Analyzed	CG12236	CG12236	31949	y[1] v[1]; P{y[+t7.7] v[+t1.8]=TRiP.JF02241}attP2	989.062	658.438	-33.4431	0.793589	38.5	27	341.25	647.812	94.583
Analyzed	CG12262	CG12262	32436	y[1] sc[*] v[1]; P{y[+t7.7] v[+t1.8]=TRiP.HMS00434}attP2	788.929	811.071	6.63437	1.33643	43	19.0935	271.429	517.5	77.792
Analyzed	CG12301	CG12301	29412	y[1] v[1]; P{y[+t7.7] v[+t1.8]=TRiP.JF03348}attP2	891.364	847.273	-4.02839	0.742748	33.0909	28.4564	251.364	640	61.167
Analyzed	CG12858	CG12858	29418	y[1] v[1]; P{y[+t7.7] v[+t1.8]=TRiP.JF03354}attP2	989.643	670.714	-31.6658	1.03729	33.2857	32.2632	356.786	632.857	97.292
Analyzed	CG13008	CG13008	62343	y[1] v[1]; P{y[+t7.7] v[+t1.8]=TRiP.HMJ23700}attP40	963.333	615.333	-35.8892	1.0918	30.3333	33.8464	328.667	634.667	89.417
Analyzed	CG13229	CG13229	29419	y[1] v[1]; P{y[+t7.7] v[+t1.8]=TRiP.JF03355}attP2	977.692	695.769	-25.9789	1.16274	31.9231	33.0016	341.923	635.769	90.917
Analyzed	CG13282	CG13282	60434	y[1] v[1]; P{y[+t7.7] v[+t1.8]=TRiP.HMJ22747}attP40	941.667	804.167	-14.2442	1.23032	34.1667	30.4143	332.5	609.167	94.75
Analyzed	CG13561	CG13561	50995	y[1] v[1]; P{y[+t7.7] v[+t1.8]=TRiP.HMJ21108}attP40	1125.31	469.062	-57.6334	1.08229	25.6875	56.6194	570.625	554.688	33.0417
Analyzed	CG13579	CG13579	28644	y[1] v[1]; P{y[+t7.7] v[+t1.8]=TRiP.JF03059}attP2	938.125	663.594	-25.823	0.888758	37.7188	26.3718	312.812	625.312	75.708
Analyzed	CG13594	CG13594	40891	y[1] sc[*] v[1]; P{y[+t7.7] v[+t1.8]=TRiP.HMS02139}attP2	1027.27	699.545	-31.6567	0.71097	35.7727	29.6993	373.409	653.864	78.625
Analyzed	CG13604	CG13604	28597	y[1] v[1]; P{y[+t7.7] v[+t1.8]=TRiP.HM05085}attP2/TM3, Sb[1]	994.5	582	-40.8385	1.11518	30.8	37.3364	346.5	648	53.458
Analyzed	CG13624	CG13624	25983	y[1] v[1]; P{y[+t7.7] v[+t1.8]=TRiP.JF02005}attP2	1005.36	578.571	-41.9035	0.820155	36.7857	29.1646	385.714	619.643	41.9167
Analyzed	CG14010	CG14010	38229	y[1] sc[*] v[1]; P{y[+t7.7] v[+t1.8]=TRiP.HMS01673}attP40	795.588	662.647	-16.0844	1.4915	29.2353	27.732	163.824	631.765	77.917
Analyzed	CG14050	CG14050	27073	y[1] v[1]; P{y[+t7.7] v[+t1.8]=TRiP.JF02418}attP2/TM3, Sb[1]	1005.5	857.5	-13.1472	0.884526	37.2	28.5758	377	628.5	64.708
Analyzed	CG14132	CG14132	57198	y[1] sc[*] v[1]; P{y[+t7.7] v[+t1.8]=TRiP.HMC04580}attP40	1020.33	702.333	-31.3662	1.00294	34.9333	29.9561	378.333	642	95.292
Analyzed	CG14153	CG14153	58254	y[1] v[1]; P{y[+t7.7] v[+t1.8]=TRiP.HMJ22317}attP40	832.619	765.952	-6.6034	0.793953	35.7619	24.4518	228.571	604.048	0
Analyzed	CG14164	CG14164	34927	y[1] sc[*] v[1]; P{y[+t7.7] v[+t1.8]=TRiP.HMS01276}attP2	863.333	627.222	-29.2723	1.21613	37.6667	23.7724	281.111	582.222	0
Analyzed	CG14535	CG14535	62335	y[1] v[1]; P{y[+t7.7] v[+t1.8]=TRiP.HMJ23692}attP40/CyO	918.636	819.773	-10.5895	1.13364	31.2273	30.6088	321.591	597.045	95.292
Analyzed	CG14741	CG14741	63037	y[1] v[1]; P{y[+t7.7] v[+t1.8]=TRiP.HMS05311}attP40	729	457	-25.5401	0.594962	40.8	17.9251	238	491	0
Analyzed	CG14777	CG14777	57473	y[1] sc[*] v[1]; P{y[+t7.7] v[+t1.8]=TRiP.HMC04784}attP40	891.5	765.5	-13.6755	0.782275	37.8	25.1686	264	627.5
Analyzed	CG15097	CG15097	31159	y[1] v[1]; P{y[+t7.7] v[+t1.8]=TRiP.JF01652}attP2	1043	682.333	-33.1895	1.05802	37.4	29.8376	414	629	63.958
Analyzed	CG15143	CG15143	61961	y[1] v[1]; P{y[+t7.7] v[+t1.8]=TRiP.HMJ23587}attP40/CyO	901.429	497.857	-44.138	0.97177	36.9286	25.3148	275	626.429	70.208
Analyzed	CG15145	CG15145	54837	y[1] v[1]; P{y[+t7.7] v[+t1.8]=TRiP.HMJ21556}attP40	1004.5	899	-9.82168	1.01621	33	33.1707	370.5	634	78.125
Analyzed	CG15269	CG15269	51506	y[1] sc[*] v[1]; P{y[+t7.7] v[+t1.8]=TRiP.HMC03273}attP2	1039.58	801.25	-23.024	0.836986	28.4167	60.7746	374.167	665.417	95.583
Analyzed	CG15365	CG15365	36856	y[1] sc[*] v[1]; P{y[+t7.7] v[+t1.8]=TRiP.HMS00293}attP2	930.625	677.5	-25.9878	1.08653	30.125	34.2378	333.438	597.188	30.8333
Analyzed	CG15414	CG15414	34010	y[1] sc[*] v[1]; P{y[+t7.7] v[+t1.8]=TRiP.HMS00975}attP2/TM3, Sb[1]	1030.62	572.812	-43.8351	1.01143	34.5625	30.626	368.125	662.5	60
Analyzed	CG15478	CG15478	61895	y[1] v[1]; P{y[+t7.7] v[+t1.8]=TRiP.HMJ23450}attP40	886.667	757.778	-14.4493	0.925634	36.5556	24.7212	285	601.667	77.833
Analyzed	CG15479	CG15479	44024	y[1] sc[*] v[1]; P{y[+t7.7] v[+t1.8]=TRiP.HMS02739}attP2	870.5	747.5	-12.0472	0.800892	39.5	23.0825	319.5	551	60.083
Analyzed	CG15628	CG15628	34555	y[1] sc[*] v[1]; P{y[+t7.7] v[+t1.8]=TRiP.HMS01027}attP2	925.938	577.5	-36.9858	1.23154	34.1875	29.5535	286.562	622.812	67.583
Analyzed	CG15630	CG15630	42589	y[1] sc[*] v[1]; P{y[+t7.7] v[+t1.8]=TRiP.HMS02421}attP40	868.409	630.909	-24.4512	1.18101	33.0909	28.4972	261.364	607.045	89.167
Analyzed	CG15696	CG15696	57282	y[1] sc[*] v[1]; P{y[+t7.7] v[+t1.8]=TRiP.HMC04679}attP40	930.312	642.812	-31.7633	1.11515	39.75	24.7878	319.375	610.938	62.708
Analyzed	CG15765	CG15765	29421	y[1] v[1]; P{y[+t7.7] v[+t1.8]=TRiP.JF03357}attP2	934.5	723	-20.7367	0.78276	31.9	31.9363	336.5	598	86.542
Analyzed	CG15824	CG15824	57292	y[1] v[1]; P{y[+t7.7] v[+t1.8]=TRiP.HMJ21321}attP40	874.375	420	-50.4988	1.17446	29.625	30.9012	249.375	625	31.1667
Analyzed	CG16716	CG16716	62488	y[1] v[1]; P{y[+t7.7] v[+t1.8]=TRiP.HMJ23972}attP40/CyO	810.455	599.318	-24.8975	0.733521	30.2273	31.02	199.773	610.682	88.625
Analyzed	CG16723	CG16723	60453	y[1] v[1]; P{y[+t7.7] v[+t1.8]=TRiP.HMJ22810}attP40	1027.22	757.778	-25.6594	0.784648	32.5556	33.7316	375.556	651.667	79.083
Analyzed	CG16820	CG16820	56027	y[1] sc[*] v[1]; P{y[+t7.7] v[+t1.8]=TRiP.HMC04323}attP40	999.167	806.667	-19.4363	1.08892	29	34.6172	322.083	677.083	76.75
Analyzed	CG16974	CG16974	42590	y[1] sc[*] v[1]; P{y[+t7.7] v[+t1.8]=TRiP.HMS02422}attP40	569.167	403.75	-20.908	0.925305	40	15.1	170.833	398.333	69.708
Analyzed	CG17265	CG17265	36687	y[1] sc[*] v[1]; P{y[+t7.7] v[+t1.8]=TRiP.HMS01575}attP2/TM3, Sb[1]	983.864	748.636	-17.8118	1.49194	30.3636	38.3491	358.182	625.682	85.542
Analyzed	CG17364	CG17364	58319	y[1] v[1]; P{y[+t7.7] v[+t1.8]=TRiP.HMJ22444}attP40/CyO	912.692	521.154	-42.3202	0.84472	36.4615	25.9685	302.692	610	72.083
Analyzed	CG17724	CG17724	62409	y[1] v[1]; P{y[+t7.7] v[+t1.8]=TRiP.HMJ23832}attP40/CyO	899.091	696.818	-19.6562	0.811247	33.8182	27.5728	299.091	600	90.5
Analyzed	CG18754	CG18754	55348	y[1] sc[*] v[1]; P{y[+t7.7] v[+t1.8]=TRiP.HMC04035}attP40	827.812	801.562	-2.60621	0.815494	38	22.4971	288.438	539.375	104.417
Analyzed	CG18769	CG18769	42580	y[1] sc[*] v[1]; P{y[+t7.7] v[+t1.8]=TRiP.HMS01927}attP40	960	710.5	-24.5392	0.700984	36.3	27.3677	367.5	592.5	56.083
Analyzed	CG2258	CG2258	36850	y[1] sc[*] v[1]; P{y[+t7.7] v[+t1.8]=TRiP.GL01108}attP2	944.167	770.417	-9.13004	1.40866	27.6667	38.2657	400.833	543.333	83.083
Analyzed	CG2658	CG2658	31100	y[1] v[1]; P{y[+t7.7] v[+t1.8]=TRiP.JF01565}attP2	907.143	551.786	-38.0639	0.820472	36.0714	25.6858	285.714	621.429	80.333
Analyzed	CG2694	CG2694	43969	y[1] v[1]; P{y[+t7.7] v[+t1.8]=TRiP.GL01579}attP2	838.462	531.538	-36.1665	0.957442	33.8462	25.9235	231.538	606.923	82.417
Analyzed	CG2816	CG2816	41630	y[1] v[1]; P{y[+t7.7] v[+t1.8]=TRiP.GL01212}attP40	896.389	704.444	-20.5413	1.15196	35.8889	26.1999	269.722	628.056	88.25
Analyzed	CG2865	CG2865	43165	y[1] v[1]; P{y[+t7.7] v[+t1.8]=TRiP.GL01507}attP2	1029.06	558.125	-44.1087	1.59999	30.875	36.4312	369.688	659.375	69.958
Analyzed	CG30089	CG30089	28321	y[1] v[1]; P{y[+t7.7] v[+t1.8]=TRiP.JF02953}attP2	900.417	730.833	-15.4463	0.776284	32.3333	29.4219	277.083	623.333	58.25
Analyzed	CG30122	CG30122	55209	y[1] sc[*] v[1]; P{y[+t7.7] v[+t1.8]=TRiP.HMC03927}attP40	960	1421.67	66.5311	0.839818	28.6667	57.592	431.667	528.333	0
Analyzed	CG30456	CG30456	31208	y[1] v[1]; P{y[+t7.7] v[+t1.8]=TRiP.JF01726}attP2	970.625	773.125	-19.0767	1.26182	37.75	26.7347	351.25	619.375	55.333
Analyzed	CG30463	CG30463	50617	y[1] v[1]; P{y[+t7.7] v[+t1.8]=TRiP.HMC02984}attP2/TM3, Sb[1]	1106.76	741.765	-32.2293	1.41637	31.1176	61.8578	465.294	641.471	70.583
Analyzed	CG30466	CG30466	31372	y[1] v[1]; P{y[+t7.7] v[+t1.8]=TRiP.JF01339}attP2	935.625	563.438	-39.164	0.700822	34.5	28.0135	286.25	649.375	78.75
Analyzed	CG31016	CG31016	42911	y[1] sc[*] v[1]; P{y[+t7.7] v[+t1.8]=TRiP.HMS02604}attP40	1009.62	727.308	-26.3966	1.01425	36	33.7542	376.538	633.077	104.25
Analyzed	CG31140	CG31140	36746	y[1] sc[*] v[1]; P{y[+t7.7] v[+t1.8]=TRiP.HMS03006}attP2/TM3, Sb[1]	571.562	489.062	-12.8082	1.56077	14.1875	66.6208	336.5	619.643	31.7083
Analyzed	CG31148	CG31148	38379	y[1] v[1]; P{y[+t7.7] v[+t1.8]=TRiP.HMS01848}attP40	945.357	718.214	-22.7175	0.93437	32.5	30.2281	344.754	600.604	66.08
Analyzed	CG31176	CG31176	60401	y[1] v[1]; P{y[+t7.7] v[+t1.8]=TRiP.HMJ22659}attP40/CyO	975	551	-47.479	0.857909	22.5333	64.426	333	642	48.3333
Analyzed	CG31414	CG31414	38970	y[1] sc[*] v[1]; P{y[+t7.7] v[+t1.8]=TRiP.HMS01885}attP2	989.062	735.625	-25.5935	0.962247	32.875	30.4379	320	669.062	101.5
Analyzed	CG31431	CG31431	57038	y[1] sc[*] v[1]; P{y[+t7.7] v[+t1.8]=TRiP.HMS04483}attP40	871.905	792.143	-8.38555	0.859272	40.4286	21.8625	268.095	603.81	93.583
Analyzed	CG31646	CG31646	28654	y[1] v[1]; P{y[+t7.7] v[+t1.8]=TRiP.JF03069}attP2	1005.71	699.643	-29.3866	0.721881	33.0714	30.8907	348.214	657.5	63.083
Analyzed	CG31690	CG31690	44525	y[1] sc[*] v[1]; P{y[+t7.7] v[+t1.8]=TRiP.HMC02919}attP2	935.312	916.25	-1.13102	0.973309	30.1875	31.8521	280	655.312	97
Analyzed	CG31708	CG31708	38227	y[1] sc[*] v[1]; P{y[+t7.7] v[+t1.8]=TRiP.HMS01671}attP40	1010.77	806.923	-19.1629	0.774751	43.2308	25.4689	378.077	632.692	54.583
Analyzed	CG31760	CG31760	51838	y[1] sc[*] v[1]; P{y[+t7.7] v[+t1.8]=TRiP.HMC03410}attP2	1027.5	823.571	-19.5829	0.740882	36.6429	31.0995	370.357	657.143	102.917
Analyzed	CG31221	CG31221	41953	y[1] sc[*] v[1]; P{y[+t7.7] v[+t1.8]=TRiP.HMS02350}attP2	1036.11	781.111	-22.9255	0.902876	28.3333	44.7475	391.111	645	61.083
Analyzed	CG31809	CG31809	29424	y[1] v[1]; P{y[+t7.7] v[+t1.8]=TRiP.JF03360}attP2	1036.25	814.688	-21.2357	1.2143	34.875	31.4515	380.938	655.312	0
Analyzed	CG31814	CG31814	31740	y[1] v[1]; P{y[+t7.7] v[+t1.8]=TRiP.HM04050}attP2	782.25	443.75	-42.186	0.881535	38.3	20.9065	228.5	553.75	0
Analyzed	CG32026	CG32026	53953	y[1] v[1]; P{y[+t7.7] v[+t1.8]=TRiP.HMJ21319}attP40	838.571	589.286	-27.1599	1.05298	31.7143	27.0008	213.214	625.357	72.5
Analyzed	CG32052	CG32052	36763	y[1] sc[*] v[1]; P{y[+t7.7] v[+t1.8]=TRiP.HMS03024}attP2	1082.86	583.929	-45.2826	0.917748	30.7857	36.9753	421.786	661.071	0
Analyzed	CG32082	CG32082	44526	y[1] sc[*] v[1]; P{y[+t7.7] v[+t1.8]=TRiP.HMC02920}attP2	687.5	535.312	-22.053	1.09708	4.0625	202.797	229.167	458.333	88.125
Analyzed	CG32085	CG32085	31488	y[1] v[1]; P{y[+t7.7] v[+t1.8]=TRiP.JF01333}attP2	677.273	400.455	-41.2556	1.10197	5.18182	179.6	225.758	451.515	49.875
Analyzed	CG3226	CG3226	32875	y[1] sc[*] v[1]; P{y[+t7.7] v[+t1.8]=TRiP.HMS00662}attP2	999.167	775.833	-19.5351	0.939863	26.9167	41.1753	392.5	606.667	40.9167
Analyzed	CG32264	CG32264	28340	y[1] v[1]; P{y[+t7.7] v[+t1.8]=TRiP.JF02975}attP2/TM3, Sb[1]	611.25	624.688	9.4558	1.20699	48.1875	12.8524	186.562	424.688	64.667
Analyzed	CG32369	CG32369	64028	y[1] sc[*] v[1]; P{y[+t7.7] v[+t1.8]=TRiP.HMS05364}attP40	933.333	712.5	-22.8712	1.19796	29.3333	33.4603	278.333	655	49.2917
Analyzed	CG32392	CG32392	62450	y[1] v[1]; P{y[+t7.7] v[+t1.8]=TRiP.HMJ23928}attP40/CyO	958.333	762.333	-21.7922	0.817077	30.4	48.4134	316	642.333	5.2917
Analyzed	CG32479	CG32479	36897	y[1] sc[*] v[1]; P{y[+t7.7] v[+t1.8]=TRiP.GL01087}attP2	900	680	-22.3484	1.37421	40.9286	23.3992	305.357	594.643	81
Analyzed	CG3257	CG3257	28611	y[1] v[1]; P{y[+t7.7] v[+t1.8]=TRiP.JF03026}attP2	751.667	830	13.2926	1.16083	38.6667	19.6446	184.167	567.5	0
Analyzed	CG32700	CG32700	57719	y[1] sc[*] v[1]; P{y[+t7.7] v[+t1.8]=TRiP.HMC04908}attP40	830.909	600.455	-27.0439	1.15129	29.9091	29.276	195	635.909	90
Analyzed	CG32758	CG32758	38225	y[1] sc[*] v[1]; P{y[+t7.7] v[+t1.8]=TRiP.HMS01669}attP40	950.278	692.222	-26.4547	1.24574	32.2222	33.7289	315.278	635	78.5
Analyzed	CG3294	CG3294	27296	y[1] v[1]; P{y[+t7.7] v[+t1.8]=TRiP.JF02606}attP2	972.5	576.25	-40.6102	0.886241	33.4375	30.5644	323.125	649.375	57.5
Analyzed	CG33080	CG33080	42554	y[1] v[1]; P{y[+t7.7] v[+t1.8]=TRiP.HMJ02127}attP40	940	834.828	-10.0508	0.878436	40.8621	24.9608	342.586	597.414	96.167
Analyzed	CG33108	CG33108	61884	y[1] v[1]; P{y[+t7.7] v[+t1.8]=TRiP.HMJ23374}attP40	970.938	830	-14.3787	0.836436	37	26.8929	335.312	635.625	95.458
Analyzed	CG33181	CG33181	38334	y[1] v[1]; P{y[+t7.7] v[+t1.8]=TRiP.HMS01801}attP2	1143.44	1026.56	-10.1065	1.44998	31.25	50.8554	523.438	620	13.0833
Analyzed	CG3326	CG3326	38266	y[1] sc[*] v[1]; P{y[+t7.7] v[+t1.8]=TRiP.HMS01711}attP40	844.375	774.688	-6.74837	0.808094	36.375	24.4611	226.875	617.5	98.583
Analyzed	CG33275	CG33275	31221	y[1] v[1]; P{y[+t7.7] v[+t1.8]=TRiP.JF01776}attP2	882	608.5	-28.1092	1.09597	38.2	24.1127	271.5	610.5	0
Analyzed	CG3328	CG3328	55211	y[1] v[1]; P{y[+t7.7] v[+t1.8]=TRiP.GLC01379}attP2	944.531	756.406	-19.3669	0.825467	32.7188	30.0354	292.188	652.344	75.042
Analyzed	CG33688	CG33688	62418	y[1] v[1]; P{y[+t7.7] v[+t1.8]=TRiP.HMJ23841}attP40/CyO	906.818	690	-23.9715	0.710459	33.1818	30.3782	286.818	620	88.833
Analyzed	CG33696	CG33696	28380	y[1] v[1]; P{y[+t7.7] v[+t1.8]=TRiP.JF03017}attP2	956.875	669.062	-29.1606	0.776872	38.8125	26.3254	332.812	624.062	72.083
Analyzed	CG34109	CG34109	57849	y[1] v[1]; P{y[+t7.7] v[+t1.8]=TRiP.HMJ21896}attP40	1013	610.5	-36.8224	0.927214	26.7	40.6307	332.5	680.5	68.333
Analyzed	CG34340	CG34340	57723	y[1] sc[*] v[1]; P{y[+t7.7] v[+t1.8]=TRiP.HMC04912}attP40	1047.06	822.647	-19.9354	1.38649	31.5294	40.8677	415.294	631.765	77.583
Analyzed	CG34354	CG34354	27301	y[1] v[1]; P{y[+t7.7] v[+t1.8]=TRiP.JF02620}attP2	1006.67	581.25	-40.5319	1.24105	34.75	30.4546	348.333	658.333	75.583
Analyzed	CG34356	CG34356	50912	y[1] v[1]; P{y[+t7.7] v[+t1.8]=TRiP.HMJ03136}attP40	905.625	691.875	-22.6915	0.729695	35.25	26.6865	256.25	649.375	96.625
Analyzed	CG34411	CG34411	28655	y[1] v[1]; P{y[+t7.7] v[+t1.8]=TRiP.JF03070}attP2	902.5	570.357	-36.2987	0.721666	36.0714	26.5674	261.786	640.714	56.375
Analyzed	CG34417	CG34417	58278	y[1] v[1]; P{y[+t7.7] v[+t1.8]=TRiP.HMJ22361}attP40	910	382.5	-50.0512	0.870715	31.5	29.0045	302.5	607.5	80.375
Analyzed	CG3476	CG3476	58148	y[1] v[1]; P{y[+t7.7] v[+t1.8]=TRiP.HMJ22099}attP40	889.706	664.118	-21.925	0.763063	35.7647	26.1074	283.824	605.882	105.667
Analyzed	CG3544	CG3544	62986	y[1] v[1]; P{y[+t7.7] v[+t1.8]=TRiP.HMJ30063}attP40	897.222	688.611	-22.4778	0.954748	36.1111	25.9868	271.528	623.611	119.583
Analyzed	CG3558	CG3558	44636	y[1] sc[*] v[1]; P{y[+t7.7] v[+t1.8]=TRiP.GLC01397}attP2	990.667	807.333	-18.3051	1.33574	27.2	37.5713	326.333	664.333
Analyzed	CG3822	CG3822	25852	y[1] v[1]; P{y[+t7.7] v[+t1.8]=TRiP.JF01873}attP2	857.812	610.625	-29.294	1.24119	31.6875	27.6131	233.125	626.562	94.125
Analyzed	CG3835	CG3835	53355	y[1] sc[*] v[1]; P{y[+t7.7] v[+t1.8]=TRiP.HMC03584}attP40	841.562	567.812	-32.3994	0.687597	30.8125	28.6243	217.5	624.062	86.292
Analyzed	CG4049	CG4049	34077	y[1] sc[*] v[1]; P{y[+t7.7] v[+t1.8]=TRiP.HMS00584}attP2/TM3, Sb[1]	589.167	606.25	5.20352	1.1069	35.5833	17.8391	119.583	469.583	95
Analyzed	CG4133	CG4133	28370	y[1] v[1]; P{y[+t7.7] v[+t1.8]=TRiP.JF03007}attP2	940	610	-34.7888	1.0451	36.625	28.2257	351.875	588.125	63
Analyzed	CG42321	CG42321	28558	y[1] v[1]; P{y[+t7.7] v[+t1.8]=TRiP.HM05044}attP2/TM3, Sb[1]	1087	887.5	-17.8986	0.895606	28.5	39.3895	403.5	683.5	67.575
Analyzed	CG42340	CG42340	27257	y[1] v[1]; P{y[+t7.7] v[+t1.8]=TRiP.JF02564}attP2	836.875	586.875	-24.4544	0.898892	33	26.7427	255.312	581.562	60.583
Analyzed	CG42342	CG42342	28648	y[1] v[1]; P{y[+t7.7] v[+t1.8]=TRiP.JF03063}attP2	887.5	761.667	-12.5185	1.04538	39.8333	23.1481	294.167	593.333	62.492
Analyzed	CG42353	CG42353	36853	y[1] sc[*] v[1]; P{y[+t7.7] v[+t1.8]=TRiP.GL01112}attP2	915	740.625	-17.7664	1.01757	32.5	29.9263	296.875	618.125	85.45
Analyzed	CG4238	CG4238	36086	y[1] sc[*] v[1]; P{y[+t7.7] v[+t1.8]=TRiP.GL00505}attP2/TM3, Sb[1]	1006.25	734.25	-27.0719	1.26602	31.35	34.6907	343.5	662.75	101.25
Analyzed	CG42458	CG42458	42506	y[1] v[1]; P{y[+t7.7] v[+t1.8]=TRiP.HMJ02071}attP40	942.8	825	-10.4949	1.05626	31.76	33.059	330	614	86.292
Analyzed	CG42507	CG42507	62191	y[1] sc[*] v[1]; P{y[+t7.7] v[+t1.8]=TRiP.HMC05198}attP40	1013.75	720.625	-27.135	0.995789	27.25	38.8381	321.25	692.5	53.333
Analyzed	CG42575	CG42575	29408	y[1] v[1]; P{y[+t7.7] v[+t1.8]=TRiP.JF03344}attP2/TM3, Sb[1]	935.455	622.273	-33.1251	0.820142	40.1818	24.311	312.273	623.182	53.333
Analyzed	CG42594	CG42594	25888	y[1] v[1]; P{y[+t7.7] v[+t1.8]=TRiP.JF01929}attP2	829.107	772.321	-4.77715	0.893063	45.4643	18.5438	299.107	530	56.708
Analyzed	CG42666	CG42666	33665	y[1] sc[*] v[1]; P{y[+t7.7] v[+t1.8]=TRiP.HMS00075}attP2	800.312	749.688	-4.0991	0.709071	35.5	23.4374	219.375	580.938	73.417
Analyzed	CG42668	CG42668	34743	y[1] sc[*] v[1]; P{y[+t7.7] v[+t1.8]=TRiP.HMS01223}attP2	955	517.5	-41.6478	1.09206	34.125	29.5193	430.625	524.375	33.25
Analyzed	CG4267	CG4267	32332	y[1] sc[*] v[1]; P{y[+t7.7] v[+t1.8]=TRiP.HMS00323}attP2	849.375	563.75	-30.8135	1.03875	33.5625	25.9443	249.375	600	100.292
Analyzed	CG42673	CG42673	36629	y[1] sc[*] v[1]; P{y[+t7.7] v[+t1.8]=TRiP.GL00589}attP2	946.333	767	-19.2002	1.58283	30.5333	31.6015	286.667	659.667	84.083
Analyzed	CG42684	CG42684	54056	y[1] sc[*] v[1]; P{y[+t7.7] v[+t1.8]=TRiP.HMS03717}attP40	867.5	630.5	-25.7738	1.08748	32.4	28.1032	243	624.5	71.667
Analyzed	CG4270	CG4270	60040	y[1] sc[*] v[1]; P{y[+t7.7] v[+t1.8]=TRiP.HMC05033}attP40	991	875	-11.3936	1.16374	33.3333	31.0748	331.667	665.667	89.833
Analyzed	CG4313	CG4313	32960	y[1] sc[*] v[1]; P{y[+t7.7] v[+t1.8]=TRiP.HMS00755}attP2/TM3, Sb[1]	774.5	554.5	-27.5027	0.707685	44.1	18.7673	221.5	553	0
Analyzed	CG4341	CG4341	44509	y[1] sc[*] v[1]; P{y[+t7.7] v[+t1.8]=TRiP.HMC02899}attP2	865	672.5	-21.1791	1.90544	41.25	21.1149	338.75	526.25	90.25
Analyzed	CG43658	CG43658	28754	y[1] v[1]; P{y[+t7.7] v[+t1.8]=TRiP.JF03182}attP2	695.882	571.176	-12.9441	0.901771	33.2353	22.082	231.471	464.412	79.083
Analyzed	CG43729	CG43729	52999	y[1] v[1]; P{y[+t7.7] v[+t1.8]=TRiP.HMJ21714}attP40	1029.17	799.583	-21.4261	0.773194	30.9167	35.6646	376.667	652.5	58.542
Analyzed	CG43783	CG43783	43226	y[1] v[1]; P{y[+t7.7] v[+t1.8]=TRiP.GL01571}attP2	1115.71	815.357	-26.2722	0.943058	28.2143	42.8291	426.429	689.286	97.083
Analyzed	CG43897	CG43897	31560	y[1] v[1]; P{y[+t7.7] v[+t1.8]=TRiP.JF01132}attP2	877.667	789.667	-7.68296	1.41869	38.4667	23.5581	283	594.667	67.042
Analyzed	CG4393	CG4393	58087	y[1] v[1]; P{y[+t7.7] v[+t1.8]=TRiP.HMJ21979}attP40	1049.05	733.571	-28.9019	1.6583	26.4762	59.3514	385.952	648.333	59.083
Analyzed	CG44005	CG44005	63012	y[1] v[1]; P{y[+t7.7] v[+t1.8]=TRiP.HMJ30089}attP40	782.273	590.455	-24.2589	0.783169	38.5455	20.7638	232.727	549.545	67.25
Analyzed	CG4415	CG4415	35613	y[1] sc[*] v[1]; P{y[+t7.7] v[+t1.8]=TRiP.GL00456}attP2	955.588	711.471	-25.6369	0.889835	32.8235	30.5043	305.882	626.765	82.5
Analyzed	CG44153	CG44153	33350	y[1] sc[*] v[1]; P{y[+t7.7] v[+t1.8]=TRiP.HMS00218}attP2	670	713.125	11.9889	1.24986	37.5625	19.2763	208.438	461.562	93.125
Analyzed	CG44837	CG44837	44021	y[1] sc[*] v[1]; P{y[+t7.7] v[+t1.8]=TRiP.HMS02736}attP40	921.111	648.333	-30.1261	0.748651	31.7778	29.5993	285.556	635.556	75.542
Analyzed	CG45058	CG45058	61232	y[1] v[1]; P{y[+t7.7] v[+t1.8]=TRiP.HMJ23011}attP40	865.625	677.5	-20.2476	0.81058	33.25	26.2762	236.25	629.375	71.867
Analyzed	CG45186	CG45186	28914	y[1] v[1]; P{y[+t7.7] v[+t1.8]=TRiP.HM05125}attP2	884.375	719.375	-18.6212	0.850131	39.375	23.5967	331.875	552.5	84.75
Analyzed	CG4631	CG4631	61190	y[1] v[1]; P{y[+t7.7] v[+t1.8]=TRiP.HMJ22911}attP40	960.938	620.625	-35.2805	1.02167	35.875	29.0129	304.688	656.25	72.5
Analyzed	CG4678	CG4678	44491	y[1] v[1]; P{y[+t7.7] v[+t1.8]=TRiP.HMC02413}attP2	718.333	674.242	1.11455	0.927252	41.9394	17.9	190.909	527.424	81.958
Analyzed	CG4822	CG4822	25894	y[1] v[1]; P{y[+t7.7] v[+t1.8]=TRiP.JF01935}attP2	871.842	694.474	-20.0491	0.992489	31.9474	28.0675	258.947	612.895	59.667
Analyzed	CG4839	CG4839	55891	y[1] sc[*] v[1]; P{y[+t7.7] v[+t1.8]=TRiP.HMC04168}attP2	836.786	660.714	-19.2013	0.945341	36.7143	24.0293	223.929	612.857	74.625
Analyzed	CG4896	CG4896	62885	y[1] v[1]; P{y[+t7.7] v[+t1.8]=TRiP.HMJ24125}attP40	996.111	452.222	-53.8085	0.894731	29.5	39.4521	340	656.111	29.875
Analyzed	CG4911	CG4911	31062	y[1] v[1]; P{y[+t7.7] v[+t1.8]=TRiP.JF01511}attP2	795	566.5	-21.5312	0.70031	40	20.8149	260	535	45.625
Analyzed	CG5001	CG5001	32392	y[1] sc[*] v[1]; P{y[+t7.7] v[+t1.8]=TRiP.HMS00386}attP2	892.5	586.944	-34.2999	1.60037	25.3889	36.38	213.333	679.167	80.625
Analyzed	CG5004	CG5004	62296	y[1] v[1]; P{y[+t7.7] v[+t1.8]=TRiP.HMJ23653}attP40/CyO	868.75	471.25	-46.1262	0.764121	32.375	27.0972	216.25	652.5	62
Analyzed	CG5050	CG5050	62504	y[1] v[1]; P{y[+t7.7] v[+t1.8]=TRiP.HMJ24028}attP40/CyO	862.941	558.235	-33.2858	0.980035	27.8235	31.7381	357.353	505.588	49.3333
Analyzed	CG5144	CG5144	32393	y[1] sc[*] v[1]; P{y[+t7.7] v[+t1.8]=TRiP.HMS00387}attP2/TM3, Sb[1]	979.483	711.207	-27.1607	1.07674	28.7931	39.5756	359.31	620.172	0
Analyzed	CG5160	CG5160	27660	y[1] v[1]; P{y[+t7.7] v[+t1.8]=TRiP.JF02739}attP2	1017.37	687.105	-32.5011	1.18298	35.4211	30.6306	377.632	639.737	39.75
Analyzed	CG5174	CG5174	32881	y[1] sc[*] v[1]; P{y[+t7.7] v[+t1.8]=TRiP.HMS00669}attP2	1017.19	540.625	-47.1631	1.40009	29	38.9406	360	657.188	80.583
Analyzed	CG5204	CG5204	62865	y[1] sc[*] v[1]; P{y[+t7.7] v[+t1.8]=TRiP.HMC05338}attP40	961.25	872.917	-7.68859	0.736065	28.8333	37.4021	310	651.25	80.333
Analyzed	CG5246	CG5246	55410	y[1] sc[*] v[1]; P{y[+t7.7] v[+t1.8]=TRiP.HMC04098}attP40	896.25	721.25	-16.1884	0.946697	35.5	26.6629	276.25	620	82.667
Analyzed	CG5280	CG5280	58159	y[1] v[1]; P{y[+t7.7] v[+t1.8]=TRiP.HMJ22110}attP40	1024.47	802.632	-20.6865	0.879415	32.5789	34.5574	382.632	641.842	82
Analyzed	CG5321	CG5321	57482	y[1] sc[*] v[1]; P{y[+t7.7] v[+t1.8]=TRiP.HMC04795}attP40	877.5	585	-33.3214	0.651296	38	24.1775	265	612.5	0
Analyzed	CG5522	CG5522	31142	y[1] v[1]; P{y[+t7.7] v[+t1.8]=TRiP.JF01617}attP2	845	502.667	-39.8411	1.07945	27.4	32.9978	193.667	651.333	75
Analyzed	CG5830	CG5830	31746	y[1] v[1]; P{y[+t7.7] v[+t1.8]=TRiP.HM04056}attP2	928.71	654.355	-28.7863	0.72712	35.9032	27.7886	309.839	618.871	80
Analyzed	CG5897	CG5897	62922	y[1] v[1]; P{y[+t7.7] v[+t1.8]=TRiP.HMJ24162}attP40/CyO	975.952	789.048	-18.8045	0.651266	32.619	31.266	318.81	657.143	86.458
Analyzed	CG6024	CG6024	28625	y[1] v[1]; P{y[+t7.7] v[+t1.8]=TRiP.JF03040}attP2	891.562	697.812	-21.5696	0.854578	38.75	23.9821	285.938	605.625	71.292
Analyzed	CG6527	CG6527	50994	y[1] v[1]; P{y[+t7.7] v[+t1.8]=TRiP.HMJ21107}attP40	836.167	776.333	-5.4307	0.768206	38.4667	22.8932	268.5	567.667	70.708
Analyzed	CG6745	CG6745	41825	y[1] v[1]; P{y[+t7.7] v[+t1.8]=TRiP.GL01253}attP2	892.222	691.667	-22.0819	0.659576	37.6667	25.434	288.889	603.333	66.333
Analyzed	CG6847	CG6847	42908	y[1] sc[*] v[1]; P{y[+t7.7] v[+t1.8]=TRiP.HMS02601}attP40	836.316	754.474	-7.31976	0.933034	35.3158	25.4078	230.789	605.526	79.083
Analyzed	CG6927	CG6927	25895	y[1] v[1]; P{y[+t7.7] v[+t1.8]=TRiP.JF01936}attP2	937.5	565	-25.4262	0.961173	32.75	35.7429	405	532.5	17.8333
Analyzed	CG6966	CG6966	51409	y[1] v[1]; P{y[+t7.7] v[+t1.8]=TRiP.GLC01775}attP40	966.667	702.222	-26.6864	1.02855	31.4444	31.7167	325	641.667	89.75
Analyzed	CG7065	CG7065	32449	y[1] sc[*] v[1]; P{y[+t7.7] v[+t1.8]=TRiP.HMS00448}attP2	958	740	-20.5458	1.59601	35.3	32.2983	422	536	81.917
Analyzed	CG7084	CG7084	42767	y[1] v[1]; P{y[+t7.7] v[+t1.8]=TRiP.GL00723}attP2	841.333	828.333	1.91578	0.969516	36.3333	25.4519	256.667	584.667	51.1667
Analyzed	CG7094	CG7094	42653	y[1] sc[*] v[1]; P{y[+t7.7] v[+t1.8]=TRiP.HMS02489}attP2	962.857	707.5	-25.8699	0.880593	29.1429	34.7998	333.929	628.929	87.417
Analyzed	CG7099	CG7099	57542	y[1] sc[*] v[1]; P{y[+t7.7] v[+t1.8]=TRiP.HMC04859}attP40	923.462	786.538	-15.1541	1.51283	38.2308	25.2102	321.538	601.923	72.208
Analyzed	CG7194	CG7194	41855	y[1] v[1]; P{y[+t7.7] v[+t1.8]=TRiP.GL01283}attP2	883.75	666.25	-22.4792	0.982393	32.25	31.4364	250.312	633.438	50.125
Analyzed	CG7255	CG7255	58352	y[1] v[1]; P{y[+t7.7] v[+t1.8]=TRiP.HMS04333}attP40	1063.75	806.875	-23.9174	0.834929	34.375	33.6728	411.25	652.5	100.958
Analyzed	CG7289	CG7289	60460	y[1] v[1]; P{y[+t7.7] v[+t1.8]=TRiP.HMJ22829}attP40	936.923	568.462	-39.3022	0.929893	33.3846	30.3732	302.692	644.615	73
Analyzed	CG7367	CG7367	58157	y[1] v[1]; P{y[+t7.7] v[+t1.8]=TRiP.HMJ22108}attP40	1011.3	682.391	-30.9222	0.947624	32.9565	35.3192	398.696	612.609	79.917
Analyzed	CG7368	CG7368	57444	y[1] sc[*] v[1]; P{y[+t7.7] v[+t1.8]=TRiP.HMC04752}attP40	987.273	736.818	-24.7913	0.971573	27.1818	38.4177	347.727	639.545	114.917
Analyzed	CG7456	CG7456	28634	y[1] v[1]; P{y[+t7.7] v[+t1.8]=TRiP.JF03049}attP2	960.357	718.214	-25.1522	0.928479	35.9286	28.5938	329.286	631.071	79.75
Analyzed	CG7461	CG7461	55347	y[1] sc[*] v[1]; P{y[+t7.7] v[+t1.8]=TRiP.HMC04034}attP40	961.154	802.308	-14.6778	0.928726	34.7692	31.1022	329.231	631.923	91.5
Analyzed	CG7565	CG7565	38307	y[1] sc[*] v[1]; P{y[+t7.7] v[+t1.8]=TRiP.HMS01770}attP40	936.364	680	-26.442	0.889076	32.6364	30.6986	310	626.364	69.25
Analyzed	CG7616	CG7616	35191	y[1] sc[*] v[1]; P{y[+t7.7] v[+t1.8]=TRiP.GL00063}attP2	800.5	553.5	-30.2066	0.723354	35	23.6549	228.5	572	70.833
Analyzed	CG7627	CG7627	32337	y[1] sc[*] v[1]; P{y[+t7.7] v[+t1.8]=TRiP.HMS00328}attP2	997.959	841.429	-14.1698	1.22108	34.1429	31.1497	391.633	606.327	16.375
Analyzed	CG7785	CG7785	57715	y[1] sc[*] v[1]; P{y[+t7.7] v[+t1.8]=TRiP.HMC04904}attP40	925.556	742.222	-17.3432	1.1315	38.7778	24.9005	300	625.556	81.833
Analyzed	CG7841	CG7841	28752	y[1] v[1]; P{y[+t7.7] v[+t1.8]=TRiP.JF03180}attP2	962.308	794.231	-17.3333	0.934789	39.3077	25.7475	322.308	640	72.708
Analyzed	CG7879	CG7879	57816	y[1] v[1]; P{y[+t7.7] v[+t1.8]=TRiP.HMJ21824}attP40	712.632	557.895	-19.2978	0.885025	38.2105	19.8219	226.053	486.579	52.25
Analyzed	CG8006	CG8006	62281	y[1] v[1]; P{y[+t7.7] v[+t1.8]=TRiP.HMJ23638}attP40/CyO	799.75	749.75	-3.75864	1.0773	37.65	22.3353	199.5	600.25	55.667
Analyzed	CG8086	CG8086	63538	y[1] v[1]; P{y[+t7.7] v[+t1.8]=TRiP.HMJ30104}attP40/CyO	1004.67	748.667	-24.4342	0.864509	29.8	36.2151	345	659.667	91.25
Analyzed	CG8177	CG8177	51827	y[1] v[1]; P{y[+t7.7] v[+t1.8]=TRiP.HMC03399}attP40	797.593	594.444	-24.2559	0.763949	30.5185	27.3188	193.519	604.074	69.917
Analyzed	CG8195	CG8195	44447	y[1] v[1]; P{y[+t7.7] v[+t1.8]=TRiP.GLC01596}attP2	972.941	702.941	-27.506	0.99968	29.5882	33.5932	318.824	654.118	90.333
Analyzed	CG8204	CG8204	41601	y[1] v[1]; P{y[+t7.7] v[+t1.8]=TRiP.GL01141}attP2	900.833	562.778	-35.5603	0.962447	35.7778	26.3802	305.833	595	55.417
Analyzed	CG8492	CG8492	61928	y[1] v[1]; P{y[+t7.7] v[+t1.8]=TRiP.HMJ23511}attP40	882.632	697.368	-20.2889	0.699819	35.7895	25.9792	260.526	622.105	81.25
Analyzed	CG8908	CG8908	41850	y[1] v[1]; P{y[+t7.7] v[+t1.8]=TRiP.GL01278}attP2/TM3, Sb[1]	985	635.909	-34.6167	1.19382	29.7273	34.2224	335.909	649.091	77.5
Analyzed	CG9005	CG9005	27076	y[1] sc[*] v[1]; P{y[+t7.7] v[+t1.8]=TRiP.HMS00234}attP2	977.083	882.292	-9.40243	1.19091	37.3333	28.5677	369.167	607.917	20.0417
Analyzed	CG9095	CG9095	61881	y[1] v[1]; P{y[+t7.7] v[+t1.8]=TRiP.HMJ23371}attP40	1113.5	768	-30.4032	1.25222	26.4	47.5308	446	667.5	38.8333
Analyzed	CG9215	CG9215	57537	y[1] sc[*] v[1]; P{y[+t7.7] v[+t1.8]=TRiP.HMC04853}attP40	1083.79	716.379	-32.6867	1.21837	32.7931	35.842	428.448	655.345	101.333
Analyzed	CG9220	CG9220	51787	y[1] v[1]; P{y[+t7.7] v[+t1.8]=TRiP.HMC03343}attP40	901.957	821.087	-7.82851	0.941511	29.7826	31.2954	259.565	642.391	79.667
Analyzed	CG9377	CG9377	55623	y[1] sc[*] v[1]; P{y[+t7.7] v[+t1.8]=TRiP.HMC03767}attP40	525.789	398.421	-23.6305	1.04657	33.0526	16.0114	199.211	326.579	52
Analyzed	CG9384	CG9384	57800	y[1] v[1]; P{y[+t7.7] v[+t1.8]=TRiP.HMJ21796}attP40	890	738.182	-16.597	0.934954	40.5455	23.8129	313.182	576.818	81
Analyzed	CG9413	CG9413	51791	y[1] sc[*] v[1]; P{y[+t7.7] v[+t1.8]=TRiP.HMC03347}attP2	946.739	744.783	-20.3107	1.1496	30.3913	33.2778	278.043	668.696	89.667
Analyzed	CG9425	CG9425	34099	y[1] sc[*] v[1]; P{y[+t7.7] v[+t1.8]=TRiP.HMS01002}attP2	822.5	742	-6.00948	1.41808	45.4	20.0664	312.5	510	71.417
Analyzed	CG9634	CG9634	41853	y[1] v[1]; P{y[+t7.7] v[+t1.8]=TRiP.GL01281}attP2	713.75	641.25	-2.4616	1.17574	37.875	19.467	195.625	518.125	65.792
Analyzed	CG9663	CG9663	62192	y[1] sc[*] v[1]; P{y[+t7.7] v[+t1.8]=TRiP.HMC05199}attP40	815	827.5	3.58326	1.81695	30.8333	26.6617	248.333	566.667	75
Analyzed	CG9674	CG9674	57483	y[1] sc[*] v[1]; P{y[+t7.7] v[+t1.8]=TRiP.HMC04796}attP40	1360.56	1179.44	-13.0049	0.762964	10.2222	191.599	692.222	668.333	1.1667
Analyzed	CG9961	CG9961	33959	y[1] sc[*] v[1]; P{y[+t7.7] v[+t1.8]=TRiP.HMS00916}attP2/TM3, Sb[1]	855.556	577.778	-29.0995	2.23442	37.7778	25.6968	345.556	510	31.5
Analyzed	CG9012	Chc	34742	y[1] sc[*] v[1]; P{y[+t7.7] v[+t1.8]=TRiP.HMS01222}attP2	798.125	581.25	-21.8239	1.32346	37.8125	22.4756	232.188	565.938	95.917
Analyzed	CG3937	cher	35755	y[1] sc[*] v[1]; P{y[+t7.7] v[+t1.8]=TRiP.HMS01501}attP2/TM3, Sb[1]	781.429	968.571	31.0917	1.67035	39.8571	20.5053	273.571	507.857	98.417
Analyzed	CG12690	CHES-1-like	26760	y[1] v[1]; P{y[+t7.7] v[+t1.8]=TRiP.JF02324}attP2	992.5	693.75	-28.9359	1.14233	28.25	36.6309	326.25	666.25	61.208
Analyzed	CG31666	chinmo	26777	y[1] v[1]; P{y[+t7.7] v[+t1.8]=TRiP.JF02341}attP2	848.5	731.25	-12.2843	1.2216	36.05	24.5581	264.25	584.25	78.708
Analyzed	CG7392	Cka	31642	y[1] v[1]; P{y[+t7.7] v[+t1.8]=TRiP.JF01432}attP2	655.625	513.125	-21.3358	1.2432	7.25	153.943			64.958
Analyzed	CG5020	CLIP-190	31265	y[1] v[1]; P{y[+t7.7] v[+t1.8]=TRiP.JF01206}attP2	941.667	599.444	-35.2107	0.963214	39.2222	26.1434	379.444	562.222	56
Analyzed	CG7391	Clk	31660	y[1] v[1]; P{y[+t7.7] v[+t1.8]=TRiP.JF01453}attP2	972.5	717.5	-28.5804	0.80435	30.5	35.4371	370	602.5	76.667
Analyzed	CG43286	cnc	25984	y[1] v[1]; P{y[+t7.7] v[+t1.8]=TRiP.JF02006}attP2	878.75	797.812	-5.32032	0.832528	43.875	20.9	321.562	557.188	54.125
Analyzed	CG17943	comm	28381	y[1] v[1]; P{y[+t7.7] v[+t1.8]=TRiP.JF03018}attP2/TM3, Sb[1]	902.045	684.318	-21.2266	1.00189	35.8636	27.5882	335	567.045	82.042
Analyzed	CG42334	comm3	63005	y[1] v[1]; P{y[+t7.7] v[+t1.8]=TRiP.HMJ30082}attP40/CyO	804.375	571.875	-27.8948	0.792875	27.625	31.471	188.125	616.25	88.292
Analyzed	CG7503	Con	28967	y[1] v[1]; P{y[+t7.7] v[+t1.8]=TRiP.HM05178}attP2	871.757	653.919	-23.6344	0.799847	37.8649	24.6733	296.622	575.135	43.3333
Analyzed	CG3637	Cortactin	32871	y[1] sc[*] v[1]; P{y[+t7.7] v[+t1.8]=TRiP.HMS00658}attP2	843.889	746.111	-10.4553	1.05758	34	26.2086	235.556	608.333	76.542
Analyzed	CG43738	cpo	28360	y[1] v[1]; P{y[+t7.7] v[+t1.8]=TRiP.JF02996}attP2	986.25	895.417	-8.29292	0.922796	41.1667	24.8021	384.583	601.667	50.1667
Analyzed	CG14431	CR14431	62538	y[1] v[1]; P{y[+t7.7] v[+t1.8]=TRiP.HMJ24082}attP40/CyO	865.5	738	-13.2134	0.891764	33.2	27.165	250	615.5	98.75
Analyzed	CG6064	Crtc	28886	y[1] v[1]; P{y[+t7.7] v[+t1.8]=TRiP.HM05069}attP2	890.556	880.556	0.601786	0.756955	34.8889	26.5753	279.444	611.111	74.667
Analyzed	CG10698	CrzR	26017	y[1] v[1]; P{y[+t7.7] v[+t1.8]=TRiP.JF02042}attP2	822.222	735	-9.37545	1.25696	35.7778	23.5152	270	552.222	71.5
Analyzed	CG3954	csw	31760	y[1] v[1]; P{y[+t7.7] v[+t1.8]=TRiP.HM04072}attP2	822.381	668.333	-18.8469	0.838521	32	26.4751	214.286	608.095	53.583
Analyzed	CG12086	cue	36875	y[1] sc[*] v[1]; P{y[+t7.7] v[+t1.8]=TRiP.GL01033}attP2	860.526	691.579	-19.3206	1.01134	32.5263	27.4837	244.737	615.789	67.333
Analyzed	CG3656	Cyp4d1	52979	y[1] v[1]; P{y[+t7.7] v[+t1.8]=TRiP.HMJ21666}attP40	886.75	634.625	-27.2519	0.924158	33.325	27.6051	259.5	627.25	74.167
Analyzed	CG42840	d	27664	y[1] v[1]; P{y[+t7.7] v[+t1.8]=TRiP.JF02743}attP2	916.875	698.125	-18.3047	0.999742	34	28.0979	283.125	633.75	74.792
Analyzed	CG5201	Dad	26235	y[1] v[1]; P{y[+t7.7] v[+t1.8]=TRiP.JF02133}attP2	768.75	686.875	-4.43743	1.1397	38.75	20.3547	273.75	495	88.083
Analyzed	CG3318	Dat	26243	y[1] v[1]; P{y[+t7.7] v[+t1.8]=TRiP.JF02142}attP2	930	517.5	-42.0098	0.62865	44.3	25.0661	357.5	572.5	27.0833
Analyzed	CG6224	dbo	38221	y[1] v[1]; P{y[+t7.7] v[+t1.8]=TRiP.GL00662}attP40	876.429	684.643	-20.4844	0.843708	36.1429	25.8118	290.714	585.714	38.5833
Analyzed	CG17023	Dbp80	34682	y[1] sc[*] v[1]; P{y[+t7.7] v[+t1.8]=TRiP.HMS01160}attP2	736.25	673.438	-4.70451	1.42968	42.375	18.35	220.625	515.625	72.375
Analyzed	CG18250	Dg	34895	y[1] sc[*] v[1]; P{y[+t7.7] v[+t1.8]=TRiP.HMS01240}attP2	972.5	657.083	-31.8614	1.19012	27.5833	38.7673	340	632.5	95.833
Analyzed	CG34361	Dgk	29459	y[1] v[1]; P{y[+t7.7] v[+t1.8]=TRiP.JF03396}attP2	1330	1430	7.92948	0.857821	11	149.125	616.667	713.333	29
Analyzed	CG13094	Dh31	41957	y[1] sc[*] v[1]; P{y[+t7.7] v[+t1.8]=TRiP.HMS02354}attP2/TM3, Sb[1]	1032.67	810.667	-17.0671	1.54033	33.8	51.0276	414.667	618	44.75
Analyzed	CG32843	Dh31-R	25925	y[1] v[1]; P{y[+t7.7] v[+t1.8]=TRiP.JF01945}attP2/TM3, Sb[1]	899	795.25	-11.2315	1.01808	27.05	34.3915	234	665	78
Analyzed	CG8422	Dh44-R1	28780	y[1] v[1]; P{y[+t7.7] v[+t1.8]=TRiP.JF03208}attP2	877.115	759.231	-12.5787	0.961384	33.8846	27.6299	264.423	612.692	77.917
Analyzed	CG5526	Dhc36C	51726	y[1] sc[*] v[1]; P{y[+t7.7] v[+t1.8]=TRiP.HMC03270}attP2/TM3, Sb[1] Ser[1]	1027.14	676.071	-32.7863	1.02712	31.0714	35.9224	358.571	668.571	88.25
Analyzed	CG3723	Dhc93AB	51511	y[1] v[1]; P{y[+t7.7] v[+t1.8]=TRiP.HMC03281}attP2	871.25	637.5	-26.3149	0.90362	38	24.107	281.25	590	82.875
Analyzed	CG12284	Diap1	33597	y[1] sc[*] v[1]; P{y[+t7.7] v[+t1.8]=TRiP.HMS00752}attP2	852.727	767.727	-8.07575	1.81497	37.7273	23.1079	257.273	595.455	61.667
Analyzed	CG6794	Dif	29514	y[1] v[1]; P{y[+t7.7] v[+t1.8]=TRiP.HM05191}attP2	990	671.25	-31.0308	0.877014	33.9375	30.4895	361.875	628.125	63.5
Analyzed	CG6667	dl	27650	y[1] v[1]; P{y[+t7.7] v[+t1.8]=TRiP.JF02825}attP2	1036	954	-8.07976	0.746069	33.3	32.1893	384.5	651.5	76.458
Analyzed	CG32146	dlp	34089	y[1] sc[*] v[1]; P{y[+t7.7] v[+t1.8]=TRiP.HMS00875}attP2	1016.92	905.769	-4.8361	0.980931	33.1538	43.7719	415.769	601.154	80.667
Analyzed	CG5187	Doc2	44087	y[1] sc[*] v[1]; P{y[+t7.7] v[+t1.8]=TRiP.HMS02804}attP2	1137.33	794.333	-29.7453	0.82549	25.2	48.3099	453	684.333	71.083
Analyzed	CG5093	Doc3	31932	y[1] v[1]; P{y[+t7.7] v[+t1.8]=TRiP.JF02223}attP2	770	200	-74.026	0.783582	56	13.75	270	500	29.7917
Analyzed	CG33517	Dop2R	26001	y[1] v[1]; P{y[+t7.7] v[+t1.8]=TRiP.JF02025}attP2	938.75	725.208	-21.523	0.877958	34.6667	29.2315	310.417	628.333	52.792
Analyzed	CG5170	Dp1	32872	y[1] sc[*] v[1]; P{y[+t7.7] v[+t1.8]=TRiP.HMS00659}attP2	862.5	596.562	-28.5833	1.06557	33.75	26.2685	246.875	615.625	44.7917
Analyzed	CG32057	dpr10	27991	y[1] v[1]; P{y[+t7.7] v[+t1.8]=TRiP.JF02920}attP2	862.273	690.455	-18.768	0.720222	39.9091	23.2969	250	612.273	52.75
Analyzed	CG32600	dpr8	28744	y[1] v[1]; P{y[+t7.7] v[+t1.8]=TRiP.JF03172}attP2	912	725.75	-19.6567	0.948723	33.9	38.7314	296.25	615.75	72.25
Analyzed	CG33485	dpr9	33409	y[1] sc[*] v[1]; P{y[+t7.7] v[+t1.8]=TRiP.HMS00288}attP2	849.167	542.778	-35.0183	1.18671	39.5556	22.0981	483.889	573.333	65.875
Analyzed	CG17348	drl	29602	y[1] v[1]; P{y[+t7.7] v[+t1.8]=TRiP.JF03281}attP2	950.952	558.571	-39.701	1.01843	35	30.521	340.714	610.238	65.917
Analyzed	CG3915	Drl-2	25961	y[1] v[1]; P{y[+t7.7] v[+t1.8]=TRiP.JF01981}attP2	876.667	471.667	-47.4667	0.69854	36.3333	25.7633	270.833	605.833	42.4583
Analyzed	CG10016	drm	42548	y[1] v[1]; P{y[+t7.7] v[+t1.8]=TRiP.HMJ02120}attP40	985.714	763.571	-22.1704	1.59886	31.4286	32.5069	351.786	633.929	49
Analyzed	CG3365	drongo	60891	y[1] v[1]; P{y[+t7.7] v[+t1.8]=TRiP.HMJ22758}attP40	1137.08	1033.47	-8.37278	0.812004	29.9722	40.9473	465	672.083	65.958
Analyzed	CG3210	Drp1	27682	y[1] v[1]; P{y[+t7.7] v[+t1.8]=TRiP.JF02762}attP2	930	769.062	-14.294	1.18465	36.25	27.8734	321.25	608.75	72.458
Analyzed	CG42330	Dscam4	51508	y[1] sc[*] v[1]; P{y[+t7.7] v[+t1.8]=TRiP.HMC03277}attP2	615	449.444	-24.3581	0.90733	28.5556	21.8837	110	505	64.75
Analyzed	CG34157	Dys	55641	y[1] sc[*] v[1]; P{y[+t7.7] v[+t1.8]=TRiP.HMC03789}attP40	853.75	798.75	-5.96369	0.975742	40.05	22.684	291.5	562.25	58.583
Analyzed	CG3327	E23	26252	y[1] v[1]; P{y[+t7.7] v[+t1.8]=TRiP.JF02151}attP2	919.091	665	-26.0594	0.938241	42.4545	22.8239	370.909	548.182	68.792
Analyzed	CG3159	Eaat2	40832	y[1] v[1]; P{y[+t7.7] v[+t1.8]=TRiP.HMS01998}attP40/CyO	1032.32	789.643	-22.6221	1.04724	31.8571	37.8226	384.643	647.679	99.917
Analyzed	CG12676	ed	38209	y[1] sc[*] v[1]; P{y[+t7.7] v[+t1.8]=TRiP.HMS01687}attP40	773.971	863.676	20.6684	0.869845	48.9412	16.9295	297.206	476.765	100.167
Analyzed	CG15085	edl	57552	y[1] sc[*] v[1]; P{y[+t7.7] v[+t1.8]=TRiP.HMC04869}attP40	887.273	834.545	-3.90596	1.78494	40.2727	22.9936	284.545	602.727	104.583
Analyzed	CG6542	EDTP	41633	y[1] v[1]; P{y[+t7.7] v[+t1.8]=TRiP.GL01215}attP40	967.812	872.188	-9.72387	1.07833	40	24.9558	330.625	637.188	89.292
Analyzed	CG9659	egh	28687	y[1] v[1]; P{y[+t7.7] v[+t1.8]=TRiP.JF03102}attP2	904.375	592.812	-32.3786	0.896528	41.5625	22.7207	330	574.375	72.75
Analyzed	CG7599	Eig71Ef	55930	y[1] sc[*] v[1]; P{y[+t7.7] v[+t1.8]=TRiP.HMC04218}attP40	840.667	478.333	-43.8658	1.60741	32.2	29.1626	233.333	607.333	27.9167
Analyzed	CG7336	Eig71Eg	56953	y[1] sc[*] v[1]; P{y[+t7.7] v[+t1.8]=TRiP.HMC04393}attP40	856.935	782.097	-8.45948	0.906314	36.1613	32.0397	235.161	621.774	102.417
Analyzed	CG5345	Eip55E	41876	y[1] sc[*] v[1]; P{y[+t7.7] v[+t1.8]=TRiP.GL01308}attP40	895	723.214	-11.9417	1.24741	35.5714	28.1972	306.786	588.214	77.417
Analyzed	CG32180	Eip74EF	29353	y[1] v[1]; P{y[+t7.7] v[+t1.8]=TRiP.JF02515}attP2	910.625	590.938	-34.7302	1.24183	39.5	25.7102	306.562	604.062	49.25
Analyzed	CG8127	Eip75B	35780	y[1] sc[*] v[1]; P{y[+t7.7] v[+t1.8]=TRiP.HMS01530}attP40	850	759.375	-9.89658	1.23052	37	23.7618	232.812	617.188	88.667
Analyzed	CG6382	Elf	36703	y[1] sc[*] v[1]; P{y[+t7.7] v[+t1.8]=TRiP.HMS01592}attP2	884.5	689.5	-20.9035	0.99792	30	30.084	263	621.5	98.542
Analyzed	CG5076	Elk	25821	y[1] v[1]; P{y[+t7.7] v[+t1.8]=TRiP.JF01839}attP2	769.412	664.412	-10.652	1.66566	37.7059	21.7755	200.294	569.118	31.4167
Analyzed	CG10847	enc	42797	y[1] v[1]; P{y[+t7.7] v[+t1.8]=TRiP.GL01168}attP2	959.792	666.25	-29.7485	0.893727	29.1667	35.3809	314.792	645	80.75
Analyzed	CG10215	Ercc1	62971	y[1] v[1]; P{y[+t7.7] v[+t1.8]=TRiP.HMJ30048}attP40	751.333	565	-23.5384	0.775315	33.4667	23.6705	191	560.333	47.9167
Analyzed	CG6822	ergic53	55657	y[1] sc[*] v[1]; P{y[+t7.7] v[+t1.8]=TRiP.HMC03809}attP40	948.889	716.111	-22.7076	0.632805	32.3333	32.8467	288.889	660	60
Analyzed	CG31670	erm	26778	y[1] v[1]; P{y[+t7.7] v[+t1.8]=TRiP.JF02342}attP2	841.562	545.938	-33.5149	1.11006	34.9375	26.2501	238.75	592.188	65.75
Analyzed	CG33955	eys	31513	y[1] v[1]; P{y[+t7.7] v[+t1.8]=TRiP.JF01069}attP2	956	817.6	-13.6705	0.969397	32.4	30.3613	304.6	651.4	88.25
Analyzed	CG6588	Fas1	41854	y[1] v[1]; P{y[+t7.7] v[+t1.8]=TRiP.GL01282}attP2/TM3, Sb[1]	897.778	868.333	-1.56529	1.57936	34.6667	26.2211	296.111	601.667	53.583
Analyzed	CG8200	Flo1	36649	y[1] sc[*] v[1]; P{y[+t7.7] v[+t1.8]=TRiP.GL00609}attP40	908.667	708	-22.4962	0.760402	34.6	26.7381	277.667	631	96.5
Analyzed	CG2114	FMRFaR	25858	y[1] v[1]; P{y[+t7.7] v[+t1.8]=TRiP.JF01879}attP2	957.647	748.235	-20.2464	0.858323	39.0588	26.4276	350.588	607.059	44.5833
Analyzed	CG8649	Fim	32936	y[1] sc[*] v[1]; P{y[+t7.7] v[+t1.8]=TRiP.HMS00729}attP2	781.538	629.231	-17.6745	0.948537	44.0769	17.9716	256.154	525.385	63.917
Analyzed	CG7526	frac	31577	y[1] v[1]; P{y[+t7.7] v[+t1.8]=TRiP.JF01150}attP2	958.182	824.091	-12.9101	1.11441	40.5455	24.6147	325	633.182	54.917
Analyzed	CG4396	fne	53340	y[1] sc[*] v[1]; P{y[+t7.7] v[+t1.8]=TRiP.HMC03569}attP40	773.889	580.556	-23.9886	1.47733	41.4444	19.031	274.444	499.444	61.833
Analyzed	CG31774	fred	42621	y[1] sc[*] v[1]; P{y[+t7.7] v[+t1.8]=TRiP.HMS02456}attP2	1034.58	1153.33	12.6986	1.75993	30.6667	42.259	463.75	570.833	28.25
Analyzed	CG32045	fry	60103	y[1] sc[*] v[1]; P{y[+t7.7] v[+t1.8]=TRiP.HMC05097}attP40	730.217	368.261	-48.0696	1.24527	39.5652	19.3399	231.304	498.913	53.958
Analyzed	CG33466	Fs	63009	y[1] v[1]; P{y[+t7.7] v[+t1.8]=TRiP.HMJ30086}attP40	1070	886.875	-17.0933	1.68903	40	27.9695	445	625	96.083
Analyzed	CG11411	fs(1)N	56968	y[1] sc[*] v[1]; P{y[+t7.7] v[+t1.8]=TRiP.HMC04409}attP40/CyO	822.25	715.25	-9.08727	0.952002	40.05	22.3976	275.25	547	108.5
Analyzed	CG3352	ft	29566	y[1] v[1]; P{y[+t7.7] v[+t1.8]=TRiP.JF03245}attP2	848.75	438.75	-48.5466	0.793608	40.25	22.372	281.25	567.5	0
Analyzed	CG34387	futsch	40834	y[1] v[1]; P{y[+t7.7] v[+t1.8]=TRiP.HMS02000}attP40	1075.76	653.788	-38.4943	1.37245	34.6364	39.9587	465.909	609.848	47.5
Analyzed	CG8205	fus	55921	y[1] sc[*] v[1]; P{y[+t7.7] v[+t1.8]=TRiP.HMC04208}attP40	728.333	593.333	-16.6722	1.0015	35.3333	20.6124	216.667	511.667	0
Analyzed	CG17697	fz	31036	y[1] v[1]; P{y[+t7.7] v[+t1.8]=TRiP.JF01481}attP2	852.778	687.778	-18.2851	0.945506	36.4444	24.5234	243.889	608.889	57
Analyzed	CG9739	fz2	27568	y[1] v[1]; P{y[+t7.7] v[+t1.8]=TRiP.JF02722}attP2	951.818	715	-23.5984	1.67126	31.5	33.2064	345.909	605.909	15.2917
Analyzed	CG15274	GABA-B-R1	28353	y[1] v[1]; P{y[+t7.7] v[+t1.8]=TRiP.JF02989}attP2/TM3, Sb[1]	1059	779.5	-24.5112	1.36681	34.7	44.4657	412	647	66.033
Analyzed	CG3022	GABA-B-R3	26729	y[1] v[1]; P{y[+t7.7] v[+t1.8]=TRiP.JF02271}attP2	850.357	506.071	-39.5709	0.994926	36.1429	24.1392	249.286	614.286	42.4167
Analyzed	CG13927	GC	51897	y[1] v[1]; P{y[+t7.7] v[+t1.8]=TRiP.HMC03471}attP40	917.727	763.182	-15.8641	0.715331	34.2727	27.5513	270.455	647.273	101.917
Analyzed	CG5320	Gdh	51473	y[1] v[1]; P{y[+t7.7] v[+t1.8]=TRiP.HMC03217}attP40	885.577	647.308	-27.6287	1.41638	33.1154	27.7788	250.385	635.192	69.75
Analyzed	CG30115	GEFmeso	42545	y[1] v[1]; P{y[+t7.7] v[+t1.8]=TRiP.HMJ02116}attP40	850	874.062	4.88809	1.0054	36.4375	24.1995	246.25	603.75	81.5
Analyzed	CG43224	Gfrl	51505	y[1] sc[*] v[1]; P{y[+t7.7] v[+t1.8]=TRiP.HMC03267}attP2	945.556	490.556	-45.3547	0.691887	29	35.3812	311.111	634.444	69.5
Analyzed	CG3002	Gga	51170	y[1] v[1]; P{y[+t7.7] v[+t1.8]=TRiP.HMJ21093}attP40	1001.76	649.706	-34.9917	0.87936	33	32.5126	357.059	644.706	78.833
Analyzed	CG7234	GluRIIB	28718	y[1] v[1]; P{y[+t7.7] v[+t1.8]=TRiP.JF03145}attP2	859.737	767.105	-8.7536	0.995485	34.2632	26.4399	243.947	615.789	59.5
Analyzed	CG4226	GluRIIC	25836	y[1] v[1]; P{y[+t7.7] v[+t1.8]=TRiP.JF01854}attP2	886.515	680.152	-22.9766	0.953173	36.3333	25.3757	270.909	615.606	84.875
Analyzed	CG43946	Glut1	28645	y[1] v[1]; P{y[+t7.7] v[+t1.8]=TRiP.JF03060}attP2	945.909	775.909	-17.3739	1.0877	38.7273	25.7864	334.545	611.364	48.25
Analyzed	CG34360	Glut4EF	57461	y[1] sc[*] v[1]; P{y[+t7.7] v[+t1.8]=TRiP.HMC04771}attP40	890.417	832.5	-6.10568	1.54629	35.75	26.2575	274.583	615.833	68.833
Analyzed	CG5008	GNBP3	61819	y[1] v[1]; P{y[+t7.7] v[+t1.8]=TRiP.HMJ23262}attP40	830	422	-48.1744	1.27037	30.5	29.0463	235	595	55.833
Analyzed	CG5272	gnu	51703	y[1] v[1]; P{y[+t7.7] v[+t1.8]=TRiP.HMC03185}attP40	854	675	-20.742	1.10159	35.9	24.9645	248.5	605.5	74.417
Analyzed	CG5091	gny	51865	y[1] sc[*] v[1]; P{y[+t7.7] v[+t1.8]=TRiP.HMC03439}attP40	951.667	669	-29.2882	0.965796	25.8	37.8708	399.667	552	79.917
Analyzed	CG8430	Got1	43194	y[1] v[1]; P{y[+t7.7] v[+t1.8]=TRiP.GL01538}attP40	953.333	784.333	-14.8789	0.935077	36.2	33.7422	332	621.333	58.5
Analyzed	CG7189	Gr66a	31284	y[1] v[1]; P{y[+t7.7] v[+t1.8]=TRiP.JF01225}attP2	922.667	614.667	-31.8816	0.691952	37.4667	26.5241	303	619.667	43.6667
Analyzed	CG7446	Grd	58175	y[1] v[1]; P{y[+t7.7] v[+t1.8]=TRiP.HMJ22152}attP40	820.357	666.429	-16.5937	0.656414	28.2143	31.4633	214.643	605.714	74.792
Analyzed	CG14447	Grip	28334	y[1] v[1]; P{y[+t7.7] v[+t1.8]=TRiP.JF02969}attP2	900	770.625	-15.5441	2.08644	35.75	26.2112	341.875	558.125	42.7917
Analyzed	CG4688	GstE14	54836	y[1] v[1]; P{y[+t7.7] v[+t1.8]=TRiP.HMJ21555}attP40	960	610	-34.575	0.84068	34	30.837	344.333	615.667	58.917
Analyzed	CG17533	GstE8	62994	y[1] v[1]; P{y[+t7.7] v[+t1.8]=TRiP.HMJ30071}attP40	1008.89	758.889	-23.9786	0.619333	30	37.4373	328.333	680.556	79.833
Analyzed	CG6776	GstO3	35762	y[1] sc[*] v[1]; P{y[+t7.7] v[+t1.8]=TRiP.HMS01510}attP40	870.833	721.25	-16.8313	0.784068	30.5833	29.6003	218.333	652.5	64.75
Analyzed	CG4154	Gyc88E	28608	y[1] v[1]; P{y[+t7.7] v[+t1.8]=TRiP.HM05096}attP2	917.857	781.429	-14.2856	0.914958	35.4286	26.5965	307.857	610	60.167
Analyzed	CG1470	Gycbeta100B	28786	y[1] v[1]; P{y[+t7.7] v[+t1.8]=TRiP.JF03214}attP2	877.917	800	-7.39517	1.07795	40.4167	22.4288	361.667	516.25	52.833
Analyzed	CG6494	h	27738	y[1] v[1]; P{y[+t7.7] v[+t1.8]=TRiP.JF02822}attP2	997.895	676.579	-31.8219	1.25704	30.7895	39.0657	342.368	655.526	50.375
Analyzed	CG31753	ham	26728	y[1] v[1]; P{y[+t7.7] v[+t1.8]=TRiP.JF02270}attP2	1056.54	528.462	-49.6499	1.58317	32.4615	34.4155	435.769	620.769	8.5417
Analyzed	CG4395	hec	29623	y[1] v[1]; P{y[+t7.7] v[+t1.8]=TRiP.JF03302}attP2	999.242	713.182	-27.775	0.920142	37.303	27.8858	354.545	644.697	111.667
Analyzed	CG7056	HHEX	60119	y[1] sc[*] v[1]; P{y[+t7.7] v[+t1.8]=TRiP.HMC05113}attP40	869.375	733.125	-14.8216	0.73552	37.625	23.4273	295.625	573.75	103.833
Analyzed	CG17090	hipk	35363	y[1] sc[*] v[1]; P{y[+t7.7] v[+t1.8]=TRiP.GL00276}attP2	853.846	572.5	-31.3214	0.912271	36.5769	24.7589	245.962	607.885	76.083
Analyzed	CG7399	Hn	29540	y[1] v[1]; P{y[+t7.7] v[+t1.8]=TRiP.JF02261}attP2	768.75	699.375	-5.3751	1.07839	39.9375	20.0049	214.688	554.062	66.125
Analyzed	CG7097	hppy	35284	y[1] sc[*] v[1]; P{y[+t7.7] v[+t1.8]=TRiP.GL00185}attP2	843.75	795	-3.47279	1.19638	34.1667	26.9411	249.167	594.583	88.75
Analyzed	CG9983	Hrb98DE	31303	y[1] v[1]; P{y[+t7.7] v[+t1.8]=TRiP.JF01249}attP2	985.294	1165.88	22.1957	0.965722	28.7647	73.6545	350	635.294	12.9583
Analyzed	CG33147	Hs3st-A	28618	y[1] v[1]; P{y[+t7.7] v[+t1.8]=TRiP.JF03033}attP2	953.438	680.938	-27.462	0.986704	37.0625	27.855	330.312	623.125	76.25
Analyzed	CG9995	htt	31264	y[1] v[1]; P{y[+t7.7] v[+t1.8]=TRiP.JF01205}attP2	1037.19	748.125	-27.573	0.86855	33.8125	49.2819	371.562	665.625	73.208
Analyzed	CG31795	IA-2	44099	y[1] v[1]; P{y[+t7.7] v[+t1.8]=TRiP.HMS02819}attP40	849	485	61.4651	1.14573	30.4	28.4266	290.5	558.5	51.9167
Analyzed	CG7176	Idh	41708	y[1] v[1]; P{y[+t7.7] v[+t1.8]=TRiP.HMS02273}attP40	934.062	756.875	-18.2155	0.937963	30.4375	35.5429	315.625	618.438	83.917
Analyzed	CG18285	igl	29598	y[1] v[1]; P{y[+t7.7] v[+t1.8]=TRiP.JF03277}attP2	1085.62	706.25	-34.2899	1.4743	27	45.0709	416.875	668.75	31.125
Analyzed	CG14049	Ilp6	31379	y[1] v[1]; P{y[+t7.7] v[+t1.8]=TRiP.JF01348}attP2	665	449.062	-32.4033	1.19297	5.9375	151.945	221.667	443.333	50.9167
Analyzed	CG32810	inc	25889	y[1] v[1]; P{y[+t7.7] v[+t1.8]=TRiP.JF01930}attP2	945.625	551.875	-39.7292	1.48398	35.25	28.7626	340.625	605	33.5833
Analyzed	CG33933	Indy-2	34891	y[1] sc[*] v[1]; P{y[+t7.7] v[+t1.8]=TRiP.HMS01236}attP2	974.091	818.182	-15.7266	0.930925	30.4545	33.4875	302.727	671.364	57.333
Analyzed	CG6718	iPLA2-VIA	36129	y[1] sc[*] v[1]; P{y[+t7.7] v[+t1.8]=TRiP.HMS01544}attP2	835.484	637.903	-24.7122	0.826237	38.0323	22.6127	267.258	568.226	39.0833
Analyzed	CG6185	Ir68a	60108	y[1] sc[*] v[1]; P{y[+t7.7] v[+t1.8]=TRiP.HMC05102}attP40	838.636	687.727	-17.0359	1.00829	32.9091	27.5334	216.818	621.818	92.25
Analyzed	CG4370	Irk2	41981	y[1] sc[*] v[1]; P{y[+t7.7] v[+t1.8]=TRiP.HMS02379}attP2	726.111	513.333	-29.9671	1.0416	38.7778	20.0047	206.111	520	54.417
Analyzed	CG5695	jar	28064	y[1] v[1]; P{y[+t7.7] v[+t1.8]=TRiP.JF02901}attP2	760	700	-7.89474	0.711765	41	18.5366	300	460	40.9167
Analyzed	CG6297	JIL-1	42571	y[1] v[1]; P{y[+t7.7] v[+t1.8]=TRiP.HMJ02230}attP40	885	619.231	-27.3967	1.17527	33.9231	28.3278	263.846	621.154	52.75
Analyzed	CG32397	jv	61877	y[1] v[1]; P{y[+t7.7] v[+t1.8]=TRiP.HMJ23366}attP40	870.455	825.909	-3.78419	0.841786	41.8182	21.9079	282.273	588.182	59.667
Analyzed	CG6173	Kal1	55981	y[1] sc[*] v[1]; P{y[+t7.7] v[+t1.8]=TRiP.HMC04277}attP40	960.385	636.923	-31.7624	0.710576	34	30.5009	337.692	622.692	72.417
Analyzed	CG12199	kek5	40830	y[1] v[1]; P{y[+t7.7] v[+t1.8]=TRiP.HMS01996}attP40	886	747	-13.1391	0.952787	34.0667	27.4713	273.667	612.333	67.167
Analyzed	CG33182	Kdm4B	35676	y[1] sc[*] v[1]; P{y[+t7.7] v[+t1.8]=TRiP.GLV21041}attP2	972.703	732.432	-24.5278	1.16798	27.6486	36.5911	386.486	586.216	83
Analyzed	CG7210	kel	31251	y[1] v[1]; P{y[+t7.7] v[+t1.8]=TRiP.JF01768}attP2	860.667	556	-33.8282	0.773315	40.7333	21.5592	305	555.667	51.5
Analyzed	CG8183	Khc-73	36733	y[1] sc[*] v[1]; P{y[+t7.7] v[+t1.8]=TRiP.HMS01624}attP40	682.5	790.625	22.0188	1.02367	58.875	11.6421	278.75	403.75	59.083
Analyzed	CG3696	kis	34908	y[1] sc[*] v[1]; P{y[+t7.7] v[+t1.8]=TRiP.HMS01254}attP2	869.583	585	-31.8115	0.8216	34.0833	26.9308	250	619.583	87.917
Analyzed	CG17046	klar	28313	y[1] v[1]; P{y[+t7.7] v[+t1.8]=TRiP.JF02944}attP2 e[1]	891.562	684.688	-22.8232	0.975516	42.5	22.6362	314.375	577.188	51.5417
Analyzed	CG5300	Klp31E	40943	y[1] v[1]; P{y[+t7.7] v[+t1.8]=TRiP.HMS02191}attP40	826.071	693.571	-10.263	0.854313	34	24.9637	238.214	587.857	84.958
Analyzed	CG12296	klu	28731	y[1] v[1]; P{y[+t7.7] v[+t1.8]=TRiP.JF03158}attP2	896	707.5	-20.2455	1.06762	41.3	22.3125	307	589	74.333
Analyzed	CG10197	kn	31916	y[1] v[1]; P{y[+t7.7] v[+t1.8]=TRiP.JF02206}attP2	879.25	744.25	-8.67568	1.13548	35.45	25.7867	289	590.25	83.417
Analyzed	CG15095	l(2)08717	33999	y[1] sc[*] v[1]; P{y[+t7.7] v[+t1.8]=TRiP.HMS00962}attP2	942.083	781.25	-14.54	0.835898	32.1667	29.6588	285.833	656.25	60.875
Analyzed	CG2671	l(2)gl	31517	y[1] v[1]; P{y[+t7.7] v[+t1.8]=TRiP.JF01073}attP2	882.895	698.684	-19.3343	1.29762	40.2105	23.6214	330.526	552.368	66.167
Analyzed	CG4798	l(2)k01209	35282	y[1] sc[*] v[1]; P{y[+t7.7] v[+t1.8]=TRiP.GL00183}attP2	837.333	788.5	-2.49085	1.10389	37.6333	24.4044	273	564.333	41.1667
Analyzed	CG10443	Lar	40938	y[1] v[1]; P{y[+t7.7] v[+t1.8]=TRiP.HMS02186}attP40	1093	978	-2.80414	1.04485	30.5	43.9014	465.5	627.5	76.458
Analyzed	CG3849	Lasp	26305	y[1] v[1]; P{y[+t7.7] v[+t1.8]=TRiP.JF02075}attP2	1016.56	655.625	-35.7038	0.802843	32.75	31.9331	370	646.562	52.75
Analyzed	CG6570	lbl	35698	y[1] sc[*] v[1]; P{y[+t7.7] v[+t1.8]=TRiP.GLV21063}attP2	936.944	1021.11	11.7533	1.04005	39.5556	25.5329	310.278	626.667	54.5
Analyzed	CG8585	Ih	29574	y[1] v[1]; P{y[+t7.7] v[+t1.8]=TRiP.JF03253}attP2	900	725	-18.5306	0.738677	42.5333	21.7773	301.333	598.667	49.25
Analyzed	CG8817	lilli	26314	y[1] v[1]; P{y[+t7.7] v[+t1.8]=TRiP.JF02087}attP2	896.071	784.643	-13.127	1.06927	37.1429	25.664	289.286	606.786	57.167
Analyzed	CG10699	Lim3	26227	y[1] v[1]; P{y[+t7.7] v[+t1.8]=TRiP.JF02125}attP2	874.783	558.696	-29.3188	1.01083	35.087	27.6729	318.913	555.87	81.958
Analyzed	CG1848	LIMK1	26294	y[1] v[1]; P{y[+t7.7] v[+t1.8]=TRiP.JF02063}attP2	942.188	592.812	-35.156	0.912668	37.625	26.1692	343.438	598.75	44.0417
Analyzed	CG11199	Liprin-alpha	53868	y[1] v[1]; P{y[+t7.7] v[+t1.8]=TRiP.HMC03183}attP40	871.176	960.588	16.5772	1.15804	40.1176	23.7286	320	551.176	83.167
Analyzed	CG11206	Liprin-gamma	28301	y[1] v[1]; P{y[+t7.7] v[+t1.8]=TRiP.JF02932}attP2	773.333	591.667	-23.251	0.783965	38.3333	20.4217	241.667	531.667	0
Analyzed	CG42679	Lmpt	28790	y[1] v[1]; P{y[+t7.7] v[+t1.8]=TRiP.JF03218}attP2	841.562	661.562	-21.0483	1.28201	31.5625	28.7101	232.188	609.375	42
Analyzed	CG16778	lov	31915	y[1] v[1]; P{y[+t7.7] v[+t1.8]=TRiP.JF02205}attP2	813.929	607.857	-23.5747	0.995416	41	20.4319	233.214	580.714	72.292
Analyzed	CG33087	LRP1	31151	y[1] v[1]; P{y[+t7.7] v[+t1.8]=TRiP.JF01628}attP2	1063.67	753.667	-28.4106	1.09044	36.2667	30.5118	401.333	662.333	62.5
Analyzed	CG31184	LSm3	56892	y[1] sc[*] v[1]; P{y[+t7.7] v[+t1.8]=TRiP.HMC04113}attP40	918.125	795	-12.4653	0.802499	39.75	23.4238	306.042	612.083	94.833
Analyzed	CG4178	Lsp1beta	27042	y[1] v[1]; P{y[+t7.7] v[+t1.8]=TRiP.JF02368}attP2	1016.11	704.861	-29.4788	1.6339	25.8611	45.8998	379.583	636.528	67.375
Analyzed	CG-N/A	Luciferase-RNAi	31603	y[1] v[1]; P{y[+t7.7] v[+t1.8]=TRiP.JF01355}attP2	942.844	648.548	-30.3489	0.872395	34.4924	29.3566	306.721	637.159	75.6739
Analyzed	CG33473	luna	27084	y[1] v[1]; P{y[+t7.7] v[+t1.8]=TRiP.JF02430}attP2	943.182	744.545	-20.5774	0.633048	33.7273	29.0157	282.727	660.455	89.333
Analyzed	CG1689	lz	27985	y[1] v[1]; P{y[+t7.7] v[+t1.8]=TRiP.JF02221}attP2	975.208	608.333	-32.6168	1.27842	24.5833	52.3881	369.375	605.833	42.5833
Analyzed	CG8118	mam	28046	y[1] v[1]; P{y[+t7.7] v[+t1.8]=TRiP.JF02881}attP2	925.556	474.444	-46.8425	1.1312	29.6667	36.1733	296.667	628.889	67.417
Analyzed	CG33197	mbl	29585	y[1] v[1]; P{y[+t7.7] v[+t1.8]=TRiP.JF03264}attP2/TM3, Sb[1]	987.5	329.375	-67.0211	0.781244	34.5	29.6071	331.875	655.625	76.333
Analyzed	CG3879	Mdr49	32405	y[1] sc[*] v[1]; P{y[+t7.7] v[+t1.8]=TRiP.HMS00400}attP2	905	765.714	-14.1048	1.11028	31.1429	29.2621	253.571	651.429	106.375
Analyzed	CG33935	mei-217	54038	y[1] v[1]; P{y[+t7.7] v[+t1.8]=TRiP.HMJ21481}attP40	902.222	894.444	0.441391	0.884261	35.2778	27.7719	343.333	558.889	89.583
Analyzed	CG15162	MESR3	50509	y[1] v[1]; P{y[+t7.7] v[+t1.8]=TRiP.GLC01393}attP2	936.333	796.333	-15.1781	1.16523	31.5333	31.1348	293.333	643	71.5
Analyzed	CG5747	mfr	35689	y[1] sc[*] v[1]; P{y[+t7.7] v[+t1.8]=TRiP.GLV21054}attP2	939.118	770	-15.6995	1.34869	35.5882	27.3876	306.176	632.941	100.75
Analyzed	CG13778	Mnn1	31220	y[1] v[1]; P{y[+t7.7] v[+t1.8]=TRiP.JF01775}attP2	919.2	792.8	-13.1862	1.34895	29.24	32.5663	277.6	641.6	90.333
Analyzed	CG42543	Mp	28299	y[1] v[1]; P{y[+t7.7] v[+t1.8]=TRiP.JF02929}attP2	1077.5	754.375	-29.965	0.920769	30.5	35.9046	403.75	673.75	60.083
Analyzed	CG6214	MRP	38316	y[1] sc[*] v[1]; P{y[+t7.7] v[+t1.8]=TRiP.HMS01780}attP2	1013.12	837.812	-17.0272	0.901043	36.125	29.6303	364.688	648.438	60.167
Analyzed	CG32178	Msi	56044	y[1] sc[*] v[1]; P{y[+t7.7] v[+t1.8]=TRiP.HMC04352}attP40	959.231	801.923	-14.9254	1.25627	32.1538	33.507	328.846	630.385	91.292
Analyzed	CG10145	mspo	29460	y[1] v[1]; P{y[+t7.7] v[+t1.8]=TRiP.JF03397}attP2	914.412	805	-7.17339	1.02975	35.4118	28.534	317.059	597.353	45.5833
Analyzed	CG8985	MsR1	27529	y[1] v[1]; P{y[+t7.7] v[+t1.8]=TRiP.JF02680}attP2	830	616.364	-21.2163	0.900161	38.7273	22.0738	268.636	561.364	44.5
Analyzed	CG17061	mthl10	51753	y[1] v[1]; P{y[+t7.7] v[+t1.8]=TRiP.HMC03304}attP2	922.931	706.724	-21.7751	0.909581	34.1724	28.916	314.31	608.621	86.333
Analyzed	CG6536	mthl4	55244	y[1] v[1]; P{y[+t7.7] v[+t1.8]=TRiP.HMC02422}attP2	873.125	781.562	-9.50323	0.827589	35.625	25.5987	274.688	598.438	67.208
Analyzed	CG16992	mthl6	44497	y[1] sc[*] v[1]; P{y[+t7.7] v[+t1.8]=TRiP.HMC02432}attP2	707	825	27.9967	0.835903	41	18.0588	400	307	48.1667
Analyzed	CG7476	mthl7	44498	y[1] sc[*] v[1]; P{y[+t7.7] v[+t1.8]=TRiP.HMC02433}attP2	376.5	416.5	47.553	1.16477	36	10.6834	147	229.5	47.5
Analyzed	CG32475	mthl8	60373	y[1] v[1]; P{y[+t7.7] v[+t1.8]=TRiP.HMJ22590}attP40	1100.62	853.125	-21.7699	0.681926	28	41.9514	420.938	679.688	68.375
Analyzed	CG42631	mtTFB1	28054	y[1] v[1]; P{y[+t7.7] v[+t1.8]=TRiP.JF02890}attP2	963	533.5	-44.2707	0.950496	35.9	28.0168	331.5	631.5	20.625
Analyzed	CG1960	mu2	61199	y[1] v[1]; P{y[+t7.7] v[+t1.8]=TRiP.HMJ22920}attP40	794	535	-36.8977	0.962613	28.8	32.0117	197	597	77.4
Analyzed	CG4090	Mur89F	56041	y[1] sc[*] v[1]; P{y[+t7.7] v[+t1.8]=TRiP.HMC04349}attP40	866.429	392.143	-52.5325	1.04635	33.2857	35.6898	214.286	652.143	62.167
Analyzed	CG14796	Mur2B	44489	y[1] v[1]; P{y[+t7.7] v[+t1.8]=TRiP.HMC02403}attP2	1001.67	821.667	-17.6219	0.966619	30.8889	33.478	345.556	656.111	93.667
Analyzed	CG7972	mus301	58299	y[1] v[1]; P{y[+t7.7] v[+t1.8]=TRiP.HMJ22406}attP40/CyO	882.857	686.429	-21.0454	1.09824	31.5714	29.6477	249.643	633.214	69.083
Analyzed	CG3671	Mvl	55316	y[1] v[1]; P{y[+t7.7] v[+t1.8]=TRiP.HMC04003}attP40	781.25	731.875	-6.45677	1.00063	27.125	30.5962	139.375	641.875	92.25
Analyzed	CG5501	Myo95E	62967	y[1] v[1]; P{y[+t7.7] v[+t1.8]=TRiP.HMJ30044}attP40	996.389	739.722	-25.9055	0.831949	24.2222	42.1068	314.444	681.944	62.667
Analyzed	CG31216	Naam	44053	y[1] sc[*] v[1]; P{y[+t7.7] v[+t1.8]=TRiP.HMS02770}attP40	985.833	794.167	-19.2443	0.850105	33.4167	30.9958	333.333	652.5	93.5
Analyzed	CG32538	nAChRalpha7	27251	y[1] v[1]; P{y[+t7.7] v[+t1.8]=TRiP.JF02570}attP2	877.5	726.25	-16.3247	1.31884	36.3125	25.4458	270.312	607.188	58.083
Analyzed	CG11822	nAChRbeta3	25927	y[1] v[1]; P{y[+t7.7] v[+t1.8]=TRiP.JF01947}attP2	856.842	868.947	1.82538	0.920777	36.5789	23.9875	263.158	593.684	70.583
Analyzed	CG10250	nau	50607	y[1] v[1]; P{y[+t7.7] v[+t1.8]=TRiP.HMC02974}attP2	903.529	663.824	-25.6103	1.06421	33.4706	29.0162	294.706	608.824	79.125
Analyzed	CG18660	Nckx30C	63570	y[1] v[1]; P{y[+t7.7] v[+t1.8]=TRiP.HMJ30136}attP40	1045.62	815.625	-20.631	0.972775	37.75	30.6593	431.562	614.062	85.458
Analyzed	CG5994	Nelf-E	32835	y[1] sc[*] v[1]; P{y[+t7.7] v[+t1.8]=TRiP.HMS00525}attP2/TM3, Sb[1]	833.333	603.889	-20.9748	1.21909	35.5556	24.9747	327.222	506.111	15.25
Analyzed	CG11450	net	26204	y[1] v[1]; P{y[+t7.7] v[+t1.8]=TRiP.JF02102}attP2	923.214	516.786	-45.2452	0.838745	35.5714	27.1894	279.643	643.571	55.292
Analyzed	CG18657	NetA	31288	y[1] v[1]; P{y[+t7.7] v[+t1.8]=TRiP.JF01232}attP2	878.333	563.333	-32.665	0.784966	40.6667	22.1183	303.333	575	17.4167
Analyzed	CG10521	NetB	25861	y[1] v[1]; P{y[+t7.7] v[+t1.8]=TRiP.JF01882}attP2	1065.42	818.75	-22.7938	0.957881	32	34.116	402.917	662.5	47.4167
Analyzed	CG10806	Nha1	41897	y[1] v[1]; P{y[+t7.7] v[+t1.8]=TRiP.GL01329}attP40	895.357	237.5	-73.2609	0.849393	39.5	23.1748	337.5	557.857	108.75
Analyzed	CG12178	Nhe1	28589	y[1] v[1]; P{y[+t7.7] v[+t1.8]=TRiP.HM05077}attP2	911.667	421.667	-53.1032	0.606957	46	21.0426	338.333	573.333	24.8333
Analyzed	CG34139	Nlg4	38265	y[1] sc[*] v[1]; P{y[+t7.7] v[+t1.8]=TRiP.HMS01710}attP40	863.75	693.75	-18.2548	0.735339	38.75	23.759	293.25	570.5	105.292
Analyzed	CG33513	Nmdar2	26019	y[1] v[1]; P{y[+t7.7] v[+t1.8]=TRiP.JF02044}attP2	932.429	671.286	-27.9504	0.897913	31.1429	32.2574	286	646.429	62.917
Analyzed	CG7892	nmo	42570	y[1] v[1]; P{y[+t7.7] v[+t1.8]=TRiP.HMJ02229}attP40	942.5	720	-23.7255	0.609986	31.8333	30.354	301.667	640.833	105.042
Analyzed	CG32743	nonC	31094	y[1] v[1]; P{y[+t7.7] v[+t1.8]=TRiP.JF01559}attP2	960.938	737.812	-21.0179	0.842972	38.75	26.4381	340.312	620.625	46.5833
Analyzed	CG30418	nord	35668	y[1] sc[*] v[1]; P{y[+t7.7] v[+t1.8]=TRiP.GLV21033}attP2/TM3, Sb[1]	970.556	748.333	-22.0408	0.670238	35.5556	28.7735	360.25	610.65	85.75
Analyzed	CG3620	norpA	31113	y[1] v[1]; P{y[+t7.7] v[+t1.8]=TRiP.JF01585}attP2	1070.33	779.333	-26.8529	1.02453	34.6	33.336	401.667	668.667	72.417
Analyzed	CG6713	Nos	28792	y[1] v[1]; P{y[+t7.7] v[+t1.8]=TRiP.JF03220}attP2	946.852	717.963	-23.3105	1.14692	36.2222	28.1165	345.185	601.667	88.625
Analyzed	CG13076	Notum	35650	y[1] sc[*] v[1]; P{y[+t7.7] v[+t1.8]=TRiP.GLV21015}attP2	993.462	712.692	-28.4762	0.840577	30.1538	33.9152	327.308	666.154	75.583
Analyzed	CG5722	Npc1a	37504	y[1] sc[*] v[1]; P{y[+t7.7] v[+t1.8]=TRiP.HMS01646}attP40	826.481	730	-10.0353	2.25726	40.2963	21.3936	243.704	582.778	101.542
Analyzed	CG9704	Nrt	28742	y[1] v[1]; P{y[+t7.7] v[+t1.8]=TRiP.JF03170}attP2	781.25	654.167	-17.4163	0.989786	40.6667	19.8804	232.917	548.333	34.8333
Analyzed	CG9258	nrv1	41829	y[1] v[1]; P{y[+t7.7] v[+t1.8]=TRiP.GL01257}attP2	764.231	804.615	12.4199	0.903196	39.1538	19.9785	263.077	501.154	63.417
Analyzed	CG34395	nub	28338	y[1] v[1]; P{y[+t7.7] v[+t1.8]=TRiP.JF02973}attP2	1091.54	588.077	-46.3568	0.632645	32.7692	34.2264	408.462	683.077	15.9167
Analyzed	CG33991	nuf	31381	y[1] v[1]; P{y[+t7.7] v[+t1.8]=TRiP.JF01350}attP2	998.235	702.647	-29.2958	0.903546	33.7647	31.0444	329.118	669.118	47.5
Analyzed	CG10198	Nup98-96	28562	y[1] v[1]; P{y[+t7.7] v[+t1.8]=TRiP.HM05048}attP2	931.875	610.625	-34.5685	0.797831	33.625	29.1797	303.438	628.438	59.875
Analyzed	CG3385	nvy	29413	y[1] v[1]; P{y[+t7.7] v[+t1.8]=TRiP.JF03349}attP2	1058.81	821.429	-22.4331	1.02652	33.0476	35.6088	435	612.619	58.917
Analyzed	CG9884	oaf	40926	y[1] v[1]; P{y[+t7.7] v[+t1.8]=TRiP.HMS02174}attP40	900	804.706	-9.89287	0.973902	36.8235	27.0508	349.706	550.294	53.833
Analyzed	CG3856	Oamb	31171	y[1] v[1]; P{y[+t7.7] v[+t1.8]=TRiP.JF01673}attP2	901.111	751.667	-15.6275	1.29872	21	51.3658	219.444	681.667	32.4167
Analyzed	CG30072	Obp50c	58255	y[1] v[1]; P{y[+t7.7] v[+t1.8]=TRiP.HMJ22319}attP40	931.667	694.444	-23.0977	0.972169	27.8889	40.7209	313.889	617.778	92.333
Analyzed	CG33976	Octbeta2R	50580	y[1] v[1]; P{y[+t7.7] v[+t1.8]=TRiP.GLC01702}attP40	941.25	688.75	-25.1413	1.48127	30.1944	32.7531	291.111	650.139	76.375
Analyzed	CG3851	odd	28295	y[1] v[1]; P{y[+t7.7] v[+t1.8]=TRiP.JF02925}attP2	874.375	621.562	-27.644	0.728241	41.25	22.3517	291.25	583.125	58.083
Analyzed	CG3736	okr	31047	y[1] v[1]; P{y[+t7.7] v[+t1.8]=TRiP.JF01494}attP2	867.917	514.583	-36.6911	1.07032	36.5833	25.3517	267.083	600.833	66.292
Analyzed	CG12673	olf413	29547	y[1] v[1]; P{y[+t7.7] v[+t1.8]=TRiP.JF02439}attP2	856.875	629.062	-24.6458	1.36101	40.6875	22.6142	268.125	588.75	81.917
Analyzed	CG8479	Opa1	32358	y[1] sc[*] v[1]; P{y[+t7.7] v[+t1.8]=TRiP.HMS00349}attP2	843.125	521.562	-37.4937	1.08991	33.1875	26.9203	245.625	597.5	58.042
Analyzed	CG14157	Or67d	31280	y[1] v[1]; P{y[+t7.7] v[+t1.8]=TRiP.JF01221}attP2	852.917	578.333	-32.5947	0.922026	36.25	24.6075	253.333	599.583	44.8333
Analyzed	CG43782	orb2	27050	y[1] v[1]; P{y[+t7.7] v[+t1.8]=TRiP.JF02376}attP2	1100.71	782.857	-28.7682	1.13163	29.1429	38.5872	398.571	702.143	51.9167
Analyzed	CG7082	papi	38216	y[1] sc[*] v[1]; P{y[+t7.7] v[+t1.8]=TRiP.HMS01282}attP2/TM3, Sb[1]	922.727	754.091	-17.8967	0.754156	33.5455	27.9768	294.091	628.636	70.417
Analyzed	CG7761	pcs	61915	y[1] v[1]; P{y[+t7.7] v[+t1.8]=TRiP.HMJ23471}attP40	1056.25	291.25	-70.3385	1.01399	27.5	38.6667	363.75	692.5	27.1667
Analyzed	CG3443	pcx	28552	y[1] v[1]; P{y[+t7.7] v[+t1.8]=TRiP.HM05038}attP2/TM3, Sb[1]	740.333	585.333	3.19538	1.15714	31.6667	26.2234	209	531.333	5.4167
Analyzed	CG34341	Pde11	34611	y[1] sc[*] v[1]; P{y[+t7.7] v[+t1.8]=TRiP.HMS01286}attP2	973.696	743.696	-23.0248	1.12574	34.3478	29.9028	323.261	650.435	76.417
Analyzed	CG45019	Pde8	51892	y[1] v[1]; P{y[+t7.7] v[+t1.8]=TRiP.HMC03466}attP40	1011.67	776.111	-21.7198	1.65637	29.2778	37.8831	355.556	656.111	71.208
Analyzed	CG42276	Pde9	32412	y[1] sc[*] v[1]; P{y[+t7.7] v[+t1.8]=TRiP.HMS00407}attP2	976.389	986.944	2.28996	1.16938	34.2778	29.5611	406.389	570	62.667
Analyzed	CG13758	Pdfr	38347	y[1] v[1]; P{y[+t7.7] v[+t1.8]=TRiP.HMS01815}attP40	1017.69	766.154	-24.1017	0.771851	37.5385	28.4374	396.538	621.154	78.833
Analyzed	CG17888	Pdp1	40863	y[1] v[1]; P{y[+t7.7] v[+t1.8]=TRiP.HMS02030}attP40	954.857	796.143	-15.7897	0.910869	41.0571	25.5105	360.143	594.714	64.083
Analyzed	CG3127	Pgk	28053	y[1] v[1]; P{y[+t7.7] v[+t1.8]=TRiP.JF02889}attP2/TM3, Sb[1]	863.571	627.143	-24.197	0.970639	38.6071	23.8589	294.286	578.214	67.75
Analyzed	CG31022	PH4alphaEFB	33695	y[1] sc[*] v[1]; P{y[+t7.7] v[+t1.8]=TRiP.HMS00567}attP2	1052.5	813.75	-16.797	1.41373	26.875	56.8866	408.75	643.75	-6.2917
Analyzed	CG44099	pHCl	38909	y[1] sc[*] v[1]; P{y[+t7.7] v[+t1.8]=TRiP.GL00681}attP2	941.346	954.615	1.84908	1.24399	47.5769	20.4451	407.692	533.654	49.0833
Analyzed	CG18412	ph-p	31608	y[1] v[1]; P{y[+t7.7] v[+t1.8]=TRiP.JF01392}attP2	914.615	546.538	-40.1804	0.930541	42.1538	22.4943	334.615	580	80.083
Analyzed	CG3973	pigs	51490	y[1] v[1]; P{y[+t7.7] v[+t1.8]=TRiP.HMC03241}attP2	738.462	717.308	1.9558	0.911855	41.2308	19.2004	196.154	542.308	100.25
Analyzed	CG4710	Pino	43971	y[1] v[1]; P{y[+t7.7] v[+t1.8]=TRiP.GL01581}attP2	965.769	685.769	-27.1024	1.0699	34.4615	29.9619	321.154	644.615	85.833
Analyzed	CG9614	pip	34613	y[1] sc[*] v[1]; P{y[+t7.7] v[+t1.8]=TRiP.HMS01288}attP2	738	585	-18.4029	1.03723	36	21.4035	199.5	538.5	83.75
Analyzed	CG6117	Pka-C3	39050	y[1] sc[*] v[1]; P{y[+t7.7] v[+t1.8]=TRiP.HMS01970}attP2	944	792.4	-15.1207	1.15107	37.36	26.5168	320	624	61.625
Analyzed	CG6504	Pkd2	31296	y[1] v[1]; P{y[+t7.7] v[+t1.8]=TRiP.JF01241}attP2	927.778	589.444	-35.8547	0.958891	29.8148	33.3228	278.519	649.259	71.333
Analyzed	CG4574	Plc21C	31269	y[1] v[1]; P{y[+t7.7] v[+t1.8]=TRiP.JF01210}attP2	882.907	510.233	-41.6111	1.00399	32.2791	28.6072	234.302	648.605	79.583
Analyzed	CG5212	Pli	36787	y[1] sc[*] v[1]; P{y[+t7.7] v[+t1.8]=TRiP.GL00524}attP2	885	708.75	-17.9605	0.834374	33.5	28.233	290	595	95.417
Analyzed	CG6199	Plod	34911	y[1] sc[*] v[1]; P{y[+t7.7] v[+t1.8]=TRiP.HMS01259}attP2	1056.82	691.818	-33.8288	0.968197	30.9091	41.0547	398.636	658.182	69.417
Analyzed	CG4532	pod1	31219	y[1] v[1]; P{y[+t7.7] v[+t1.8]=TRiP.JF01774}attP2	1074.17	792.917	-26.9336	0.793975	30.1667	55.5446	411.25	662.917	74.083
Analyzed	CG8246	Poxn	26238	y[1] v[1]; P{y[+t7.7] v[+t1.8]=TRiP.JF02136}attP2	944.444	726.111	-23.2396	1.57548	31.1111	31.5841	288.333	656.111	49.3333
Analyzed	CG2984	Pp2C1	40827	y[1] sc[*] v[1]; P{y[+t7.7] v[+t1.8]=TRiP.HMS01887}attP2	906.875	699.375	-21.1462	0.812014	36	26.9346	291.875	615	72.167
Analyzed	CG11209	ppk6	25880	y[1] v[1]; P{y[+t7.7] v[+t1.8]=TRiP.JF01919}attP2	927.083	800	-9.54551	1.05474	39.9167	24.7857	362.083	565	81.042
Analyzed	CG7105	Proc	29570	y[1] v[1]; P{y[+t7.7] v[+t1.8]=TRiP.JF03249}attP2	924.688	691.562	-23.7171	0.758065	36.6875	26.2285	301.562	623.125	74
Analyzed	CG6986	Proc-R	29414	y[1] v[1]; P{y[+t7.7] v[+t1.8]=TRiP.JF03350}attP2	880	669.375	-20.8045	0.945297	37.4375	24.8587	304.062	575.938	114.792
Analyzed	CG5648	Prosalpha6T	55243	y[1] sc[*] v[1]; P{y[+t7.7] v[+t1.8]=TRiP.HMC02418}attP2	872.222	680.556	-22.0161	0.616142	42.2222	22.7661	281.111	591.111	101.25
Analyzed	CG30483	Prosap	27284	y[1] v[1]; P{y[+t7.7] v[+t1.8]=TRiP.JF02596}attP2	830	855.714	6.67666	1.21658	42.8571	19.6467	325.714	504.286	11.7083
Analyzed	CG1009	Psa	34674	y[1] sc[*] v[1]; P{y[+t7.7] v[+t1.8]=TRiP.HMS01152}attP2	742.812	1021.88	47.3816	0.822705	44.875	17.7557	244.375	498.438	76.167
Analyzed	CG3886	Psc	31611	y[1] v[1]; P{y[+t7.7] v[+t1.8]=TRiP.JF01395}attP2	834.4	569.4	-31.4109	1.08245	38.2	31.6186	274.2	560.2	74.875
Analyzed	CG13687	Ptth	31380	y[1] v[1]; P{y[+t7.7] v[+t1.8]=TRiP.JF01349}attP2/TM3, Ser[1]	1056.67	654.583	-37.665	0.857901	34.0833	32.2802	400	656.667	71.5
Analyzed	CG13780	Pvf2	61955	y[1] v[1]; P{y[+t7.7] v[+t1.8]=TRiP.HMJ23540}attP40/CyO	1023.46	818.846	-19.693	1.01273	29.3846	37.0705	347.308	666.923	76.667
Analyzed	CG34378	Pvf3	38962	y[1] v[1]; P{y[+t7.7] v[+t1.8]=TRiP.HMS01876}attP40/CyO	1106.67	790.952	-27.6575	1.06596	27.8571	43.0543	431.429	675.238	77.083
Analyzed	CG43140	pyd	28920	y[1] v[1]; P{y[+t7.7] v[+t1.8]=TRiP.HM05131}attP2	831.25	915	12.857	1.1402	36.25	24.2005	235	596.25	80.167
Analyzed	CG17142	pyx	31297	y[1] v[1]; P{y[+t7.7] v[+t1.8]=TRiP.JF01242}attP2	877.778	617.222	-29.3557	1.19093	34.9444	26.6805	243.611	634.167	62.208
Analyzed	CG4816	qkr54B	34896	y[1] sc[*] v[1]; P{y[+t7.7] v[+t1.8]=TRiP.HMS01241}attP2	1007.14	569.286	-41.4372	1.15015	32.1429	32.5259	363.571	643.571	62.75
Analyzed	CG6433	qua	41856	y[1] v[1]; P{y[+t7.7] v[+t1.8]=TRiP.GL01284}attP2	945.806	872.419	-6.83387	1.29416	35.8065	28.1671	327.097	618.71	52.042
Analyzed	CG33472	qvr	58061	y[1] v[1]; P{y[+t7.7] v[+t1.8]=TRiP.HMJ21916}attP40	577.778	1295.56	142.643	1.31279	53.2222	10.8367	201.667	376.111	20.3333
Analyzed	CG7138	r2d2	34784	y[1] sc[*] v[1]; P{y[+t7.7] v[+t1.8]=TRiP.HMS00093}attP2/TM3, Sb[1]	590.455	533.409	-3.01979	1.45477	31.7273	20.5874	208.182	400.682	65.208
Analyzed	CG7062	Rab-RP3	34607	y[1] sc[*] v[1]; P{y[+t7.7] v[+t1.8]=TRiP.HMS00592}attP2	883.125	623.438	-28.604	0.768308	29.75	31.6421	231.875	651.25	69.583
Analyzed	CG44424	rad	57574	y[1] sc[*] v[1]; P{y[+t7.7] v[+t1.8]=TRiP.HMC04555}attP40	1107.5	732.083	-33.0892	1.50385	29.9167	38.6459	407.917	699.583	67.125
Analyzed	CG6721	RasGAP1	41830	y[1] v[1]; P{y[+t7.7] v[+t1.8]=TRiP.GL01258}attP2	996.129	849.516	-14.8576	1.09075	32.8065	31.8211	337.742	658.387	80.708
Analyzed	CG4429	Rbp2	43275	y[1] sc[*] v[1]; P{y[+t7.7] v[+t1.8]=TRiP.GLC01464}attP2	908.5	865.5	-4.1965	0.855754	37.6	26.2101	302	606.5	93.667
Analyzed	CG32169	Rbp6	61324	y[1] v[1]; P{y[+t7.7] v[+t1.8]=TRiP.HMJ23159}attP40	1366.67	1205	-11.657	3.42475	9.11111	224.704	682.778	683.889	49
Analyzed	CG3151	Rbp9	28669	y[1] v[1]; P{y[+t7.7] v[+t1.8]=TRiP.JF03084}attP2	890.625	737.5	-17.6148	1.37272	39.5	23.3314	269.688	620.938	72.958
Analyzed	CG42667	rdgA	29435	y[1] v[1]; P{y[+t7.7] v[+t1.8]=TRiP.JF03371}attP2	900	963.333	7.49552	1.22779	34.6667	27.2348	330	570	71.167
Analyzed	CG11111	rdgB	28796	y[1] v[1]; P{y[+t7.7] v[+t1.8]=TRiP.JF03224}attP2	875.588	664.265	-23.337	1.66942	38.2647	24.7824	292.941	582.647	53.333
Analyzed	CG10537	Rdl	31286	y[1] v[1]; P{y[+t7.7] v[+t1.8]=TRiP.JF01227}attP2	899.5	674	-24.664	1.05066	35.2	25.9667	266	633.5	36.875
Analyzed	CG3920	Reph	41658	y[1] v[1]; P{y[+t7.7] v[+t1.8]=TRiP.GL01240}attP2	878.125	695.625	-19.9967	1.2228	30	30.0497	220.625	657.5	104.333
Analyzed	CG5403	retn	26309	y[1] v[1]; P{y[+t7.7] v[+t1.8]=TRiP.JF02082}attP2	1025.14	682.778	-33.2938	1.1918	28.1944	39.8728	357.5	667.639	41
Analyzed	CG42274	RhoGAP18B	31165	y[1] v[1]; P{y[+t7.7] v[+t1.8]=TRiP.JF01658}attP2	801.25	658.75	-16.658	0.902089	46.5	17.8914	307.5	493.75	66.458
Analyzed	CG1412	RhoGAP19D	32361	y[1] sc[*] v[1]; P{y[+t7.7] v[+t1.8]=TRiP.HMS00352}attP2	760	897	19.4139	1.6732	30.6	26.8321	258	502	59.667
Analyzed	CG32149	RhoGAP71E	32417	y[1] sc[*] v[1]; P{y[+t7.7] v[+t1.8]=TRiP.HMS00412}attP2	820	873	9.41083	1.69056	38.0667	22.7141	228.667	591.333	63.542
Analyzed	CG4755	RhoGAP92B	33391	y[1] sc[*] v[1]; P{y[+t7.7] v[+t1.8]=TRiP.HMS00268}attP2	852.5	700	-17.3182	1.56928	29.8333	30.2808	233.333	619.167	73.833
Analyzed	CG3421	RhoGAP93B	31167	y[1] v[1]; P{y[+t7.7] v[+t1.8]=TRiP.JF01660}attP2	1022.5	775.5	-23.9273	0.92591	29.1	36.9023	338	684.5	71.958
Analyzed	CG32239	RhoGEF64C	31130	y[1] v[1]; P{y[+t7.7] v[+t1.8]=TRiP.JF01604}attP2	1045.83	827.5	-20.7263	1.12302	35.5	31.1253	398.611	647.222	49
Analyzed	CG30085	Rif1	51051	y[1] v[1]; P{y[+t7.7] v[+t1.8]=TRiP.HMJ21185}attP40	739.615	597.308	-17.8727	1.0017	31.9231	23.8716	156.923	582.692	87.5
Analyzed	CG33547	Rim	27300	y[1] v[1]; P{y[+t7.7] v[+t1.8]=TRiP.JF02610}attP2	935.625	727.5	-21.9658	0.960979	40.625	23.7744	329.375	606.25	70.292
Analyzed	CG6606	Rip11	38325	y[1] sc[*] v[1]; P{y[+t7.7] v[+t1.8]=TRiP.HMS01792}attP2	841.905	750.714	-9.7646	1.03497	38.0952	24.0947	293.333	548.571	69.708
Analyzed	CG3312	Rnp4F	56854	y[1] sc[*] v[1]; P{y[+t7.7] v[+t1.8]=TRiP.HMS02384}attP40	954.615	881.154	-7.44865	1.30807	27.1538	36.0632	272.692	681.923	77.667
Analyzed	CG34145	RunxA	33353	y[1] sc[*] v[1]; P{y[+t7.7] v[+t1.8]=TRiP.HMS00224}attP2	1012.94	997.353	29.2335	1.59879	23.7059	105.438	517.941	495	59.75
Analyzed	CG42267	RunxB	57456	y[1] sc[*] v[1]; P{y[+t7.7] v[+t1.8]=TRiP.HMC04765}attP40	1425	1360	-4.5614	3.26667	2	712.5	170	605	33.8333
Analyzed	CG4385	S	38914	y[1] sc[*] v[1]; P{y[+t7.7] v[+t1.8]=TRiP.GL00686}attP2	926.29	739.839	-18.7384	1.13462	38.5484	28.1653	360.645	565.645	73.75
Analyzed	CG8884	Sap47	27527	y[1] v[1]; P{y[+t7.7] v[+t1.8]=TRiP.JF02677}attP2	823.611	573.333	-27.8115	1.21533	42.1667	20.8649	319.722	503.889	50.2917
Analyzed	CG13598	sba	51488	y[1] v[1]; P{y[+t7.7] v[+t1.8]=TRiP.HMC03239}attP2	1041.19	821.429	-21.5027	1.10392	26.5714	39.6151	348.81	692.381	94.5
Analyzed	CG17579	sca	56928	y[1] sc[*] v[1]; P{y[+t7.7] v[+t1.8]=TRiP.HMC04367}attP2	927.857	763.214	-15.1526	1.19333	42.8571	22.8107	339.286	588.571	86
Analyzed	CG5227	sdk	33412	y[1] sc[*] v[1]; P{y[+t7.7] v[+t1.8]=TRiP.HMS00292}attP2	838.125	657.5	-20.4147	1.01144	29.375	29.1302	202.812	635.312	92.292
Analyzed	CG6773	Sec13	32468	y[1] sc[*] v[1]; P{y[+t7.7] v[+t1.8]=TRiP.HMS00468}attP2	721.25	700	1.08184	1.0088	25.25	57.6133	281.875	566.25	86.333
Analyzed	CG32654	Sec16	53917	y[1] v[1]; P{y[+t7.7] v[+t1.8]=TRiP.HMJ21252}attP40	881.562	580.312	-33.8975	0.896599	32.3125	28.1853	241.25	640.312	90.375
Analyzed	CG15154	Socs36E	35036	y[1] sc[*] v[1]; P{y[+t7.7] v[+t1.8]=TRiP.HMS01450}attP2	943.214	651.964	-30.5545	0.72715	33.6786	29.6183	303.75	622.083	54.5
Analyzed	CG31632	sens-2	27285	y[1] v[1]; P{y[+t7.7] v[+t1.8]=TRiP.JF02598}attP2	1080.62	844.688	-21.422	0.744619	33.4375	35.9454	430.625	650	79.417
Analyzed	CG9699	Septin4	31119	y[1] v[1]; P{y[+t7.7] v[+t1.8]=TRiP.JF01592}attP2	1086.33	794.333	-26.3337	0.765061	32.7333	34.8976	424.333	662	50.6667
Analyzed	CG6114	sff	55897	y[1] v[1]; P{y[+t7.7] v[+t1.8]=TRiP.HMC04176}attP2	1026.25	783.333	-23.3693	0.777603	33.9167	33.9476	392.5	633.75	78.542
Analyzed	CG2621	sgg	31308	y[1] v[1]; P{y[+t7.7] v[+t1.8]=TRiP.JF01255}attP2	964.219	702.969	-26.5993	0.902576	40.1875	25.2143	333.438	630.781	84.375
Analyzed	CG5094	Sgt	61267	y[1] v[1]; P{y[+t7.7] v[+t1.8]=TRiP.HMJ23046}attP40	1031.56	987.5	-3.25194	1.1695	34.4375	34.786	429.688	601.875	71.958
Analyzed	CG43128	Shab	25805	y[1] v[1]; P{y[+t7.7] v[+t1.8]=TRiP.JF01823}attP2	953.214	553.929	-40.5514	0.862134	35.2857	28.6289	315.714	637.5	59.083
Analyzed	CG9262	Shal	31879	y[1] v[1]; P{y[+t7.7] v[+t1.8]=TRiP.JF02154}attP2	764.643	542.5	-21.9337	1.20097	36.0357	22.7925	203.214	561.429	85.208
Analyzed	CG2822	Shaw	28346	y[1] v[1]; P{y[+t7.7] v[+t1.8]=TRiP.JF02982}attP2	962.917	786.875	-17.3049	1.13931	36.0833	28.1488	319.167	643.75	79.708
Analyzed	CG34366	Shawl	25819	y[1] v[1]; P{y[+t7.7] v[+t1.8]=TRiP.JF01837}attP2	925.25	731.25	-20.4304	1.38985	35.65	27.002	292.5	632.75	74.917
Analyzed	CG7734	shn	34689	y[1] sc[*] v[1]; P{y[+t7.7] v[+t1.8]=TRiP.HMS01167}attP2/TM3, Sb[1]	1080	713.889	-31.9898	1.99	31.2222	62.1058	435.741	644.259	59
Analyzed	CG34379	Shroom	40942	y[1] sc[*] v[1]; P{y[+t7.7] v[+t1.8]=TRiP.HMS02190}attP2	925.455	892.727	-2.9202	1.66015	34	27.3445	301.364	624.091	80.25
Analyzed	CG34418	sif	25789	y[1] v[1]; P{y[+t7.7] v[+t1.8]=TRiP.JF01795}attP2	863.75	968.438	17.0358	1.06803	48.6875	21.153	362.5	501.25	56.667
Analyzed	CG4290	Sik2	55880	y[1] v[1]; P{y[+t7.7] v[+t1.8]=TRiP.HMC04153}attP2	945.185	648.519	-31.4236	1.00432	31.2963	31.6927	286.481	658.704	71.5
Analyzed	CG9188	sip2	33691	y[1] sc[*] v[1]; P{y[+t7.7] v[+t1.8]=TRiP.HMS00559}attP2	907.188	759.688	-7.45976	1.30429	35.625	26.8441	296.25	610.938	78.833
Analyzed	CG5216	Sir2	31636	y[1] v[1]; P{y[+t7.7] v[+t1.8]=TRiP.JF01423}attP2	899.545	680.455	-24.6328	0.95049	31.9091	28.885	248.182	651.364	52.5
Analyzed	CG43758	sli	31467	y[1] v[1]; P{y[+t7.7] v[+t1.8]=TRiP.JF01228}attP2	998.438	809.062	-17.8558	1.4378	38.8125	26.6346	391.25	607.188	74.042
Analyzed	CG31660	smog	43135	y[1] v[1]; P{y[+t7.7] v[+t1.8]=TRiP.GL01473}attP2	925.625	810.312	-11.0069	1.1151	39.125	25.6417	311.25	614.375	82.708
Analyzed	CG34421	Snoo	31934	y[1] v[1]; P{y[+t7.7] v[+t1.8]=TRiP.JF02225}attP2	788.438	557.5	-28.2918	1.57189	40	20.4344	230.625	571.875	64.167
Analyzed	CG8749	snRNP-U1-70K	33396	y[1] sc[*] v[1]; P{y[+t7.7] v[+t1.8]=TRiP.HMS00274}attP2	1005.62	975.833	2.40491	1.42329	32.4167	33.0572	378.542	627.083	32.1667
Analyzed	CG3242	sob	34648	y[1] sc[*] v[1]; P{y[+t7.7] v[+t1.8]=TRiP.HMS01123}attP2	925.122	887.317	-2.48112	1.15385	37.2927	26.6114	292.073	633.049	96.333
Analyzed	CG15552	Sox100B	35656	y[1] sc[*] v[1]; P{y[+t7.7] v[+t1.8]=TRiP.GLV21021}attP2	922.5	667.5	-27.7551	1.08669	44	21.1771	322.5	600	0
Analyzed	CG32139	Sox21b	60120	y[1] sc[*] v[1]; P{y[+t7.7] v[+t1.8]=TRiP.HMC05114}attP40	981.25	783.438	-20.0367	0.973694	29.375	37.6124	323.75	657.5	95.875
Analyzed	CG8403	SP2353	51732	y[1] sc[*] v[1]; P{y[+t7.7] v[+t1.8]=TRiP.HMC03287}attP2/TM3, Sb[1] Ser[1]	748.846	686.154	-8.15219	0.954412	36.3846	21.1455	227.692	521.154	42.5
Analyzed	CG5677	Spase22-23	31499	y[1] v[1]; P{y[+t7.7] v[+t1.8]=TRiP.HM04003}attP2	944.444	574.444	-37.2074	0.906914	36.6667	27.1196	320.556	623.889	48.4167
Analyzed	CG32382	sphinx2	52879	y[1] sc[*] v[1]; P{y[+t7.7] v[+t1.8]=TRiP.HMC03617}attP40	847.778	840	0.0730866	0.982318	38.8889	22.1783	242.778	605	96.083
Analyzed	CG8428	spin	27702	y[1] v[1]; P{y[+t7.7] v[+t1.8]=TRiP.JF02782}attP2	930.312	641.25	-31.1355	1.2191	32.4375	29.1962	266.25	650.938	47.4167
Analyzed	CG16757	Spn	28956	y[1] v[1]; P{y[+t7.7] v[+t1.8]=TRiP.HM05167}attP2	965.946	693.784	-26.8188	0.841454	34	30.3673	326.351	639.595	74.75
Analyzed	CG18525	Spn88Ea	34381	y[1] sc[*] v[1]; P{y[+t7.7] v[+t1.8]=TRiP.HMS01371}attP2	846.111	740.278	-12.9769	0.945255	21	101.627	348.5	629	69.292
Analyzed	CG5669	Spps	62185	y[1] sc[*] v[1]; P{y[+t7.7] v[+t1.8]=TRiP.HMC05192}attP40	992.083	1348.75	46.473	1.00779	37.1667	31.1299	405	587.083	0.1667
Analyzed	CG10155	Spred	32852	y[1] sc[*] v[1]; P{y[+t7.7] v[+t1.8]=TRiP.HMS00637}attP2	721.5	377	-46.0183	1.18505	34.2	22.5752	157.5	564	72.125
Analyzed	CG7524	Src64B	30517	y[1] v[1]; P{y[+t7.7] v[+t1.8]=TRiP.JF03234}attP2	848.333	541.111	-35.2952	1.26988	43	20.4838	285.556	562.778	65.5
Analyzed	CG8174	SRPK	42813	y[1] sc[*] v[1]; P{y[+t7.7] v[+t1.8]=TRiP.GL00070}attP2/TM3, Sb[1]	870	791.739	-7.16009	1.08062	35.0435	26.1437	268.261	601.739	80.75
Analyzed	CG6993	ss	26208	y[1] v[1]; P{y[+t7.7] v[+t1.8]=TRiP.JF02106}attP2	855.625	784.375	-4.82332	0.962014	39.25	22.89	270.625	585	68.917
Analyzed	CG33166	stet	57698	y[1] sc[*] v[1]; P{y[+t7.7] v[+t1.8]=TRiP.GLC01864}attP2	891.875	719.062	-17.9725	1.07301	36.3125	25.7174	256.25	635.625	87.083
Analyzed	CG5559	Sytalpha	29308	y[1] v[1]; P{y[+t7.7] v[+t1.8]=TRiP.JF02448}attP2	990	748.438	-24.1383	1.04385	38	27.7114	352.188	637.812	80.333
Analyzed	CG3850	sug	27026	y[1] v[1]; P{y[+t7.7] v[+t1.8]=TRiP.JF02347}attP2	965	726.538	-23.639	1.02125	38.6923	25.9498	422.692	542.308	56.375
Analyzed	CG5772	Sur	36087	y[1] sc[*] v[1]; P{y[+t7.7] v[+t1.8]=TRiP.GL00506}attP2	937.917	808.75	-12.6329	0.95027	30.4167	31.8372	292.917	645	61.167
Analyzed	CG7869	SuUR	36893	y[1] sc[*] v[1]; P{y[+t7.7] v[+t1.8]=TRiP.GL01080}attP2	842.333	706.667	-12.9983	0.867002	29.8667	30.1092	224	618.333	72.917
Analyzed	CG10641	Swip-1	31585	y[1] v[1]; P{y[+t7.7] v[+t1.8]=TRiP.JF01160}attP2	912.667	869.667	-0.193424	1.22792	42.3333	24.0378	332.667	580	78.583
Analyzed	CG42333	Sytbeta	27293	y[1] v[1]; P{y[+t7.7] v[+t1.8]=TRiP.JF02593}attP2	914.375	883.75	0.663721	1.42652	37.375	26.1599	295.625	618.75	89.042
Analyzed	CG10327	TBPH	29517	y[1] v[1]; P{y[+t7.7] v[+t1.8]=TRiP.HM05194}attP2	1058.08	730.769	-31.3413	1.10527	33.5385	36.869	404.231	653.846	74.583
Analyzed	CG13472	Tdrd3	36819	y[1] sc[*] v[1]; P{y[+t7.7] v[+t1.8]=TRiP.GL01047}attP2	944.146	733.659	-20.7019	0.941709	35.3902	27.995	322.561	621.585	80.75
Analyzed	CG7121	Tehao	29533	y[1] v[1]; P{y[+t7.7] v[+t1.8]=TRiP.HM05212}attP2	813.696	675.652	-12.4624	1.11286	40.8696	21.8811	271.522	542.174	81.375
Analyzed	CG42338	Ten-a	29439	y[1] v[1]; P{y[+t7.7] v[+t1.8]=TRiP.JF03375}attP2	973.182	617.273	-36.5612	0.780114	33.8182	30.9867	327.273	645.909	70.833
Analyzed	CG3234	tim	29583	y[1] v[1]; P{y[+t7.7] v[+t1.8]=TRiP.JF03262}attP2	905.455	682.273	-22.5657	1.17031	33.7727	27.6869	269.318	636.136	78.25
Analyzed	CG7887	TkR99D	27513	y[1] v[1]; P{y[+t7.7] v[+t1.8]=TRiP.JF02663}attP2	899.062	662.812	-24.8422	0.972997	38.375	24.9276	321.562	577.5	60.667
Analyzed	CG4898	Tm1	56869	y[1] v[1]; P{y[+t7.7] v[+t1.8]=TRiP.HMS03526}attP40	877.059	700.294	-19.8764	1.85679	38.7647	23.4032	263.235	613.824	75.75
Analyzed	CG1539	tmod	31534	y[1] v[1]; P{y[+t7.7] v[+t1.8]=TRiP.JF01094}attP2	796.29	656.129	-16.9573	1.73093	33.6774	25.4025	203.548	592.742	62.083
Analyzed	CG17762	Tomosyn	31980	y[1] v[1]; P{y[+t7.7] v[+t1.8]=TRiP.JF03414}attP2	905.909	550	-38.2845	0.979281	44.2727	21.3761	342.727	563.182	92.75
Analyzed	CG14821	tow	53704	y[1] v[1]; P{y[+t7.7] v[+t1.8]=TRiP.HMJ21747}attP40	727.778	627.222	-13.5982	0.668442	39.4444	19.3105	182.778	545	45.9167
Analyzed	CG3048	Traf4	55226	y[1] v[1]; P{y[+t7.7] v[+t1.8]=TRiP.GLC01843}attP2	869.375	628.75	-25.9136	0.827704	36.375	24.5419	245.625	623.75	72.667
Analyzed	CG3171	Tre1	27672	y[1] v[1]; P{y[+t7.7] v[+t1.8]=TRiP.JF02751}attP2	948.125	805.938	-14.4476	0.953172	29.25	33.8103	272.5	675.625	80
Analyzed	CG18214	trio	27732	y[1] v[1]; P{y[+t7.7] v[+t1.8]=TRiP.JF02815}attP2	789.231	586.154	-24.9682	1.6583	37.6923	22.1997	225.769	563.462	41.5833
Analyzed	CG44240	Trpm	31291	y[1] v[1]; P{y[+t7.7] v[+t1.8]=TRiP.JF01236}attP2	799.231	586.923	-25.9464	1.10912	37.6923	21.6073	216.154	583.077	79.167
Analyzed	CG11326	Tsp	29399	y[1] v[1]; P{y[+t7.7] v[+t1.8]=TRiP.JF03332}attP2	889.545	655.455	-23.1792	0.912591	35	27.2032	271.364	596.364	55.667
Analyzed	CG4999	Tsp66E	36696	y[1] sc[*] v[1]; P{y[+t7.7] v[+t1.8]=TRiP.HMS01585}attP2/TM3, Sb[1]	909.783	682.826	-24.4123	1.27038	29.1304	32.749	248.043	661.739	45.1667
Analyzed	CG5492	Tsp74F	39046	y[1] sc[*] v[1]; P{y[+t7.7] v[+t1.8]=TRiP.HMS01966}attP40	1008.89	765.556	-22.7207	0.838536	34.5556	30.9512	367.222	641.667	77.833
Analyzed	CG31137	twin	32490	y[1] sc[*] v[1]; P{y[+t7.7] v[+t1.8]=TRiP.HMS00493}attP2	1001.48	810.185	-19.0835	0.910019	35.0741	31.0021	372.407	629.074	86.083
Analyzed	CG9038	UBL3	35745	y[1] sc[*] v[1]; P{y[+t7.7] v[+t1.8]=TRiP.HMS01487}attP2	1082.5	633.125	-41.0628	0.915021	34.625	32.9494	435	647.5	57.792
Analyzed	CG10388	Ubx	31913	y[1] v[1]; P{y[+t7.7] v[+t1.8]=TRiP.JF02202}attP2	881.071	955.357	15.4119	2.23209	38.0714	28.8201	353.571	527.5	40.5
Analyzed	CG32381	unc-13-4A	32033	y[1] v[1]; P{y[+t7.7] v[+t1.8]=TRiP.JF03340}attP2	974.211	707.895	-25.4994	0.94856	39.8421	26.0423	383.421	590.789	60.083
Analyzed	CG8166	unc-5	33756	y[1] sc[*] v[1]; P{y[+t7.7] v[+t1.8]=TRiP.HMS01099}attP2	1090.68	1101.59	2.10601	1.27805	24.3182	51.8352	489.091	601.591	102.042
Analyzed	CG33519	Unc-89	34000	y[1] sc[*] v[1]; P{y[+t7.7] v[+t1.8]=TRiP.HMS00963}attP2	953.571	726.071	-23.0264	0.846862	43	22.7411	359.643	593.929	77.083
Analyzed	CG7015	Unr	29334	y[1] v[1]; P{y[+t7.7] v[+t1.8]=TRiP.JF02496}attP2	1103.33	626.667	-44.5793	1.09259	19.6667	63.2672	423.333	680	69.417
Analyzed	CG2762	ush	32950	y[1] sc[*] v[1]; P{y[+t7.7] v[+t1.8]=TRiP.HMS00744}attP2	1019.88	823.721	-16.7177	0.909851	28.0465	41.2357	360.814	659.07	96.167
Analyzed	CG4827	veil	55195	y[1] sc[*] v[1]; P{y[+t7.7] v[+t1.8]=TRiP.HMC03891}attP40	991.25	756.25	-24.0436	0.790834	32.375	30.7406	324.375	666.875	72.125
Analyzed	CG3830	vg	31970	y[1] v[1]; P{y[+t7.7] v[+t1.8]=TRiP.JF03404}attP2	819.667	545.833	-31.9279	0.889705	40.0667	21.5603	241.5	578.167	46.7083
Analyzed	CG9887	VGlut	27538	y[1] v[1]; P{y[+t7.7] v[+t1.8]=TRiP.JF02689}attP2	956.364	700.455	-28.6505	0.904546	39.3636	27.9323	378.182	578.182	28.75
Analyzed	CG3299	Vinc	25965	y[1] v[1]; P{y[+t7.7] v[+t1.8]=TRiP.JF01985}attP2	893.636	786.818	-10.7315	1.18137	37.1818	25.5729	285.227	608.409	56.583
Analyzed	CG33980	Vsx2	26223	y[1] v[1]; P{y[+t7.7] v[+t1.8]=TRiP.JF02121}attP2	951.429	667.143	-29.7975	1.01218	36.9286	27.0475	358.571	592.857	36.875
Analyzed	CG3707	wapl	36616	y[1] sc[*] v[1]; P{y[+t7.7] v[+t1.8]=TRiP.GL00576}attP2	832.308	787.692	-0.901812	1.25857	40.0513	22.0545	246.154	586.154	72.167
Analyzed	CG4971	Wnt10	31989	y[1] v[1]; P{y[+t7.7] v[+t1.8]=TRiP.JF03423}attP2/TM3, Sb[1]	935	813.182	-12.0325	1.48158	34.5455	27.8599	313.182	621.818	81.333
Analyzed	CG31665	wry	29457	y[1] v[1]; P{y[+t7.7] v[+t1.8]=TRiP.JF03393}attP2/TM3, Sb[1]	962.188	620	-34.9438	0.762405	38.6875	26.4322	365.312	596.875	61.792
Analyzed	CG15897	wuho	61281	y[1] v[1]; P{y[+t7.7] v[+t1.8]=TRiP.HMJ23113}attP40	971.818	696.364	-28.2397	0.869862	29.8182	38.6928	312.273	659.545	96.167
Analyzed	CG10203	x16	51468	y[1] v[1]; P{y[+t7.7] v[+t1.8]=TRiP.HMC03209}attP2	925.909	680.455	-24.4085	0.778063	32.0909	29.4504	278.636	647.273	89.583
Analyzed	CG30084	Zasp52	31561	y[1] v[1]; P{y[+t7.7] v[+t1.8]=TRiP.JF01133}attP2	870.417	790	-8.81372	1.20166	41.6667	21.8781	253.75	616.667	65.667
Analyzed	CG11376	Zir	28005	y[1] v[1]; P{y[+t7.7] v[+t1.8]=TRiP.JF02839}attP2	872.333	765.333	-10.5799	1.18384	43.8667	20.983	293.333	593.667	65.25
Analyzed	CG31860	ZnT33D	38312	y[1] sc[*] v[1]; P{y[+t7.7] v[+t1.8]=TRiP.HMS01776}attP40	910.625	712.812	-21.6994	0.926089	32.4375	29.993	269.688	640.938	61.25
Analyzed	CG33484	zormin	34039	y[1] sc[*] v[1]; P{y[+t7.7] v[+t1.8]=TRiP.HMS01014}attP2/TM3, Sb[1]	888.333	800.417	-9.05349	0.924484	34.4167	26.8296	280.833	607.5	74.958
Analyzed	CG5237	unc79	51471	y[1] sc[*] v[1]; P{y[+t7.7] v[+t1.8]=TRiP.HMC03213}attP2	1083.46	1161.54	9.40113	1.88863	29.1538	44.9553	546.538	536.923	122.917
Lethal	CG2139	aralar1	56884	y[1] sc[*] v[1]; P{y[+t7.7] v[+t1.8]=TRiP.HMC04105}attP40
Lethal	CG15138	beat-IIIc	29607	y[1] v[1]; P{y[+t7.7] v[+t1.8]=TRiP.JF03286}attP2
Lethal	CG4722	bib	27691	y[1] v[1]; P{y[+t7.7] v[+t1.8]=TRiP.JF02771}attP2
Lethal	CG44425	Bx	29454	y[1] v[1]; P{y[+t7.7] v[+t1.8]=TRiP.JF03390}attP2
Lethal	CG5685	Calx	28306	y[1] v[1]; P{y[+t7.7] v[+t1.8]=TRiP.JF02937}attP2
Lethal	CG11617	CG11617	42525	y[1] v[1]; P{y[+t7.7] v[+t1.8]=TRiP.HMJ02091}attP40
Lethal	CG13784	CG13784	28058	y[1] v[1]; P{y[+t7.7] v[+t1.8]=TRiP.JF02894}attP2
Lethal	CG14760	CG14760	53366	y[1] sc[*] v[1]; P{y[+t7.7] v[+t1.8]=TRiP.HMC03595}attP40									45.2083
Lethal	CG15279	CG15279	50583	y[1] v[1]; P{y[+t7.7] v[+t1.8]=TRiP.GLC01705}attP2
Lethal	CG3036	CG3036	43179	y[1] v[1]; P{y[+t7.7] v[+t1.8]=TRiP.GL01522}attP2
Lethal	CG31413	CG31413	60431	y[1] v[1]; P{y[+t7.7] v[+t1.8]=TRiP.HMJ22722}attP40
Lethal	CG34367	CG34367	57455	y[1] sc[*] v[1]; P{y[+t7.7] v[+t1.8]=TRiP.HMC04763}attP40
Lethal	CG3726	CG3726	57273	y[1] sc[*] v[1]; P{y[+t7.7] v[+t1.8]=TRiP.HMC04668}attP40
Lethal	CG4119	CG4119	55668	y[1] sc[*] v[1]; P{y[+t7.7] v[+t1.8]=TRiP.HMC03823}attP40
Lethal	CG42445	CG42445	42760	y[1] sc[*] v[1]; P{y[+t7.7] v[+t1.8]=TRiP.GL00715}attP2
Lethal	CG42663	CG42663	54808	y[1] v[1]; P{y[+t7.7] v[+t1.8]=TRiP.HMJ21502}attP40
Lethal	CG42671	CG42671	36844	y[1] sc[*] v[1]; P{y[+t7.7] v[+t1.8]=TRiP.GL01098}attP2
Lethal	CG42708	CG42708	62216	y[1] sc[*] v[1]; P{y[+t7.7] v[+t1.8]=TRiP.HMC05223}attP40
Lethal	CG42788	CG42788	31556	y[1] v[1]; P{y[+t7.7] v[+t1.8]=TRiP.JF01124}attP2
Lethal	CG43066	CG43066	28069	y[1] v[1]; P{y[+t7.7] v[+t1.8]=TRiP.JF02906}attP2
Lethal	CG43693	CG43693	60341	y[1] v[1]; P{y[+t7.7] v[+t1.8]=TRiP.HMJ22481}attP40
Lethal	CG4991	CG4991	44450	y[1] v[1]; P{y[+t7.7] v[+t1.8]=TRiP.GLC01599}attP2
Lethal	CG3619	Dl	28032	y[1] v[1]; P{y[+t7.7] v[+t1.8]=TRiP.JF02867}attP2
Lethal	CG5737	dmrt93B	50656	y[1] v[1]; P{y[+t7.7] v[+t1.8]=TRiP.HMC03057}attP2
Lethal	CG32498	dnc	27250	y[1] v[1]; P{y[+t7.7] v[+t1.8]=TRiP.JF02561}attP2
Lethal	CG9885	dpp	25782	y[1] v[1]; P{y[+t7.7] v[+t1.8]=TRiP.JF01371}attP2
Lethal	CG32159	dsx-c73A	53964	y[1] v[1]; P{y[+t7.7] v[+t1.8]=TRiP.HMJ21346}attP40
Lethal	CG6376	E2f	27564	y[1] v[1]; P{y[+t7.7] v[+t1.8]=TRiP.JF02718}attP2
Lethal	CG10952	eag	31678	y[1] v[1]; P{y[+t7.7] v[+t1.8]=TRiP.JF01471}attP2
Lethal	CG43119	Ect4	31175	y[1] v[1]; P{y[+t7.7] v[+t1.8]=TRiP.JF01681}attP2
Lethal	CG8023	eIF4E-3	42804	y[1] v[1]; P{y[+t7.7] v[+t1.8]=TRiP.GL01177}attP2
Lethal	CG42864	f	41687	y[1] sc[*] v[1]; P{y[+t7.7] v[+t1.8]=TRiP.HMS02251}attP2
Lethal	CG3665	Fas2	28990	y[1] v[1]; P{y[+t7.7] v[+t1.8]=TRiP.JF02918}attP2 e[*]
Lethal	CG42610	Fhos	31400	y[1] v[1]; P{y[+t7.7] v[+t1.8]=TRiP.JF01606}attP2
Lethal	CG10033	for	31592	y[1] v[1]; P{y[+t7.7] v[+t1.8]=TRiP.JF01181}attP2
Lethal	CG9526	frj	43169	y[1] v[1]; P{y[+t7.7] v[+t1.8]=TRiP.GL01511}attP2
Lethal	CG42739	gce	26323	y[1] v[1]; P{y[+t7.7] v[+t1.8]=TRiP.JF02097}attP2
Lethal	CG4451	Hs6st	64018	y[1] sc[*] v[1]; P{y[+t7.7] v[+t1.8]=TRiP.HMS05354}attP40
Lethal	CG5576	imd	38933	y[1] sc[*] v[1]; P{y[+t7.7] v[+t1.8]=TRiP.HMS00253}attP2/TM3, Sb[1]
Lethal	CG18402	InR	31037	y[1] v[1]; P{y[+t7.7] v[+t1.8]=TRiP.JF01482}attP2
Lethal	CG42551	larp	41835	y[1] v[1]; P{y[+t7.7] v[+t1.8]=TRiP.GL01263}attP2/TM3, Sb[1]
Lethal	CG43227	milt	28385	y[1] v[1]; P{y[+t7.7] v[+t1.8]=TRiP.JF03022}attP2
Lethal	CG4123	Mipp1	57320	y[1] sc[*] v[1]; P{y[+t7.7] v[+t1.8]=TRiP.HMS04521}attP40
Lethal	CG13772	Nlg2	58128	y[1] v[1]; P{y[+t7.7] v[+t1.8]=TRiP.HMJ22077}attP40
Lethal	CG11430	olf186-F	53333	y[1] sc[*] v[1]; P{y[+t7.7] v[+t1.8]=TRiP.HMC03562}attP40
Lethal	CG6331	Orct	60125	y[1] sc[*] v[1]; P{y[+t7.7] v[+t1.8]=TRiP.HMC05119}attP40
Lethal	CG42698	pdm3	26749	y[1] v[1]; P{y[+t7.7] v[+t1.8]=TRiP.JF02312}attP2
Lethal	CG5547	Pect	63710	y[1] v[1]; P{y[+t7.7] v[+t1.8]=TRiP.HMJ30278}attP40
Lethal	CG11516	Ptp99A	25840	y[1] v[1]; P{y[+t7.7] v[+t1.8]=TRiP.JF01858}attP2
Lethal	CG1228	Ptpmeg	39007	y[1] sc[*] v[1]; P{y[+t7.7] v[+t1.8]=TRiP.HMS01924}attP2
Lethal	CG14791	Rab27	50537	y[1] v[1]; P{y[+t7.7] v[+t1.8]=TRiP.GLC01655}attP40
Lethal	CG5915	Rab7	27051	y[1] v[1]; P{y[+t7.7] v[+t1.8]=TRiP.JF02377}attP2
Lethal	CG45090	SclA	28957	y[1] v[1]; P{y[+t7.7] v[+t1.8]=TRiP.HM05168}attP2
Lethal	CG45091	SclB	28957	y[1] v[1]; P{y[+t7.7] v[+t1.8]=TRiP.HM05168}attP2
Lethal	CG8544	sd	29352	y[1] v[1]; P{y[+t7.7] v[+t1.8]=TRiP.JF02514}attP2
Lethal	CG32423	shep	38218	y[1] v[1]; P{y[+t7.7] v[+t1.8]=TRiP.GL00659}attP40
Lethal	CG45051	sima	26207	y[1] v[1]; P{y[+t7.7] v[+t1.8]=TRiP.JF02105}attP2
Lethal	CG10706	SK	27238	y[1] v[1]; P{y[+t7.7] v[+t1.8]=TRiP.JF02571}attP2
Lethal	CG3139	Syt1	31289	y[1] v[1]; P{y[+t7.7] v[+t1.8]=TRiP.JF01234}attP2
Lethal	CG3905	Su(z)2	31335	y[1] v[1]; P{y[+t7.7] v[+t1.8]=TRiP.JF01293}attP2
Lethal	CG17299	SNF4Agamma	26291	y[1] v[1]; P{y[+t7.7] v[+t1.8]=TRiP.JF02060}attP2
Lethal	CG15105	tn	31588	y[1] v[1]; P{y[+t7.7] v[+t1.8]=TRiP.JF01164}attP2
Lethal	CG33261	Trl	41582	y[1] v[1]; P{y[+t7.7] v[+t1.8]=TRiP.GL00699}attP2
Lethal	CG1322	zfh1	38929	y[1] sc[*] v[1]; P{y[+t7.7] v[+t1.8]=TRiP.GL01066}attP2
Lethal	CG8108	CG8108	27562	y[1] v[1]; P{y[+t7.7] v[+t1.8]=TRiP.JF02716}attP2
Lethal	CG9305	CG9305	60098	y[1] sc[*] v[1]; P{y[+t7.7] v[+t1.8]=TRiP.HMC05092}attP40
Lethal	CG4376	Actn	34874	y[1] sc[*] v[1]; P{y[+t7.7] v[+t1.8]=TRiP.HMS00193}attP2
Lethal	CG17273	AdSS	33993	y[1] sc[*] v[1]; P{y[+t7.7] v[+t1.8]=TRiP.HMS00956}attP2
Lethal	CG11325	AkhR	29577	y[1] v[1]; P{y[+t7.7] v[+t1.8]=TRiP.JF03256}attP2
Lethal	CG3166	aop	34909	y[1] sc[*] v[1]; P{y[+t7.7] v[+t1.8]=TRiP.HMS01256}attP2
Lethal	CG9113	AP-1gamma	27533	y[1] v[1]; P{y[+t7.7] v[+t1.8]=TRiP.JF02684}attP2
Lethal	CG42783	aPKC	25946	y[1] v[1]; P{y[+t7.7] v[+t1.8]=TRiP.JF01966}attP2
Lethal	CG11405	Atf3	26741	y[1] v[1]; P{y[+t7.7] v[+t1.8]=TRiP.JF02303}attP2
Lethal	CG10967	Atg1	26731	y[1] v[1]; P{y[+t7.7] v[+t1.8]=TRiP.JF02273}attP2
Lethal	CG5670	Atpalpha	28073	y[1] v[1]; P{y[+t7.7] v[+t1.8]=TRiP.JF02910}attP2
Lethal	CG9097	bab1	57410	y[1] sc[*] v[1]; P{y[+t7.7] v[+t1.8]=TRiP.HMC04716}attP40
Lethal	CG3971	Baldspot	44101	y[1] v[1]; P{y[+t7.7] v[+t1.8]=TRiP.HMS02821}attP40
Lethal	CG10152	beat-IV	56981	y[1] sc[*] v[1]; P{y[+t7.7] v[+t1.8]=TRiP.HMC04421}attP40
Lethal	CG4608	bnl	34572	y[1] sc[*] v[1]; P{y[+t7.7] v[+t1.8]=TRiP.HMS01046}attP2
Lethal	CG5206	bon	27047	y[1] v[1]; P{y[+t7.7] v[+t1.8]=TRiP.JF02373}attP2
Lethal	CG43365	BtbVII	28912	y[1] v[1]; P{y[+t7.7] v[+t1.8]=TRiP.HM05123}attP2
Lethal	CG8049	Btk29A	25791	y[1] v[1]; P{y[+t7.7] v[+t1.8]=TRiP.JF01797}attP2
Lethal	CG15148	btv	28373	y[1] v[1]; P{y[+t7.7] v[+t1.8]=TRiP.JF03010}attP2
Lethal	CR31273	bxd	57550	y[1] sc[*] v[1]; P{y[+t7.7] v[+t1.8]=TRiP.HMC04867}attP40
Lethal	CG5848	cact	34775	y[1] sc[*] v[1]; P{y[+t7.7] v[+t1.8]=TRiP.HMS00084}attP2
Lethal	CG7100	CadN	27503	y[1] v[1]; P{y[+t7.7] v[+t1.8]=TRiP.JF02653}attP2
Lethal	CG5148	cal1	41716	y[1] sc[*] v[1]; P{y[+t7.7] v[+t1.8]=TRiP.HMS02281}attP2/TM3, Sb[1]
Lethal	CG33979	capt	33010	y[1] sc[*] v[1]; P{y[+t7.7] v[+t1.8]=TRiP.HMS00810}attP2
Lethal	CG8400	casp	44027	y[1] sc[*] v[1]; P{y[+t7.7] v[+t1.8]=TRiP.HMS02742}attP2
Lethal	CG42630	Ccdc56	58180	y[1] v[1]; P{y[+t7.7] v[+t1.8]=TRiP.HMJ22157}attP40
Lethal	CG32183	Ccn	31715	y[1] v[1]; P{y[+t7.7] v[+t1.8]=TRiP.HM04023}attP2
Lethal	CG5971	Cdc6	55734	y[1] sc[*] v[1]; P{y[+t7.7] v[+t1.8]=TRiP.HMC03802}attP40
Lethal	CG8367	cg	34668	y[1] sc[*] v[1]; P{y[+t7.7] v[+t1.8]=TRiP.HMS01145}attP2
Lethal	CG10348	CG10348	27076	y[1] v[1]; P{y[+t7.7] v[+t1.8]=TRiP.JF02421}attP2/TM3, Sb[1]
Lethal	CG11030	CG11030	57711	y[1] sc[*] v[1]; P{y[+t7.7] v[+t1.8]=TRiP.HMC04900}attP2
Lethal	CG11050	CG11050	52970	y[1] v[1]; P{y[+t7.7] v[+t1.8]=TRiP.HMJ21655}attP40
Lethal	CG11221	CG11221	29603	y[1] v[1]; P{y[+t7.7] v[+t1.8]=TRiP.JF03282}attP2
Lethal	CG11317	CG11317	28065	y[1] v[1]; P{y[+t7.7] v[+t1.8]=TRiP.JF02902}attP2
Lethal	CG11409	CG11409	61223	y[1] v[1]; P{y[+t7.7] v[+t1.8]=TRiP.HMJ23002}attP40
Lethal	CG11455	CG11455	55180	y[1] sc[*] v[1]; P{y[+t7.7] v[+t1.8]=TRiP.HMC03861}attP40
Lethal	CG11920	CG11920	34860	y[1] sc[*] v[1]; P{y[+t7.7] v[+t1.8]=TRiP.HMS00178}attP2
Lethal	CG11966	CG11966	44046	y[1] sc[*] v[1]; P{y[+t7.7] v[+t1.8]=TRiP.HMS02762}attP2
Lethal	CG12075	CG12075	42952	y[1] sc[*] v[1]; P{y[+t7.7] v[+t1.8]=TRiP.HMS02645}attP40
Lethal	CG12090	CG12090	57492	y[1] sc[*] v[1]; P{y[+t7.7] v[+t1.8]=TRiP.HMC04806}attP40
Lethal	CG13188	CG13188	35032	y[1] sc[*] v[1]; P{y[+t7.7] v[+t1.8]=TRiP.HMS01445}attP2
Lethal	CG13676	CG13676	38376	y[1] v[1]; P{y[+t7.7] v[+t1.8]=TRiP.HMS01845}attP40
Lethal	CG13917	CG13917	42903	y[1] sc[*] v[1]; P{y[+t7.7] v[+t1.8]=TRiP.HMS02596}attP40
Lethal	CG14073	CG14073	61868	y[1] v[1]; P{y[+t7.7] v[+t1.8]=TRiP.HMJ23357}attP40/CyO
Lethal	CG14424	CG14424	58131	y[1] sc[*] v[1]; P{y[+t7.7] v[+t1.8]=TRiP.HMS02396}attP40
Lethal	CG14945	CG14945	32384	y[1] sc[*] v[1]; P{y[+t7.7] v[+t1.8]=TRiP.HMS00376}attP2
Lethal	CG15537	CG15537	28767	y[1] v[1]; P{y[+t7.7] v[+t1.8]=TRiP.JF03195}attP2
Lethal	CG15771	CG15771	57214	y[1] sc[*] v[1]; P{y[+t7.7] v[+t1.8]=TRiP.HMC04597}attP40
Lethal	CG1677	CG1677	55355	y[1] sc[*] v[1]; P{y[+t7.7] v[+t1.8]=TRiP.HMC04042}attP40
Lethal	CG16812	CG16812	60434	y[1] v[1]; P{y[+t7.7] v[+t1.8]=TRiP.HMJ22747}attP40
Lethal	CG16825	CG16825	53973	y[1] v[1]; P{y[+t7.7] v[+t1.8]=TRiP.HMJ21358}attP40
Lethal	CG17321	CG17321	29618	y[1] v[1]; P{y[+t7.7] v[+t1.8]=TRiP.JF03297}attP2
Lethal	CG17646	CG17646	26008	y[1] v[1]; P{y[+t7.7] v[+t1.8]=TRiP.JF02033}attP2
Lethal	CG1887	CG1887	55401	y[1] v[1]; P{y[+t7.7] v[+t1.8]=TRiP.HMC04089}attP2
Lethal	CG3077	CG3077	63610	y[1] v[1]; P{y[+t7.7] v[+t1.8]=TRiP.HMJ30177}attP40
Lethal	CG31195	CG31195	42632	y[1] sc[*] v[1]; P{y[+t7.7] v[+t1.8]=TRiP.HMS02468}attP40
Lethal	CG3164	CG3164	44629	y[1] sc[*] v[1]; P{y[+t7.7] v[+t1.8]=TRiP.GLC01374}attP2
Lethal	CG3168	CG3168	29301	y[1] v[1]; P{y[+t7.7] v[+t1.8]=TRiP.JF02441}attP2
Lethal	CG31710	CG31710	60882	y[1] v[1]; P{y[+t7.7] v[+t1.8]=TRiP.HMJ22650}attP40
Lethal	CG31728	CG31728	55628	y[1] sc[*] v[1]; P{y[+t7.7] v[+t1.8]=TRiP.HMC03773}attP40
Lethal	CG31729	CG31729	51819	y[1] sc[*] v[1]; P{y[+t7.7] v[+t1.8]=TRiP.HMC03390}attP2
Lethal	CG32091	CG32091	57783	y[1] sc[*] v[1]; P{y[+t7.7] v[+t1.8]=TRiP.HMC04977}attP40
Lethal	CG32364	CG32364	36752	y[1] sc[*] v[1]; P{y[+t7.7] v[+t1.8]=TRiP.HMS03012}attP2
Lethal	CG32506	CG32506	28776	y[1] v[1]; P{y[+t7.7] v[+t1.8]=TRiP.JF03204}attP2
Lethal	CG32791	CG32791	38965	y[1] v[1]; P{y[+t7.7] v[+t1.8]=TRiP.HMS01879}attP40/CyO
Lethal	CG33144	CG33144	64033	y[1] sc[*] v[1]; P{y[+t7.7] v[+t1.8]=TRiP.HMS05369}attP40
Lethal	CG3355	CG3355	52897	y[1] sc[*] v[1]; P{y[+t7.7] v[+t1.8]=TRiP.HMC03636}attP40
Lethal	CG3430	CG3430	42810	y[1] v[1]; P{y[+t7.7] v[+t1.8]=TRiP.GL01184}attP2/TM3, Sb[1]
Lethal	CG34371	CG34371	61953	y[1] v[1]; P{y[+t7.7] v[+t1.8]=TRiP.HMJ23537}attP40
Lethal	CG3609	CG3609	62274	y[1] sc[*] v[1]; P{y[+t7.7] v[+t1.8]=TRiP.HMC05281}attP40
Lethal	CG3632	CG3632	38341	y[1] sc[*] v[1]; P{y[+t7.7] v[+t1.8]=TRiP.HMS01808}attP2
Lethal	CG42368	CG42368	38936	y[1] sc[*] v[1]; P{y[+t7.7] v[+t1.8]=TRiP.HMS01718}attP40
Lethal	CG42699	CG42699	34591	y[1] sc[*] v[1]; P{y[+t7.7] v[+t1.8]=TRiP.HMS01065}attP2
Lethal	CG43078	CG43078	62403	y[1] v[1]; P{y[+t7.7] v[+t1.8]=TRiP.HMJ23826}attP40/CyO
Lethal	CG43163	CG43163	50958	y[1] v[1]; P{y[+t7.7] v[+t1.8]=TRiP.HMJ21060}attP40/CyO
Lethal	CG43313	CG43313	53990	y[1] v[1]; P{y[+t7.7] v[+t1.8]=TRiP.HMJ21394}attP40
Lethal	CG43444	CG43444	62280	y[1] sc[*] v[1]; P{y[+t7.7] v[+t1.8]=TRiP.HMC05287}attP40
Lethal	CG4374	CG4374	57775	y[1] sc[*] v[1]; P{y[+t7.7] v[+t1.8]=TRiP.HMC04969}attP40
Lethal	CG4629	CG4629	27310	y[1] v[1]; P{y[+t7.7] v[+t1.8]=TRiP.JF02618}attP2
Lethal	CG4766	CG4766	50605	y[1] v[1]; P{y[+t7.7] v[+t1.8]=TRiP.HMC02404}attP2
Lethal	CG5322	CG5322	44473	y[1] v[1]; P{y[+t7.7] v[+t1.8]=TRiP.HMC02357}attP2
Lethal	CG6118	CG6118	62843	y[1] sc[*] v[1]; P{y[+t7.7] v[+t1.8]=TRiP.HMC05316}attP40
Lethal	CG6231	CG6231	63013	y[1] v[1]; P{y[+t7.7] v[+t1.8]=TRiP.HMJ30090}attP40
Lethal	CG6767	CG6767	35619	y[1] sc[*] v[1]; P{y[+t7.7] v[+t1.8]=TRiP.GL00463}attP2/TM3, Sb[1]
Lethal	CG7028	CG7028	35285	y[1] sc[*] v[1]; P{y[+t7.7] v[+t1.8]=TRiP.GL00186}attP2
Lethal	CG7185	CG7185	34804	y[1] sc[*] v[1]; P{y[+t7.7] v[+t1.8]=TRiP.HMS00113}attP2
Lethal	CG9667	CG9667	31758	y[1] v[1]; P{y[+t7.7] v[+t1.8]=TRiP.HM04069}attP2
Lethal	CG9850	CG9850	50564	y[1] sc[*] v[1]; P{y[+t7.7] v[+t1.8]=TRiP.GLC01684}attP2
Lethal	CG9902	CG9902	61817	y[1] v[1]; P{y[+t7.7] v[+t1.8]=TRiP.HMJ23260}attP40
Lethal	CG5686	chico	28329	y1 v1; P{TRiP.JF02964}attP2
Lethal	CG11798	chn	26779	y[1] v[1]; P{y[+t7.7] v[+t1.8]=TRiP.JF02343}attP2/TM3, Sb[1]
Lethal	CG12797	Ciao1	60113	y[1] sc[*] v[1]; P{y[+t7.7] v[+t1.8]=TRiP.HMC05107}attP2
Lethal	CG43395	Cngl	28684	y[1] v[1]; P{y[+t7.7] v[+t1.8]=TRiP.JF03099}attP2
Lethal	CG4832	cnn	31402	y[1] v[1]; P{y[+t7.7] v[+t1.8]=TRiP.JF01769}attP2
Lethal	CG11949	cora	51845	y[1] v[1]; P{y[+t7.7] v[+t1.8]=TRiP.HMC03418}attP40
Lethal	CG6998	ctp	42862	y[1] sc[*] v[1]; P{y[+t7.7] v[+t1.8]=TRiP.HMS02554}attP40
Lethal	CG45070	CTPsyn	31752	y[1] v[1]; P{y[+t7.7] v[+t1.8]=TRiP.HM04062}attP2
Lethal	CG7055	dalao	26218	y[1] v[1]; P{y[+t7.7] v[+t1.8]=TRiP.JF02116}attP2
Lethal	CG4974	dally	28754	y[1] v[1]; P{y[+t7.7] v[+t1.8]=TRiP.JF03182}attP2
Lethal	CG7507	Dhc64C	28749	y[1] v[1]; P{y[+t7.7] v[+t1.8]=TRiP.JF03177}attP2
Lethal	CG42799	dikar	58280	y[1] v[1]; P{y[+t7.7] v[+t1.8]=TRiP.HMJ22365}attP40
Lethal	CG6768	DNApol-epsilon	51775	y[1] v[1]; P{y[+t7.7] v[+t1.8]=TRiP.HMC03330}attP40
Lethal	CG42320	Doa	50903	y[1] v[1]; P{y[+t7.7] v[+t1.8]=TRiP.HMJ03121}attP40
Lethal	CG33196	dpy	31966	y[1] v[1]; P{y[+t7.7] v[+t1.8]=TRiP.JF03166}attP2
Lethal	CG17941	ds	28008	y[1] v[1]; P{y[+t7.7] v[+t1.8]=TRiP.JF02842}attP2
Lethal	CG17800	Dscam1	29628	y[1] v[1]; P{y[+t7.7] v[+t1.8]=TRiP.JF03307}attP2
Lethal	CG6502	E(z)	27993	y[1] v[1]; P{y[+t7.7] v[+t1.8]=TRiP.JF02826}attP2
Lethal	CG18389	Eip93F	57868	y[1] sc[*] v[1]; P{y[+t7.7] v[+t1.8]=TRiP.HMC04773}attP40
Lethal	CG6755	EloA	37017	y[1] sc[*] v[1]; P{y[+t7.7] v[+t1.8]=TRiP.HMS01255}attP2
Lethal	CG11290	enok	29518	y[1] v[1]; P{y[+t7.7] v[+t1.8]=TRiP.HM05195}attP2/TM3, Sb[1]
Lethal	CG2914	Ets21C	39069	y[1] sc[*] v[1]; P{y[+t7.7] v[+t1.8]=TRiP.HMS01989}attP2
Lethal	CG8254	exex	57709	y[1] sc[*] v[1]; P{y[+t7.7] v[+t1.8]=TRiP.HMC04898}attP2
Lethal	CG6817	foi	55281	y[1] sc[*] v[1]; P{y[+t7.7] v[+t1.8]=TRiP.HMC03968}attP40
Lethal	CG8581	fra	31469	y[1] v[1]; P{y[+t7.7] v[+t1.8]=TRiP.JF01231}attP2
Lethal	CG18734	Fur2	42577	y[1] v[1]; P{y[+t7.7] v[+t1.8]=TRiP.HMJ02236}attP40
Lethal	CG8205	fus	55921	y[1] sc[*] v[1]; P{y[+t7.7] v[+t1.8]=TRiP.HMC04208}attP40
Lethal	CG12030	Gale	44496	y[1] sc[*] v[1]; P{y[+t7.7] v[+t1.8]=TRiP.HMC02429}attP2
Lethal	CG17759	Galphaq	33765	y[1] v[1]; P{y[+t7.7] v[+t1.8]=TRiP.JF02464}attP2
Lethal	CG7535	GluClalpha	53356	y[1] sc[*] v[1]; P{y[+t7.7] v[+t1.8]=TRiP.HMC03585}attP40
Lethal	CG43743	GluRIB	27673	y[1] v[1]; P{y[+t7.7] v[+t1.8]=TRiP.JF02752}attP2
Lethal	CG7254	GlyP	33634	y[1] v[1]; P{y[+t7.7] v[+t1.8]=TRiP.HMS00032}attP2
Lethal	CG42311	grh	28820	y[1] v[1]; P{y[+t7.7] v[+t1.8]=TRiP.JF02305}attP2
Lethal	CG2851	Gsc	50894	y[1] sc[*] v[1]; P{y[+t7.7] v[+t1.8]=TRiP.HMC02397}attP2
Lethal	CG6964	Gug	32961	y[1] sc[*] v[1]; P{y[+t7.7] v[+t1.8]=TRiP.HMS00756}attP2
Lethal	CG15532	hdc	30489	y[1] sc[*] v[1]; P{y[+t7.7] v[+t1.8]=TRiP.HM05231}attP2
Lethal	CG13475	HGTX	29382	y[1] v[1]; P{y[+t7.7] v[+t1.8]=TRiP.JF03314}attP2/TM3, Sb[1]
Lethal	CG10367	Hmgcr	50652	y[1] v[1]; P{y[+t7.7] v[+t1.8]=TRiP.HMC03053}attP40
Lethal	CG12787	hoe1	31719	y[1] v[1]; P{y[+t7.7] v[+t1.8]=TRiP.HM04027}attP2
Lethal	CG1594	hop	32966	y[1] sc[*] v[1]; P{y[+t7.7] v[+t1.8]=TRiP.HMS00761}attP2
Lethal	CG43934	Hr4	31868	y[1] sc[*] v[1]; P{y[+t7.7] v[+t1.8]=TRiP.HM05260}attP2
Lethal	CG10574	I-2	44050	y[1] sc[*] v[1]; P{y[+t7.7] v[+t1.8]=TRiP.HMS02767}attP40
Lethal	CG3125	IntS6	52904	y[1] sc[*] v[1]; P{y[+t7.7] v[+t1.8]=TRiP.HMC03644}attP40
Lethal	CG42351	Jabba	36852	y[1] sc[*] v[1]; P{y[+t7.7] v[+t1.8]=TRiP.GL01111}attP2
Lethal	CG30040	jeb	56022	y[1] sc[*] v[1]; P{y[+t7.7] v[+t1.8]=TRiP.HMC04318}attP40
Lethal	CG12317	JhI-21	41706	y[1] sc[*] v[1]; P{y[+t7.7] v[+t1.8]=TRiP.HMS02271}attP40
Lethal	CG10275	kon	31584	y[1] v[1]; P{y[+t7.7] v[+t1.8]=TRiP.JF01159}attP2
Lethal	CG10691	l(2)37Cc	32912	y[1] sc[*] v[1]; P{y[+t7.7] v[+t1.8]=TRiP.HMS00702}attP2
Lethal	CG7942	ldbr	55661	y[1] sc[*] v[1]; P{y[+t7.7] v[+t1.8]=TRiP.HMC03816}attP40
Lethal	CG4589	Letm1	37502	y[1] sc[*] v[1]; P{y[+t7.7] v[+t1.8]=TRiP.HMS01644}attP40
Lethal	CG6206	LM408	53294	y[1] v[1]; P{y[+t7.7] v[+t1.8]=TRiP.HMC03510}attP40
Lethal	CG12399	Mad	31315	y[1] v[1]; P{y[+t7.7] v[+t1.8]=TRiP.JF01263}attP2
Lethal	CG33106	mask	31574	y[1] v[1]; P{y[+t7.7] v[+t1.8]=TRiP.JF01147}attP2
Lethal	CG10379	mbc	32355	y[1] sc[*] v[1]; P{y[+t7.7] v[+t1.8]=TRiP.HMS00346}attP2
Lethal	CG32156	Mbs	41625	y[1] v[1]; P{y[+t7.7] v[+t1.8]=TRiP.GL01207}attP40
Lethal	CG1771	mew	44553	y[1] sc[*] v[1]; P{y[+t7.7] v[+t1.8]=TRiP.HMS02849}attP2
Lethal	CG17927	Mhc	26299	y[1] v[1]; P{y[+t7.7] v[+t1.8]=TRiP.JF02069}attP2
Lethal	CG34100	mld	31952	y[1] v[1]; P{y[+t7.7] v[+t1.8]=TRiP.JF02244}attP2
Lethal	CG10701	Moe	31135	y[1] v[1]; P{y[+t7.7] v[+t1.8]=TRiP.JF01610}attP2
Lethal	CG16973	msn	28791	y[1] v[1]; P{y[+t7.7] v[+t1.8]=TRiP.JF03219}attP2
Lethal	CG4644	mtRNApol	35732	y[1] sc[*] v[1]; P{y[+t7.7] v[+t1.8]=TRiP.HMS01474}attP2
Lethal	CG6896	MYPT-75D	34688	y[1] sc[*] v[1]; P{y[+t7.7] v[+t1.8]=TRiP.HMS01166}attP2
Lethal	CG42253	Ndae1	62177	y[1] sc[*] v[1]; P{y[+t7.7] v[+t1.8]=TRiP.HMC05184}attP40
Lethal	CG13906	nerfin-1	28324	y[1] v[1]; P{y[+t7.7] v[+t1.8]=TRiP.JF02956}attP2
Lethal	CG7436	Nmt	62397	y[1] v[1]; P{y[+t7.7] v[+t1.8]=TRiP.HMJ23820}attP40/CyO
Lethal	CG4211	nonA	61279	y[1] v[1]; P{y[+t7.7] v[+t1.8]=TRiP.HMJ23111}attP40
Lethal	CG1634	Nrg	37496	y[1] sc[*] v[1]; P{y[+t7.7] v[+t1.8]=TRiP.HMS01638}attP40
Lethal	CG42576	NT1	53003	y[1] v[1]; P{y[+t7.7] v[+t1.8]=TRiP.HMJ21720}attP40
Lethal	CG43479	nwk	27713	y[1] v[1]; P{y[+t7.7] v[+t1.8]=TRiP.JF02793}attP2
Lethal	CG42702	Oaz	25923	y[1] v[1]; P{y[+t7.7] v[+t1.8]=TRiP.JF01943}attP2
Lethal	CG42244	Octbeta3R	62283	y[1] v[1]; P{y[+t7.7] v[+t1.8]=TRiP.HMJ23640}attP40
Lethal	CG8201	par-1	32410	y[1] sc[*] v[1]; P{y[+t7.7] v[+t1.8]=TRiP.HMS00405}attP2
Lethal	CG9907	para	31471	y[1] v[1]; P{y[+t7.7] v[+t1.8]=TRiP.JF01245}attP2/TM3, Sb[1]
Lethal	CG5208	Patr-1	34667	y[1] sc[*] v[1]; P{y[+t7.7] v[+t1.8]=TRiP.HMS01144}attP2/TM3, Sb[1]
Lethal	CG33130	Patronin	36659	y[1] sc[*] v[1]; P{y[+t7.7] v[+t1.8]=TRiP.HMS01547}attP2
Lethal	CG8114	pbl	28343	y[1] v[1]; P{y[+t7.7] v[+t1.8]=TRiP.JF02979}attP2
Lethal	CG44007	Pde1c	55925	y[1] sc[*] v[1]; P{y[+t7.7] v[+t1.8]=TRiP.HMC04212}attP40
Lethal	CG2845	phl	55679	y[1] sc[*] v[1]; P{y[+t7.7] v[+t1.8]=TRiP.HMC03854}attP2
Lethal	CG10108	phyl	29433	y[1] v[1]; P{y[+t7.7] v[+t1.8]=TRiP.JF03369}attP2
Lethal	CG10260	PI4KIIIalpha	38242	y[1] sc[*] v[1]; P{y[+t7.7] v[+t1.8]=TRiP.HMS01686}attP40
Lethal	CG3324	Pkg21D	62991	y[1] v[1]; P{y[+t7.7] v[+t1.8]=TRiP.HMJ30068}attP40
Lethal	CG17077	pnt	31936	y[1] v[1]; P{y[+t7.7] v[+t1.8]=TRiP.JF02227}attP2
Lethal	CG5939	Prm	31549	y[1] v[1]; P{y[+t7.7] v[+t1.8]=TRiP.JF01111}attP2
Lethal	CG17228	pros	42538	y1 v1; P{TRiP.HMJ02107}attP40
Lethal	CG5519	Prp19	32865	y[1] sc[*] v[1]; P{y[+t7.7] v[+t1.8]=TRiP.HMS00652}attP2
Lethal	CG6899	Ptp4E	38369	y[1] sc[*] v[1]; P{y[+t7.7] v[+t1.8]=TRiP.HMS01838}attP2
Lethal	CG8222	Pvr	37520	y[1] sc[*] v[1]; P{y[+t7.7] v[+t1.8]=TRiP.HMS01662}attP40
Lethal	CG7660	Pxt	28934	y[1] v[1]; P{y[+t7.7] v[+t1.8]=TRiP.HM05145}attP2
Lethal	CG18572	r	42828	y[1] sc[*] v[1]; P{y[+t7.7] v[+t1.8]=TRiP.HMS02510}attP2
Lethal	CG3664	Rab5	30518	y[1] v[1]; P{y[+t7.7] v[+t1.8]=TRiP.JF03335}attP2
Lethal	CG3585	Rbcn-3A	34612	y[1] sc[*] v[1]; P{y[+t7.7] v[+t1.8]=TRiP.HMS01287}attP2
Lethal	CG43073	Rbp	29312	y[1] v[1]; P{y[+t7.7] v[+t1.8]=TRiP.JF02471}attP2
Lethal	CG44835	rg	57703	y[1] sc[*] v[1]; P{y[+t7.7] v[+t1.8]=TRiP.HMC04892}attP40
Lethal	CG6831	rhea	28950	y[1] v[1]; P{y[+t7.7] v[+t1.8]=TRiP.HM05161}attP2
Lethal	CG3593	r-l	55183	y[1] sc[*] v[1]; P{y[+t7.7] v[+t1.8]=TRiP.HMC03871}attP40
Lethal	CG9774	Rok	28797	y[1] v[1]; P{y[+t7.7] v[+t1.8]=TRiP.JF03225}attP2
Lethal	CG32096	rols	58262	y[1] v[1]; P{y[+t7.7] v[+t1.8]=TRiP.HMJ22326}attP40
Lethal	CG6129	Rootletin	60494	y[1] v[1]; P{y[+t7.7] v[+t1.8]=TRiP.HMJ22888}attP40
Lethal	CG10230	Rpn9	34034	y[1] sc[*] v[1]; P{y[+t7.7] v[+t1.8]=TRiP.HMS01007}attP2
Lethal	CG9533	rut	27035	y[1] v[1]; P{y[+t7.7] v[+t1.8]=TRiP.JF02361}attP2/TM3, Sb[1]
Lethal	CG2674	Sam-S	29415	y[1] v[1]; P{y[+t7.7] v[+t1.8]=TRiP.JF03351}attP2/TM3, Sb[1]
Lethal	CG5580	sbb	27049	y[1] v[1]; P{y[+t7.7] v[+t1.8]=TRiP.JF02375}attP2
Lethal	CG8095	scb	38959	y[1] sc[*] v[1]; P{y[+t7.7] v[+t1.8]=TRiP.HMS01873}attP40
Lethal	CG7034	Sec15	27499	y[1] v[1]; P{y[+t7.7] v[+t1.8]=TRiP.JF02649}attP2
Lethal	CG5661	Sema-5c	29436	y[1] v[1]; P{y[+t7.7] v[+t1.8]=TRiP.JF03372}attP2
Lethal	CG32904	seq	51923	y1 v1; P{TRiP.HMC03316}attP2/TM3, Sb1 Ser1
Lethal	CG4545	SerT	62985	y[1] v[1]; P{y[+t7.7] v[+t1.8]=TRiP.HMJ30062}attP40
Lethal	CG11299	Sesn	64027	y[1] sc[*] v[1]; P{y[+t7.7] v[+t1.8]=TRiP.HMS05363}attP40
Lethal	CG8339	sfl	50538	y[1] v[1]; P{y[+t7.7] v[+t1.8]=TRiP.GLC01656}attP40
Lethal	CG8815	Sin3A	32368	y[1] sc[*] v[1]; P{y[+t7.7] v[+t1.8]=TRiP.HMS00359}attP2
Lethal	CG3539	Slh	50940	y[1] v[1]; P{y[+t7.7] v[+t1.8]=TRiP.HMJ21035}attP40/CyO
Lethal	CG6534	slou	29344	y[1] v[1]; P{y[+t7.7] v[+t1.8]=TRiP.JF02506}attP2
Lethal	CG1915	sls	31538	y[1] v[1]; P{y[+t7.7] v[+t1.8]=TRiP.JF01098}attP2
Lethal	CG5263	smg	56913	y[1] v[1]; P{y[+t7.7] v[+t1.8]=TRiP.HMS04335}attP40
Lethal	CG4013	Smr	34528	y[1] sc[*] v[1]; P{y[+t7.7] v[+t1.8]=TRiP.HMS00952}attP2
Lethal	CG3090	Sox14	34794	y[1] sc[*] v[1]; P{y[+t7.7] v[+t1.8]=TRiP.HMS00103}attP2
Lethal	CG8404	Sox15	57264	y[1] sc[*] v[1]; P{y[+t7.7] v[+t1.8]=TRiP.HMC04657}attP40
Lethal	CG5473	SP2637	37522	y[1] sc[*] v[1]; P{y[+t7.7] v[+t1.8]=TRiP.HMS01664}attP40
Lethal	CG5977	spas	27570	y[1] v[1]; P{y[+t7.7] v[+t1.8]=TRiP.JF02724}attP2
Lethal	CG16705	SPE	33926	y[1] sc[*] v[1]; P{y[+t7.7] v[+t1.8]=TRiP.HMS00873}attP2
Lethal	CG18497	spen	41619	y[1] v[1]; P{y[+t7.7] v[+t1.8]=TRiP.GL01201}attP40
Lethal	CG7847	sr	27701	y[1] v[1]; P{y[+t7.7] v[+t1.8]=TRiP.JF02781}attP2
Lethal	CG3992	srp	28606	y[1] v[1]; P{y[+t7.7] v[+t1.8]=TRiP.HM05094}attP2
Lethal	CG8268	Srp9	34568	y[1] sc[*] v[1]; P{y[+t7.7] v[+t1.8]=TRiP.HMS01041}attP2
Lethal	CG44162	Strn-Mlck	26736	y[1] v[1]; P{y[+t7.7] v[+t1.8]=TRiP.JF02278}attP2
Lethal	CG11502	svp	28689	y[1] v[1]; P{y[+t7.7] v[+t1.8]=TRiP.JF03105}attP2
Lethal	CG17838	Syp	56972	y[1] sc[*] v[1]; P{y[+t7.7] v[+t1.8]=TRiP.HMC04412}attP40
Lethal	CG31136	Syx1A	25811	y[1] v[1]; P{y[+t7.7] v[+t1.8]=TRiP.JF01829}attP2
Lethal	CG13109	tai	28971	y[1] v[1]; P{y[+t7.7] v[+t1.8]=TRiP.HM05182}attP2
Lethal	CG6146	Top1	55314	y[1] v[1]; P{y[+t7.7] v[+t1.8]=TRiP.HMC04001}attP40
Lethal	CG42865	trh	27986	y[1] v[1]; P{y[+t7.7] v[+t1.8]=TRiP.JF02188}attP2
Lethal	CG2848	Trn-SR	25988	y[1] v[1]; P{y[+t7.7] v[+t1.8]=TRiP.JF02010}attP2
Lethal	CG5751	TrpA1	31384	y[1] v[1]; P{y[+t7.7] v[+t1.8]=TRiP.JF01360}attP2
Lethal	CG5996	Trpgamma	31298	y[1] v[1]; P{y[+t7.7] v[+t1.8]=TRiP.JF01243}attP2
Lethal	CG10210	tst	55647	y[1] sc[*] v[1]; P{y[+t7.7] v[+t1.8]=TRiP.HMC03796}attP40
Lethal	CG10117	ttv	51480	y[1] v[1]; P{y[+t7.7] v[+t1.8]=TRiP.HMC03225}attP40
Lethal	CG10619	tup	51763	y[1] sc[*] v[1]; P{y[+t7.7] v[+t1.8]=TRiP.HMC03317}attP2
Lethal	CG15427	tutl	54850	y[1] v[1]; P{y[+t7.7] v[+t1.8]=TRiP.HMJ21587}attP40
Lethal	CG9138	uif	38354	y[1] v[1]; P{y[+t7.7] v[+t1.8]=TRiP.HMS01822}attP40
Lethal	CG4380	usp	27258	y[1] v[1]; P{y[+t7.7] v[+t1.8]=TRiP.JF02546}attP2
Lethal	CG6116	Uvrag	34368	y[1] sc[*] v[1]; P{y[+t7.7] v[+t1.8]=TRiP.HMS01357}attP2
Lethal	CG3762	Vha68-2	34582	y[1] sc[*] v[1]; P{y[+t7.7] v[+t1.8]=TRiP.HMS01056}attP2
Lethal	CG5075	Vha68-3	42954	y[1] sc[*] v[1]; P{y[+t7.7] v[+t1.8]=TRiP.HMS02647}attP40
Lethal	CG14168	Zasp67	42874	y[1] sc[*] v[1]; P{y[+t7.7] v[+t1.8]=TRiP.HMS02567}attP40
Lethal	CG6694	ZC3H3	61816	y[1] v[1]; P{y[+t7.7] v[+t1.8]=TRiP.HMJ23259}attP40
Lethal	CG5215	Zn72D	55635	y[1] sc[*] v[1]; P{y[+t7.7] v[+t1.8]=TRiP.HMC03782}attP40
NA	CG43164			No TRiP lines
NA	CG3653			No TRiP lines
NA	CG31628			No TRiP lines
NA	CG10501			No TRiP lines
NA	CG9703			No TRiP lines
NA	CG6611			No TRiP lines
NA	CG7780			No TRiP lines
NA	CG2904			No TRiP lines
NA	CG5803			No TRiP lines
NA	CG32356			No TRiP lines
NA	CG8923			No TRiP lines
NA	CG18740			No TRiP lines
NA	CG3479			No TRiP lines
NA	CG3440			No TRiP lines
NA	CG33103			No TRiP lines
NA	CG4033			No TRiP lines
NA	CG13209			No TRiP lines
NA	CG13478			No TRiP lines
NA	CG9218			No TRiP lines
NA	CG9224			No TRiP lines
NA	CG3401			No TRiP lines
NA	CG5123			No TRiP lines
NA	CG7936			No TRiP lines
NA	CG3724			No TRiP lines
NA	CG8153			No TRiP lines
NA	CG7978			No TRiP lines
NA	CG4790			No TRiP lines
NA	CG5394			No TRiP lines
NA	CG10939			No TRiP lines
NA	CG5786			No TRiP lines
NA	CG4760			No TRiP lines
NA	CG3959			No TRiP lines
NA	CG7108			No TRiP lines
NA	CG12002			No TRiP lines
NA	CG18285			No TRiP lines
NA	CG8556			No TRiP lines
NA	CG7325			No TRiP lines
NA	CG3488			No TRiP lines
NA	CG3853			No TRiP lines
NA	CG15865			No TRiP lines
NA	CG9660			No TRiP lines
NA	CR32747			No TRiP lines
NA	CG8322			No TRiP lines
NA	CG13695			No TRiP lines
NA	CR31271			No TRiP lines
NA	CG5405			No TRiP lines
NA	CG12396			No TRiP lines
NA	CG3630			No TRiP lines
NA	CG3456			No TRiP lines
NA	CG2701			No TRiP lines
NA	CG2681			No TRiP lines
NA	CG8910			No TRiP lines
NA	CG11622			No TRiP lines
NA	CG7740			No TRiP lines
NA	CG9726			No TRiP lines
NA	CG7574			No TRiP lines
NA	CG5991			No TRiP lines
NA	CG17324			No TRiP lines
NA	CG33206			No TRiP lines
NA	CG2217			No TRiP lines
NA	CG2239			No TRiP lines
NA	CG3897			No TRiP lines
NA	CG9414			No TRiP lines
NA	CG11759			No TRiP lines
NA	CG30116			No TRiP lines
NA	CG15267			No TRiP lines
NA	CG12535			No TRiP lines
NA	CG12206			No TRiP lines
NA	CG15465			No TRiP lines
NA	CG3309			No TRiP lines
NA	CG16752			No TRiP lines
NA	CG3097			No TRiP lines
NA	CG15894			No TRiP lines
NA	CG10695			No TRiP lines
NA	CG3198			No TRiP lines
NA	CG14442			No TRiP lines
NA	CG14441			No TRiP lines
NA	CG14439			No TRiP lines
NA	CG14435			No TRiP lines
NA	CG12541			No TRiP lines
NA	CG2556			No TRiP lines
NA	CG11138			No TRiP lines
NA	CG15728			No TRiP lines
NA	CG3812			No TRiP lines
NA	CG14414			No TRiP lines
NA	CG6294			No TRiP lines
NA	CG6299			No TRiP lines
NA	CG9947			No TRiP lines
NA	CG4420			No TRiP lines
NA	CG9903			No TRiP lines
NA	CG9782			No TRiP lines
NA	CG13012			No TRiP lines
NA	CG5445			No TRiP lines
NA	CG5613			No TRiP lines
NA	CG12991			No TRiP lines
NA	CG6398			No TRiP lines
NA	CG6461			No TRiP lines
NA	CG17600			No TRiP lines
NA	CG2657			No TRiP lines
NA	CG13694			No TRiP lines
NA	CG3645			No TRiP lines
NA	CG17075			No TRiP lines
NA	CG4297			No TRiP lines
NA	CG4552			No TRiP lines
NA	CG4577			No TRiP lines
NA	CG5126			No TRiP lines
NA	CG12674			No TRiP lines
NA	CG9967			No TRiP lines
NA	CG9866			No TRiP lines
NA	CG9870			No TRiP lines
NA	CG9964			No TRiP lines
NA	CG9894			No TRiP lines
NA	CG17224			No TRiP lines
NA	CG17264			No TRiP lines
NA	CG17223			No TRiP lines
NA	CG3277			No TRiP lines
NA	CG3254			No TRiP lines
NA	CG10031			No TRiP lines
NA	CG10019			No TRiP lines
NA	CG3921			No TRiP lines
NA	CG3964			No TRiP lines
NA	CG3675			No TRiP lines
NA	CG15431			No TRiP lines
NA	CG15435			No TRiP lines
NA	CG11929			No TRiP lines
NA	CG3251			No TRiP lines
NA	CG3244			No TRiP lines
NA	CG15629			No TRiP lines
NA	CG15626			No TRiP lines
NA	CG11927			No TRiP lines
NA	CG11926			No TRiP lines
NA	CG9171			No TRiP lines
NA	CG17375			No TRiP lines
NA	CG18304			No TRiP lines
NA	CG7134			No TRiP lines
NA	CG7356			No TRiP lines
NA	CG7810			No TRiP lines
NA	CG14275			No TRiP lines
NA	CG4364			No TRiP lines
NA	CG13116			No TRiP lines
NA	CG5604			No TRiP lines
NA	CG6232			No TRiP lines
NA	CG6144			No TRiP lines
NA	CG13144			No TRiP lines
NA	CG7329			No TRiP lines
NA	CG6785			No TRiP lines
NA	CG14946			No TRiP lines
NA	CG17031			No TRiP lines
NA	CG5792			No TRiP lines
NA	CG5142			No TRiP lines
NA	CG5122			No TRiP lines
NA	CG5682			No TRiP lines
NA	CG16972			No TRiP lines
NA	CG9431			No TRiP lines
NA	CG5705			No TRiP lines
NA	CG7110			No TRiP lines
NA	CG13280			No TRiP lines
NA	CG13284			No TRiP lines
NA	CG31743			No TRiP lines
NA	CG12620			No TRiP lines
NA	CG5674			No TRiP lines
NA	CG10176			No TRiP lines
NA	CG18397			No TRiP lines
NA	CG13214			No TRiP lines
NA	CG8785			No TRiP lines
NA	CG8646			No TRiP lines
NA	CG12374			No TRiP lines
NA	CG17574			No TRiP lines
NA	CG13321			No TRiP lines
NA	CG13325			No TRiP lines
NA	CG4604			No TRiP lines
NA	CG4744			No TRiP lines
NA	CG8468			No TRiP lines
NA	CG17453			No TRiP lines
NA	CG7639			No TRiP lines
NA	CG8180			No TRiP lines
NA	CG12963			No TRiP lines
NA	CG8253			No TRiP lines
NA	CG8370			No TRiP lines
NA	CG8405			No TRiP lines
NA	CG5065			No TRiP lines
NA	CG10950			No TRiP lines
NA	CG10936			No TRiP lines
NA	CG4996			No TRiP lines
NA	CG33996			No TRiP lines
NA	CG5482			No TRiP lines
NA	CG15077			No TRiP lines
NA	CG15078			No TRiP lines
NA	CG15080			No TRiP lines
NA	CG15096			No TRiP lines
NA	CG12758			No TRiP lines
NA	CG8654			No TRiP lines
NA	CG9864			No TRiP lines
NA	CG4763			No TRiP lines
NA	CG5549			No TRiP lines
NA	CG3907			No TRiP lines
NA	CG3386			No TRiP lines
NA	CG7991			No TRiP lines
NA	CG13934			No TRiP lines
NA	CG12734			No TRiP lines
NA	CG13722			No TRiP lines
NA	CG10121			No TRiP lines
NA	CG7457			No TRiP lines
NA	CG8277			No TRiP lines
NA	CG13675			No TRiP lines
NA	CG7375			No TRiP lines
NA	CG7213			No TRiP lines
NA	CG7201			No TRiP lines
NA	CG13670			No TRiP lines
NA	CG7081			No TRiP lines
NA	CG7120			No TRiP lines
NA	CG6983			No TRiP lines
NA	CG6673			No TRiP lines
NA	CG6416			No TRiP lines
NA	CG6511			No TRiP lines
NA	CG13310			No TRiP lines
NA	CG5068			No TRiP lines
NA	CG5087			No TRiP lines
NA	CG4665			No TRiP lines
NA	CG4484			No TRiP lines
NA	CG10809			No TRiP lines
NA	CG6709			No TRiP lines
NA	CG14160			No TRiP lines
NA	CG14156			No TRiP lines
NA	CG6409			No TRiP lines
NA	CG7888			No TRiP lines
NA	CG7638			No TRiP lines
NA	CG6207			No TRiP lines
NA	CG7339			No TRiP lines
NA	CG7334			No TRiP lines
NA	CG5964			No TRiP lines
NA	CG11588			No TRiP lines
NA	CG6938			No TRiP lines
NA	CG5048			No TRiP lines
NA	CG13471			No TRiP lines
NA	CG17839			No TRiP lines
NA	CG5392			No TRiP lines
NA	CG7297			No TRiP lines
NA	CG5151			No TRiP lines
NA	CG13033			No TRiP lines
NA	CG13024			No TRiP lines
NA	CG5992			No TRiP lines
NA	CG13698			No TRiP lines
NA	CG5137			No TRiP lines
NA	CG13699			No TRiP lines
NA	CG12806			No TRiP lines
NA	CG10095			No TRiP lines
NA	CG10185			No TRiP lines
NA	CG14909			No TRiP lines
NA	CG5873			No TRiP lines
NA	CG6040			No TRiP lines
NA	CG7432			No TRiP lines
NA	CG4662			No TRiP lines
NA	CG17190			No TRiP lines
NA	CG10887			No TRiP lines
NA	CG4323			No TRiP lines
NA	CG17272			No TRiP lines
NA	CG5630			No TRiP lines
NA	CG6475			No TRiP lines
NA	CG7956			No TRiP lines
NA	CG15498			No TRiP lines
NA	CG7077			No TRiP lines
NA	CG4467			No TRiP lines
NA	CG4408			No TRiP lines
NA	CG10175			No TRiP lines
NA	CG10170			No TRiP lines
NA	CG13822			No TRiP lines
NA	CG10300			No TRiP lines
NA	CG10365			No TRiP lines
NA	CG10374			No TRiP lines
NA	CG5854			No TRiP lines
NA	CG12268			No TRiP lines
NA	CG13607			No TRiP lines
NA	CG6164			No TRiP lines
NA	CG13606			No TRiP lines
NA	CG13611			No TRiP lines
NA	CG13625			No TRiP lines
NA	CG14064			No TRiP lines
NA	CG10011			No TRiP lines
NA	CG9990			No TRiP lines
NA	CG9728			No TRiP lines
NA	CG9702			No TRiP lines
NA	CG1340			No TRiP lines
NA	CG15550			No TRiP lines
NA	CG13686			No TRiP lines
NA	CG2259			No TRiP lines
NA	CG13759			No TRiP lines
NA	CG2854			No TRiP lines
NA	CG3655			No TRiP lines
NA	CG17193			No TRiP lines
NA	CG13439			No TRiP lines
NA	CG14162			No TRiP lines
NA	CG13306			No TRiP lines
NA	CG12994			No TRiP lines
NA	CG17777			No TRiP lines
NA	CG7590			No TRiP lines
NA	CG13417			No TRiP lines
NA	CG18559			No TRiP lines
NA	CG3524			No TRiP lines
NA	CG10251			No TRiP lines
NA	CG8998			No TRiP lines
NA	CG31931			No TRiP lines
NA	CG31732			No TRiP lines
NA	CG17278			No TRiP lines
NA	CG30065			No TRiP lines
NA	CG30073			No TRiP lines
NA	CG30091			No TRiP lines
NA	CG30118			No TRiP lines
NA	CG30323			No TRiP lines
NA	CG30419			No TRiP lines
NA	CG30472			No TRiP lines
NA	CG31013			No TRiP lines
NA	CG31133			No TRiP lines
NA	CG31145			No TRiP lines
NA	CG31163			No TRiP lines
NA	CG31191			No TRiP lines
NA	CG31635			No TRiP lines
NA	CG31663			No TRiP lines
NA	CG31721			No TRiP lines
NA	CG31742			No TRiP lines
NA	CG31778			No TRiP lines
NA	CR31781			No TRiP lines
NA	CG31805			No TRiP lines
NA	CG31815			No TRiP lines
NA	CG31851			No TRiP lines
NA	CG31869			No TRiP lines
NA	CG31871			No TRiP lines
NA	CG31897			No TRiP lines
NA	CG31957			No TRiP lines
NA	CR32034			No TRiP lines
NA	CG32053			No TRiP lines
NA	CG32066			No TRiP lines
NA	CG32081			No TRiP lines
NA	CR32111			No TRiP lines
NA	CG32137			No TRiP lines
NA	CG32333			No TRiP lines
NA	CG32365			No TRiP lines
NA	CG32373			No TRiP lines
NA	CG32379			No TRiP lines
NA	CG32485			No TRiP lines
NA	CG32571			No TRiP lines
NA	CG32647			No TRiP lines
NA	CG32650			No TRiP lines
NA	CG32719			No TRiP lines
NA	CR32773			No TRiP lines
NA	CG32813			No TRiP lines
NA	CG32832			No TRiP lines
NA	CG33125			No TRiP lines
NA	CG33136			No TRiP lines
NA	CG33158			No TRiP lines
NA	CG33207			No TRiP lines
NA	CG33229			No TRiP lines
NA	CG33260			No TRiP lines
NA	CG33516			No TRiP lines
NA	CG33543			No TRiP lines
NA	CG33928			No TRiP lines
NA	CG17531			No TRiP lines
NA	CG33934			No TRiP lines
NA	CG5154			No TRiP lines
NA	CG15013			No TRiP lines
NA	CG30023			No TRiP lines
NA	CG34106			No TRiP lines
NA	CG34185			No TRiP lines
NA	CG34313			No TRiP lines
NA	CG34325			No TRiP lines
NA	CG34351			No TRiP lines
NA	CG34355			No TRiP lines
NA	CG34362			No TRiP lines
NA	CG34375			No TRiP lines
NA	CG34382			No TRiP lines
NA	CG34386			No TRiP lines
NA	CG34390			No TRiP lines
NA	CG34391			No TRiP lines
NA	CG34393			No TRiP lines
NA	CG34433			No TRiP lines
NA	CG34451			No TRiP lines
NA	CG34453			No TRiP lines
NA	CG13272			No TRiP lines
NA	CG4840			No TRiP lines
NA	CG42230			No TRiP lines
NA	CG15151			No TRiP lines
NA	CG4845			No TRiP lines
NA	CG15394			No TRiP lines
NA	CG42255			No TRiP lines
NA	CG42258			No TRiP lines
NA	CG42265			No TRiP lines
NA	CG42268			No TRiP lines
NA	CG42275			No TRiP lines
NA	CG42280			No TRiP lines
NA	CG42310			No TRiP lines
NA	CG42313			No TRiP lines
NA	CG42319			No TRiP lines
NA	CG42322			No TRiP lines
NA	CG42324			No TRiP lines
NA	CG42339			No TRiP lines
NA	CG11711			No TRiP lines
NA	CG42354			No TRiP lines
NA	CG42389			No TRiP lines
NA	CG42464			No TRiP lines
NA	CG42492			No TRiP lines
NA	CG42508			No TRiP lines
NA	CG42524			No TRiP lines
NA	CG42540			No TRiP lines
NA	CG42556			No TRiP lines
NA	CG42570			No TRiP lines
NA	CG11838			No TRiP lines
NA	CG9056			No TRiP lines
NA	CG31190			No TRiP lines
NA	CG33174			No TRiP lines
NA	CG3638			No TRiP lines
NA	CR42651			No TRiP lines
NA	CG42716			No TRiP lines
NA	CR42719			No TRiP lines
NA	CG4272			No TRiP lines
NA	CG31247			No TRiP lines
NA	CG42555			No TRiP lines
NA	CG8776			No TRiP lines
NA	CG42740			No TRiP lines
NA	CG42750			No TRiP lines
NA	CG11940			No TRiP lines
NA	CG42816			No TRiP lines
NA	CG42825			No TRiP lines
NA	CG42826			No TRiP lines
NA	CR42836			No TRiP lines
NA	CR42862			No TRiP lines
NA	CG10882			No TRiP lines
NA	CG43110			No TRiP lines
NA	CR43126			No TRiP lines
NA	CG43225			No TRiP lines
NA	CR43276			No TRiP lines
NA	CR43304			No TRiP lines
NA	CR43314			No TRiP lines
NA	CG43322			No TRiP lines
NA	CR43353			No TRiP lines
NA	CG43373			No TRiP lines
NA	CG32556			No TRiP lines
NA	CG43401			No TRiP lines
NA	CG43406			No TRiP lines
NA	CR43408			No TRiP lines
NA	CG42784			No TRiP lines
NA	CR43431			No TRiP lines
NA	CR43461			No TRiP lines
NA	CR43464			No TRiP lines
NA	CR43609			No TRiP lines
NA	CG5949			No TRiP lines
NA	CG43707			No TRiP lines
NA	CG43736			No TRiP lines
NA	CG43737			No TRiP lines
NA	CG43759			No TRiP lines
NA	CG43778			No TRiP lines
NA	CR43852			No TRiP lines
NA	CG43867			No TRiP lines
NA	CR43870			No TRiP lines
NA	CG43901			No TRiP lines
NA	CG43921			No TRiP lines
NA	CG43954			No TRiP lines
NA	CG43955			No TRiP lines
NA	CR43963			No TRiP lines
NA	CR43974			No TRiP lines
NA	CG43998			No TRiP lines
NA	CG43999			No TRiP lines
NA	CG44011			No TRiP lines
NA	CR44035			No TRiP lines
NA	CR44050			No TRiP lines
NA	CR43261			No TRiP lines
NA	CR44083			No TRiP lines
NA	CG44085			No TRiP lines
NA	CG44122			No TRiP lines
NA	CR44133			No TRiP lines
NA	CR44178			No TRiP lines
NA	CG44195			No TRiP lines
NA	CR44206			No TRiP lines
NA	CG18531			No TRiP lines
NA	CR44282			No TRiP lines
NA	CR44310			No TRiP lines
NA	CR44326			No TRiP lines
NA	CR44357			No TRiP lines
NA	CR44393			No TRiP lines
NA	CG12621			No TRiP lines
NA	CR44485			No TRiP lines
NA	CR44490			No TRiP lines
NA	CR44632			No TRiP lines
NA	CR44740			No TRiP lines
NA	CR44767			No TRiP lines
NA	CR44779			No TRiP lines
NA	CR44797			No TRiP lines
NA	CR44801			No TRiP lines
NA	CR44811			No TRiP lines
NA	CR44833			No TRiP lines
NA	CG44836			No TRiP lines
NA	CR44886			No TRiP lines
NA	CR44901			No TRiP lines
NA	CR44914			No TRiP lines
NA	CR44915			No TRiP lines
NA	CG44954			No TRiP lines
NA	CR44972			No TRiP lines
NA	CR44988			No TRiP lines
NA	CR44995			No TRiP lines
NA	CR44999			No TRiP lines
NA	CG45086			No TRiP lines
NA	CG45101			No TRiP lines
NA	CR45137			No TRiP lines
NA	CR45191			No TRiP lines
NA	CG34349			No TRiP lines
NA	CR45217			No TRiP lines
NA	CG6643			No TRiP lines
NA	CG45263			No TRiP lines
NA	CR45286			No TRiP lines
NA	CR45338			No TRiP lines
NA	CR45378			No TRiP lines
NA	CG45477			No TRiP lines
NA	CR45552			No TRiP lines
NA	CR45668			No TRiP lines
NA	CR45683			No TRiP lines
NA	CG5183			No TRiP lines
